# Supplementary material for: Workplace violence, job satisfaction, burnout, perceived organisational support and their effects on turnover intention among Chinese nurses in tertiary hospitals: a cross-sectional study
Source: PubMed Central journal article supplement — BMJ Open. 2018 Jun 9;8(6):e019525. doi: 10.1136/bmjopen-2017-019525 (PMC6009508; doi:10.1136/bmjopen-2017-019525), 2018-06-09
Supplement: bmjopen-2017-019525.draft_revisions.pdf [file bmjopen-2017-019525.draft_revisions.pdf]

# BMJ Open

BMJ Open is committed to open peer review. As part of this commitment we make the peer review history of every article we publish publicly available.

When an article is published we post the peer reviewers' comments and the authors' responses online. We also post the versions of the paper that were used during peer review. These are the versions that the peer review comments apply to.

The versions of the paper that follow are the versions that were submitted during the peer review process. They are not the versions of record or the final published versions. They should not be cited or distributed as the published version of this manuscript.

BMJ Open is an open access journal and the full, final, typeset and author-corrected version of record of the manuscript is available on our site with no access controls, subscription charges or pay-per-view fees (<http://bmjopen.bmj.com>).

If you have any questions on BMJ Open's open peer review process please email [info.bmjopen@bmj.com](mailto:info.bmjopen@bmj.com)

# BMJ Open

## Workplace violence, job satisfaction, burnout, perceived organizational support and their effects on turnover intention among Chinese nurses in tertiary hospitals: a cross-sectional study

|                                 |                                                                                                                                                                                                                                                                                                                                                                                                                                                                                                                                                                                                                                                                                                                                                                                                                                                                                                                                                                                                                                                                                                                                                                                                                                                                                                                                                                                                                                                                                                                                                                                                                                                                                                                                   |
|---------------------------------|-----------------------------------------------------------------------------------------------------------------------------------------------------------------------------------------------------------------------------------------------------------------------------------------------------------------------------------------------------------------------------------------------------------------------------------------------------------------------------------------------------------------------------------------------------------------------------------------------------------------------------------------------------------------------------------------------------------------------------------------------------------------------------------------------------------------------------------------------------------------------------------------------------------------------------------------------------------------------------------------------------------------------------------------------------------------------------------------------------------------------------------------------------------------------------------------------------------------------------------------------------------------------------------------------------------------------------------------------------------------------------------------------------------------------------------------------------------------------------------------------------------------------------------------------------------------------------------------------------------------------------------------------------------------------------------------------------------------------------------|
| Journal:                        | <i>BMJ Open</i>                                                                                                                                                                                                                                                                                                                                                                                                                                                                                                                                                                                                                                                                                                                                                                                                                                                                                                                                                                                                                                                                                                                                                                                                                                                                                                                                                                                                                                                                                                                                                                                                                                                                                                                   |
| Manuscript ID                   | bmjopen-2017-019525                                                                                                                                                                                                                                                                                                                                                                                                                                                                                                                                                                                                                                                                                                                                                                                                                                                                                                                                                                                                                                                                                                                                                                                                                                                                                                                                                                                                                                                                                                                                                                                                                                                                                                               |
| Article Type:                   | Research                                                                                                                                                                                                                                                                                                                                                                                                                                                                                                                                                                                                                                                                                                                                                                                                                                                                                                                                                                                                                                                                                                                                                                                                                                                                                                                                                                                                                                                                                                                                                                                                                                                                                                                          |
| Date Submitted by the Author:   | 08-Sep-2017                                                                                                                                                                                                                                                                                                                                                                                                                                                                                                                                                                                                                                                                                                                                                                                                                                                                                                                                                                                                                                                                                                                                                                                                                                                                                                                                                                                                                                                                                                                                                                                                                                                                                                                       |
| Complete List of Authors:       | <p>Liu, Wenhui; Harbin Medical University School of Public Health, Department of Health Management</p> <p>Zhao, Shihong; The Second Affiliated Hospital of Harbin Medical University, Department of Neurosurgery; School of Public Health, Harbin Medical University, Department of Health Management</p> <p>Shi, Lei; School of Public Health, Harbin Medical University, Department of Health Management</p> <p>Zhang, Zhong; School of Public Health, Harbin Medical University, Department of Medical Education</p> <p>Liu, Xinyan; Harbin Medical University, Department of Medical Education, School of Public Health</p> <p>Li, Li; School of Public Health, Harbin Medical University, Department of Health Management</p> <p>Duan, Xiaojian; School of Public Health, Harbin Medical University, Department of Health Management</p> <p>Li, Guoqiang; Harbin Medical University, Department of Health Management, School of Public Health</p> <p>Lou, Fengge; School of Public Health, Qiqihar Medical University, Department of Public Health Research</p> <p>Jia, Xiaoli; Chinese Hospital Association, Department of Autonomous Protection</p> <p>Fan, Lihua; Harbin Medical University, Department of Health Management, School of Public Health; School of Public Health, Harbin Medical University, Department of Medical Education</p> <p>Sun, Tao; School of Public Health, Harbin Medical University, Harbin, Department of Medical Education; School of Public Health, Harbin Medical University, Harbin, Department of Health Management</p> <p>Ni, Xin; National Center for Children's Health, Beijing Children's Hospital affiliated to Capital Medical University, Department of the Hospital Director</p> |
| <b>Primary Subject Heading</b>: | Health policy                                                                                                                                                                                                                                                                                                                                                                                                                                                                                                                                                                                                                                                                                                                                                                                                                                                                                                                                                                                                                                                                                                                                                                                                                                                                                                                                                                                                                                                                                                                                                                                                                                                                                                                     |
| Secondary Subject Heading:      | Health policy, Health services research, Nursing, Medical management                                                                                                                                                                                                                                                                                                                                                                                                                                                                                                                                                                                                                                                                                                                                                                                                                                                                                                                                                                                                                                                                                                                                                                                                                                                                                                                                                                                                                                                                                                                                                                                                                                                              |
| Keywords:                       | Workplace violence, job satisfaction, burnout, organizational support, turnover intention, nurses                                                                                                                                                                                                                                                                                                                                                                                                                                                                                                                                                                                                                                                                                                                                                                                                                                                                                                                                                                                                                                                                                                                                                                                                                                                                                                                                                                                                                                                                                                                                                                                                                                 |

1  
2  
3  
4  
5  
6  
7  
8  
9  
10  
11  
12  
13  
14  
15  
16  
17  
18  
19  
20  
21  
22  
23  
24  
25  
26  
27  
28  
29  
30  
31  
32  
33  
34  
35  
36  
37  
38  
39  
40  
41  
42  
43  
44  
45  
46  
47  
48  
49  
50  
51  
52  
53  
54  
55  
56  
57  
58  
59  
60

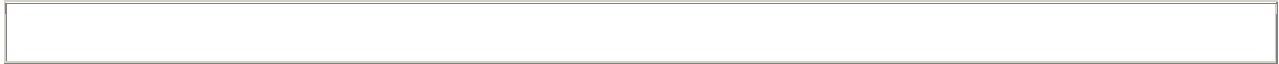

SCHOLARONE™  
Manuscripts

For peer review only

1  
2  
3  
4 **Workplace violence, job satisfaction, burnout, perceived organizational support and**  
5  
6 **their effects on turnover intention among Chinese nurses in tertiary hospitals: a**  
7  
8 **cross-sectional study**  
9

10  
11  
12  
13 Wenhui Liu,<sup>1\*</sup> Shihong Zhao,<sup>1,2\*</sup> Lei Shi,<sup>1\*</sup> Zhong Zhang,<sup>3</sup> Xinyan Liu,<sup>3</sup> Li Li,<sup>1</sup> Xiaojian Duan,<sup>1</sup>

14  
15  
16 Guoqiang Li,<sup>1</sup> Fengge Lou,<sup>4</sup> Xiaoli Jia,<sup>5</sup> Lihua Fan,<sup>1,3</sup> Tao Sun,<sup>1,3</sup> Xin Ni<sup>6</sup>

17  
18  
19  
20 \*WL, SZ and LS contributed equally to this work.

21  
22  
23 **Correspondence to:** Lihua Fan, School of Public Health, Harbin Medical University, No.157 Baojian  
24 Road, Nangang District, Harbin 150081, China; E-mail: [lihuafan@126.com](mailto:lihuafan@126.com); Tao Sun, School of Public  
25 Health, Harbin Medical University, No.157 Baojian Road, Nangang District, Harbin 150081, China;  
26 E-mail: [hydsunntao@126.com](mailto:hydsunntao@126.com); Xin Ni, No.56 Nanlishi Road, Xicheng District, Beijing 100045, China;  
27 E-mail: [nixin@bch.com.cn](mailto:nixin@bch.com.cn)  
28  
29  
30  
31  
32

33  
34 <sup>1</sup> Department of Health Management, School of Public Health, Harbin Medical University, Harbin,  
35 Heilongjiang, China

36  
37 <sup>2</sup> Department of Neurosurgery, The Second Affiliated Hospital of Harbin Medical University, Harbin,  
38 Heilongjiang, China

39  
40 <sup>3</sup> Department of Medical Education, School of Public Health, Harbin Medical University, Harbin,  
41 Heilongjiang, China

42  
43 <sup>4</sup> Department of Public Health Research, School of Public Health, Qiqihar Medical University, Qiqihar,  
44 Heilongjiang, China

45  
46 <sup>5</sup> Department of Autonomous Protection, Chinese Hospital Association, Beijing, China

47  
48 <sup>6</sup> Department of the Hospital Director, National Center for Children's Health, Beijing Children's Hospital  
49 affiliated to Capital Medical University, Beijing, China  
50  
51  
52  
53

**Abstract****Objective**

Our aim was to assess the relationship between workplace violence, job satisfaction, burnout, organizational support and turnover intention, and explore factors associated with turnover intention among nurses in Chinese tertiary hospitals.

**Methods**

A cross-sectional study was conducted using the Workplace Violence Scale, the Chinese Maslach Burnout Inventory General Survey, the Minnesota Job Satisfaction Questionnaire Revised Short Version, the Perceived Organizational Support–Simplified Version Scale, and the Turnover Intention Scale. The purposive sampling method was used to collect data from August 2016 through January 2017. A total of 1761 nurses from 9 public tertiary hospitals in 4 provinces (municipalities) located in eastern (Beijing), central (Heilongjiang, Anhui), and western (Shaanxi) of China completed the questionnaires (effective response rate = 85.20%).

**Results**

A total of 1216 of 1706 (69.1%) participants had high turnover intention. During the previous 12 months, the prevalence of physical violence and psychological violence toward nurses was 9.60% and 59.64%, respectively. As expected, the level of turnover intention was negatively correlated with participants' scores on job satisfaction ( $r = -0.367$ ,  $P < 0.001$ ) and perceived organizational support ( $r = -0.379$ ,  $P < 0.001$ ), respectively. Burnout was positively associated with turnover intention ( $r = 0.444$ ,  $P < 0.001$ ). Workplace violence was positively associated with turnover intention ( $\beta = 0.035$ ,  $P < 0.001$ ) in linear regression analysis. The total effect ( $\beta = 0.53$ ) of workplace violence on turnover intention comprised its direct effect ( $\beta = 0.36$ ), and its indirect effect ( $\beta = 0.17$ ).

## Conclusions

The turnover intention of nurses in tertiary hospitals is close to our expected results in the present study.

The results suggest that job satisfaction and organizational support can reduce nurses' turnover intention. A series of measures should be taken by hospital administrations to improve nurses' sense of organizational belonging and job satisfaction, reduce the loss of nursing human resources, and foster job stability for nurses.

## Strengths and limitations of this study

- We explored factors associated with turnover intention among nurses in Chinese tertiary hospitals.
- A variety of statistical methods were employed to investigate the relationship between independent variables and turnover intention.
- The retrospective approach to collecting data using self-reports of workplace violence might have led to recall and report bias.
- The results of purposive sampling were greatly influenced due to the preconceptions of the researchers. Therefore, the researchers need to clearly understand the basic characteristics of the population under study.

## INTRODUCTION

In 2015, the total number of registered nurses in China reached 3.241 million. Compared with 2010, the number of registered nurses per 1,000 population increased from 1.52 to 2.36.<sup>1</sup> The ratio of physicians to nurses in China has increased from 1:0.85 in 2010 to 1:1.07 in 2015, and the inverse ratio of physician and nurse has been fundamentally reversed for a long time. In 2001-2002, the results of the Health Resources Report for the Western Pacific Region concerning the present situation, shortages, and future trends within the world of nursing showed that the ratio of physicians to nurses in Hongkong, Japan, Thailand, Germany, and the United Kingdom was more than 1:4, and that the ratio of physicians to nurses in Finland, Norway, and Canada was over 1:6.<sup>2</sup> In view of this, an inadequate supply of nurses has been a long-existing problem in China.

Turnover intention is defined as the possibility that employees will leave a job within a certain period.<sup>3</sup> The first study on turnover used the participant determination model proposed by March and Simon in 1958.<sup>4</sup> Following on from that study, standardized models, for example, the decision-making process model, the employee-withdrawal behavior model, and the intermediate chain extension model, have been constructed, using the peak mutation model, the unfolding model, and the loss motivation model.<sup>8-12</sup> Among these theoretical models and studies, turnover intention has been considered to be one of the best factors to predict turnover behavior, and has shown significant explanatory power.<sup>13</sup> Therefore, turnover intention has been the focus of this study.

High turnover among nurses has been a major challenge for many healthcare organizations.<sup>14</sup> About 40% of the registered nurses in a teaching hospital in Malaysia were reported to have a turnover intention, and the results indicated that age, work experience, nursing education, and overall job satisfaction significantly influence an intention to leave.<sup>15</sup> A survey was conducted in 4 general

1  
2  
3 hospitals in Seoul, and the findings showed that factors influencing turnover intention involve the  
4  
5 organizational system, depersonalization, the physical environment, work role, and the organizational  
6  
7 climate.<sup>16</sup> A review of the research literature revealed that factors related to the work environment were  
8  
9 the most important in respect of nurses' turnover intentions.<sup>17</sup> A study has been conducted among  
10  
11 nurses in 1,105 general acute care hospitals in Europe and the United States, and showed that the rates  
12  
13 of nurse burnout ranged from 10% to 78%, with the job dissatisfaction rate ranging from 11% to 56%  
14  
15 and the intention to leave rate ranging from 14% to 49%.<sup>18</sup> In China, an investigation in Tianjin showed  
16  
17 that work support had an impact on turnover intention. Thus, some precautions need to be taken to  
18  
19 prevent turnover to ensure the job stability of the nursing workforce.  
20  
21  
22  
23  
24

25  
26 However, turnover intention is usually affected through a variety of factors, for example, work  
27  
28 stress,<sup>19</sup> workplace violence,<sup>20</sup> job satisfaction,<sup>15</sup> burnout,<sup>21</sup> perceived organizational support,<sup>22</sup>  
29  
30 organizational commitment,<sup>22</sup> among others. Workplace violence is a widely-reported phenomenon  
31  
32 among nurses in medical settings, and it influences the turnover intention of nurses.<sup>23-26</sup> China, in  
33  
34 particular, has reported that healthcare workers have experienced a series of violent incidents, and this  
35  
36 has attracted worldwide attention.<sup>27</sup> Workplace violence can be divided into physical (including hitting,  
37  
38 shooting, kicking, slapping, pushing, biting, pinching, wounding using sharp objects, and sexual assault  
39  
40 and rape) and psychological violence (including verbal abuse, threats and sexual harassment).<sup>28-29</sup> A  
41  
42 study revealed that 28% of the nurses in New Jersey were leaving their work because of workplace  
43  
44 violence exposure.<sup>30</sup> A previous study showed that most nurses had experienced verbal violence (93.7%)  
45  
46 and physical violence (23.4%) at their workplace.<sup>31</sup> A total of 78.1% of nurses who had experienced  
47  
48 verbal violence and 86.2% of nurses who had experienced physical violence reported that they were  
49  
50 inclined to turnover after those violence episodes.<sup>32</sup> Therefore, workplace violence is one of the  
51  
52  
53  
54  
55  
56  
57  
58  
59  
60



1  
2  
3 influential factors in turnover intention.<sup>26</sup> McDowell found workplace violence was significantly  
4 related to burnout ( $r = 0.56, P < 0.01$ ) and turnover intention ( $r = 0.24, P < 0.01$ ) for all direct care  
5  
6  
7  
8 paraprofessionals.<sup>32</sup>  
9

10  
11 Job satisfaction represents the extent to which personnel's demands and desires are met within the  
12 workplace.<sup>33</sup> It has been considered as a major contributory factor to intending to stay in a job, in  
13 previous studies.<sup>15 17 34</sup> In contrast to this viewpoint, previous studies have also shown that job  
14  
15  
16  
17  
18  
19  
20  
21  
22  
23  
24  
25  
26  
27  
28  
29  
30  
31  
32  
33  
34  
35  
36  
37  
38  
39  
40  
41  
42  
43  
44  
45  
46  
47  
48  
49  
50  
51  
52  
53  
54  
55  
56  
57  
58  
59  
60  
satisfaction mainly affects turnover intention in respect of organizational commitment.<sup>35-36</sup> Furthermore,  
a third view has showed that two considerations, namely having demands and desires met and  
organizational commitment, exist simultaneously regarding job satisfaction and turnover intention.<sup>37</sup>

25  
26  
27  
28  
29  
30  
31  
32  
33  
34  
35  
36  
37  
38  
39  
40  
41  
42  
43  
44  
45  
46  
47  
48  
49  
50  
51  
52  
53  
54  
55  
56  
57  
58  
59  
60  
Burnout is a syndrome involving emotional exhaustion and depersonalization and where personal  
accomplishments are reduced, resulting in continuous work stress that has not been effectively  
handled.<sup>38</sup> Moreover, substantial evidence has indicated that employees with high levels of burnout are  
more prone to turnover intention.<sup>32 39</sup> Perceived organizational support refers to the overall perception  
and beliefs of employees about how organizations view their contributions and care about their  
interests.<sup>40</sup> Some studies have reported that perceived organizational support is a predictor of turnover  
intention.<sup>22 35 41</sup> One study has indicated that perceived organizational support is negatively associated  
with turnover intention.<sup>42</sup> However, there has been little research conducted on the moderating effects  
of perceived organizational support and job satisfaction in relation to workplace violence, burnout, and  
turnover intention for Chinese nurses.

50  
51  
52  
53  
54  
55  
56  
57  
58  
59  
60  
The present study aims to examine the relationship between workplace violence, job satisfaction,  
burnout, organizational support and turnover intention, and explore factors associated with turnover  
intention among nurses in Chinese tertiary hospitals.

## METHODS

### Participants and sampling

A cross-sectional study of nurses was conducted from August 2016 through January 2017 in eastern (Beijing), central (Heilongjiang, Anhui), and western (Shaanxi) of China. A total of nine public tertiary hospitals in four provinces (municipalities) were selected using a purposive sampling method. All investigators were subject to unified training before starting the investigation and could act as investigators when qualified. We acquired permission to conduct our study from the managers, and the medical dispute resolution and human resources departments, of the hospitals concerned. An anonymous, self-administered questionnaire was used to conduct face-to-face surveys. We selected 2 public hospitals in Harbin (the Fourth Affiliated Hospital of Harbin Medical University and the principal hospital of Harbin) as the locations for our pre-study before the formal investigation (200 questionnaires were distributed and returned, and these data were excluded in the formal survey data). The investigators and hospital coordinators distributed and took back the questionnaires immediately from the participants. A total of 2,067 questionnaires were distributed to nurses, all of which were returned. However, 306 questionnaires were missing data or blank, which left 1,761 valid questionnaires (effective response rate = 85.20%). The following conditions were selected as the inclusion criteria for this study: (1) having a practicing nurse certificate; (2) having at least one year of clinical nursing experience; (3) being still engaged in clinical nursing work during the investigation; and (4) voluntary participation without prejudice to the participants' work. The exclusion criteria for this study were rehire after retirement nurses, refresher nurses, and nurses who had not passed the probation period.

### Questionnaire

### ***Demographic characteristics***

Demographic information on the nurses was collected, including sex, age, marital status, educational background, technical title, employment role, department, years of experience, and daily working hours. Age was categorized as  $\leq 30$ , 31–50, and  $\geq 51$  years old. Marital status was categorized as married and single/divorced/widowed. Educational background was classified as junior college or below, undergraduate, and master's degree or above. Technical title was categorized as primary, intermediate, and senior. Department was classified as emergency department, internal medicine, surgery, obstetrics and gynecology, pediatrics, and other. Work experience was divided into 4 categories:  $\leq 4$ , 5–10, 11–20, and  $\geq 21$  years. Daily working time was categorized as  $\leq 8$ , 8–10, 10–12, and  $\geq 12$  hours.

### ***Workplace Violence Scale***

The Workplace Violence Scale developed by the International Labour Office, the International Council of Nurses, the World Health Organization, and Public Services International Joint Program on Workplace Violence in the Health Sector in 2003 was used to measure workplace violence.<sup>43</sup> The scale used in this study consists of 2 dimensions (physical violence and psychological violence) and has 9 items that were adopted from these scales. Each item is scored on a 4-point scale reflecting respondents' frequency of exposure to workplace violence (0 = 0 times, 1 = 1 time, 2 = 2–3 times, and 3 =  $\geq 4$  times). The total possible score ranges from 0 to 27, with a higher total score indicating a higher frequency of exposure to workplace violence. In the present study, Cronbach's  $\alpha$  for the Workplace Violence Scale was 0.86.

### ***Burnout***

Burnout was assessed using the Chinese Maslach Burnout Inventory General Survey (CMBI-GS) in the present study, with a total of 15 items, developed by Li YX, and proven to be valid.<sup>44–46</sup> The

1  
2  
3 CMBI-GS is categorized into 3 subscales reflecting job burnout: emotional exhaustion,  
4  
5  
6  
7  
8  
9  
10  
11  
12  
13  
14  
15  
16  
17  
18  
19  
20  
21  
22  
23  
24  
25  
26  
27  
28  
29  
30  
31  
32  
33  
34  
35  
36  
37  
38  
39  
40  
41  
42  
43  
44  
45  
46  
47  
48  
49  
50  
51  
52  
53  
54  
55  
56  
57  
58  
59  
60

CMBI-GS is categorized into 3 subscales reflecting job burnout: emotional exhaustion, depersonalization, and reduced personal accomplishment. The response options for each item on the CMBI-GS are rated from 0 (never) to 6 (daily), based on the frequency of occurrence of the specific work feelings of the respondent. The score of the 3 subscales is equal to the average of the sum of items for each of the subscales. The total possible score is calculated through adding the scores for 3 subscales, and it ranges from 0 to 18 points, with a higher score indicating a higher level of burnout. In terms of the average score of all items, a score less than 8.5 points indicates lower job burnout, a score of 8.5–14.2 points indicates that burnout is serious, and burnout is extremely serious when the score is greater than 14.2 points. In this study, Cronbach's  $\alpha$  for the CMBI-GS was 0.873. The internal consistency coefficients were 0.834, 0.826, 0.806, and 0.812, for emotional exhaustion, depersonalization, and reduced personal accomplishment, respectively.

### ***Job satisfaction***

The Minnesota Job Satisfaction Questionnaire Revised Short Version (MJSQ-RSV) was used in this study to assess participants' satisfaction with their job.<sup>47-48</sup> The MJSQ-RSV consists of 20 items, including 12 items measuring intrinsic satisfaction and 8 items measuring extrinsic satisfaction. Each item is rated on a 5-point Likert scale (1 = strongly unsatisfied, 2 = unsatisfied, 3 = uncertain, 4 = satisfied, and 5 = strongly satisfied). Intrinsic satisfaction refers to the degree of satisfaction with the factors involved in the job content. Extrinsic satisfaction refers to the degree of satisfaction of the individual in terms of current job rewards, promotion, and leadership style. The higher the participant's self-rating, the higher their satisfaction with the job. The present study revealed that Cronbach's  $\alpha$  for the MJSQ-RSV was 0.882, and for the two subscales it was 0.872 (intrinsic satisfaction) and 0.896 (extrinsic satisfaction).

### ***Perceived organizational support scale***

Perceived organizational support was measured using the Perceived Organizational Support–Simplified Version Scale (POS–SVS). Previous studies have found the POS–SVS to have high reliability and validity as a measure of perceived organizational support.<sup>41–42 49</sup> It consists of nine self–report items, which comprise two reverse questions. Each item is rated on a 5–point Likert scale, and ranged from 1 (extremely inconsistent) to 5 (extremely consistent). The total possible score is calculated through adding the scores for all items, and it ranges from 9 to 45 points, with a higher score indicating a higher organizational support. In this study, Cronbach’s  $\alpha$  for the POS–SVS was 0.89.

### ***Turnover intention scale***

The Turnover Intention Scale, which has been used to measure turnover intention among nurses was used in the present study. The turnover intention scale was developed by Lee and Lee,<sup>50</sup> and has been widely used in many studies.<sup>3 51</sup> This 6–item scale is divided into 3 dimensions: the possibility of an employee quitting his/her present job, the motivation for employees to find other jobs, and the possibility of employees having access to external work. Each item is scored on a 4–point scale reflecting participants’ intention to leave (1 = never, 2 = seldom, 3 = occasionally, and 4 = often). The total possible score is counted through adding the scores for all items, and it ranges from 6 to 24 points, with a higher score indicating a stronger intention to leave. The extent of turnover intention is divided into 4 levels according to the different total average score of turnover intention. A total average score  $\leq$  1 indicates that turnover intention is particularly low, less low when it is from 1 to 2, higher when it is from 2 to 3, and exceptionally high when it is greater than 3. In the present study, Cronbach’s  $\alpha$  for the Turnover Intention Scale was 0.89.

### **Data Analysis**

1  
2  
3 EpiData version 3.1 was used to establish the study's database. We eliminated the questions with  
4  
5 missing data or quality issues. To ensure accuracy, two trained personnel entered the data after all the  
6  
7 surveys were completed. IBM SPSS V.19.0 was used for the data analysis in this study. Descriptive  
8  
9 statistics, including numbers (n), percentages (%), means, and standard deviations (SD) were calculated  
10  
11 for the demographic variables. We used one-way analysis of variance (ANOVA) or independent  
12  
13 sample t-tests to compare group differences concerning the measurements of the continuous variables.  
14  
15 Pearson's correlations were used to examine correlations among the continuous variables. Linear  
16  
17 regression analysis was used to examine the associations of the demographic variables and workplace  
18  
19 violence, job satisfaction, burnout, perceived organizational support, and turnover intention variables.  
20  
21 Statistics, including F values,  $R^2$ ,  $R^2$ -changes ( $\Delta R^2$ ), standardized regression coefficients ( $\beta$ ), and  
22  
23 P-values for each step in the regression model were reported. All study variables were tested for  
24  
25 multicollinearity. A P-value < 0.05 was considered statistically significant.  
26  
27  
28  
29  
30  
31

32  
33 Path analysis was used to examine the relationship among the five variables, including workplace  
34  
35 violence, job satisfaction, burnout, perceived organizational support, and turnover intention. A  
36  
37 structural equation model (SEM) for path analysis was constructed using the AMOS 17.0 program to  
38  
39 analyze the effect of workplace violence on job satisfaction, burnout, perceived organizational support,  
40  
41 and turnover intention. The model was considered to have a good fit when all path coefficients were  
42  
43 significant at the level of 0.05;  $\chi^2/df$ , was below 5; the standardized root mean square residual (SRMR)  
44  
45 was below 0.08; the root mean square error of approximation (RMSEA) was below 0.08; the root mean  
46  
47 square residual (RMR) was below 0.10; as well as the goodness of fit index (GFI), the normed fit index  
48  
49 (NFI), Tucker-Lewis incremental fit (TLI) and comparative fit index (CFI) being  $\geq 0.90$ .  
50  
51  
52  
53

#### 54 55 **STROBE Statement**

We declared that the STROBE (Strengthening the Reporting of Observational Studies in Epidemiology) guidelines are followed in this study.

### **Ethical Considerations**

Ethical approval to conduct this study was granted by the Research Ethics Committee of Harbin Medical University, and informed consent was obtained from each hospital and the nurses involved in the investigation. All participants gave their informed consent before the survey; they were assured that their personal information would be kept confidential.

## **RESULTS**

### **Demographic Characteristics of the Participants**

The demographic characteristics of the respondents are shown in Table 1.

**Table 1. Demographic characteristics of participants (N=1761).**

| <b>Demographic variables</b> | <b>n</b> | <b>%</b> |
|------------------------------|----------|----------|
| <b>Gender</b>                |          |          |
| Male                         | 60       | 3.4      |
| Female                       | 1701     | 96.6     |
| <b>Age group (years)</b>     |          |          |
| ≤ 30                         | 899      | 51.1     |
| 31-50                        | 793      | 45.0     |
| ≥ 51                         | 69       | 3.9      |
| <b>Level of education</b>    |          |          |
| Junior college or below      | 715      | 40.6     |
| Undergraduate                | 1020     | 57.9     |
| Master's degree or above     | 26       | 1.5      |
| <b>Marital status</b>        |          |          |
| Married                      | 1128     | 64.1     |
| Single/ divorced/ widowed    | 633      | 35.9     |
| <b>Technical title</b>       |          |          |
| Primary                      | 1161     | 65.9     |
| Intermediate                 | 528      | 30.0     |
| Senior                       | 72       | 4.1      |
| <b>Employment role</b>       |          |          |
| Formal staff                 | 693      | 39.4     |

|                            |      |      |
|----------------------------|------|------|
| Appointment staff          | 1068 | 60.6 |
| <b>Department</b>          |      |      |
| Emergency Department       | 299  | 17.0 |
| Internal Medicine          | 559  | 31.7 |
| Surgery                    | 543  | 30.8 |
| Obstetrics and Gynecology  | 93   | 5.3  |
| Pediatrics                 | 101  | 5.7  |
| ENT*                       | 82   | 4.7  |
| Other                      | 84   | 4.8  |
| <b>Years of experience</b> |      |      |
| ≤4                         | 529  | 30.0 |
| 5-10                       | 619  | 35.2 |
| 11-20                      | 346  | 19.6 |
| ≥21                        | 267  | 15.2 |
| <b>Daily working hours</b> |      |      |
| ≤ 8                        | 113  | 6.4  |
| 8-10                       | 1485 | 84.3 |
| 10-12                      | 126  | 7.2  |
| ≥ 12                       | 37   | 2.1  |

\* ENT stand for eyes, nose, throat

#### **Prevalence of Workplace Violence in the Preceding 12 Months**

During the previous 12 months, the prevalence of physical violence and psychological violence toward nurses was 9.60% (169/1761) and 59.64% (1111/1761), respectively. In the past year, respondents reported an exposure frequency of workplace violence at less than or equal to 3, accounting for 65.9% of all incidents. The respondents reported that the patients' relatives were the main perpetrators (71.2%, n = 797), followed by the patients (25.4%, n = 284).

#### **The Difference Between Participants' Characteristics and the Multiple Variables Score**

Table 2 shows the descriptive association between respondents' characteristics and the burnout, job satisfaction, organizational support, and turnover intention scores. There was a significant difference in the score of turnover intention among characteristics involving age group, educational level, different professional titles, employment form, department, years of experience and daily working hours for nurses in the tertiary hospitals.



1  
2  
3  
4  
5  
6  
7  
8  
9  
10  
11  
12  
13  
14  
15  
16  
17  
18  
19  
20  
21  
22  
23  
24  
25  
26  
27  
28  
29  
30  
31  
32  
33  
34  
35  
36  
37  
38  
39  
40  
41  
42  
43  
44  
45  
46  
47

**Table 2. Burnout, job satisfaction, perceived organizational support and turnover intention according to general characteristics.**

| Characteristics           | Burnout   | Job satisfaction | Perceived organizational support | Turnover intention |
|---------------------------|-----------|------------------|----------------------------------|--------------------|
|                           | M±SD      | M±SD             | M±SD                             | M±SD               |
| <b>Gender</b>             |           |                  |                                  |                    |
| Male                      | 6.23±3.34 | 3.54±0.55        | 3.27±0.57                        | 2.30±0.71          |
| Female                    | 6.53±3.08 | 3.52±0.54        | 3.10±0.64                        | 2.40±0.60          |
| <b>F/t</b>                | -0.757    | 0.256            | 1.991*                           | -1.263             |
| <b>Age group (years)</b>  |           |                  |                                  |                    |
| ≤ 30                      | 6.58±3.03 | 3.54±0.54        | 3.13±0.64                        | 2.44±0.61          |
| 31-50                     | 6.53±3.16 | 3.50±0.55        | 3.07±0.65                        | 2.39±0.60          |
| ≥ 51                      | 5.80±3.07 | 3.55±0.52        | 3.14±0.57                        | 2.04±0.56          |
| <b>F/t</b>                | 2.040     | 1.672            | 1.986                            | 14.144**           |
| <b>Level of education</b> |           |                  |                                  |                    |
| Junior college or below   | 6.62±3.01 | 3.52±0.54        | 3.11±0.61                        | 2.38±0.63          |
| Undergraduate             | 6.48±3.13 | 3.53±0.55        | 3.10±0.65                        | 2.42±0.58          |
| Master's degree or above  | 5.54±3.40 | 3.58±0.54        | 3.27±0.78                        | 2.08±0.61          |
| <b>F/t</b>                | 1.737     | 0.202            | 0.888                            | 4.468*             |
| <b>Marital status</b>     |           |                  |                                  |                    |
| Married                   | 6.45±3.12 | 3.52±0.54        | 3.10±0.65                        | 2.38±0.60          |
| Single/ divorced/ widowed | 6.65±3.03 | 3.53±0.56        | 3.12±0.63                        | 2.43±0.61          |
| <b>F/t</b>                | -1.304    | -0.203           | -0.843                           | -1.658             |
| <b>Technical title</b>    |           |                  |                                  |                    |
| Primary                   | 6.67±3.04 | 3.53±0.54        | 3.11±0.65                        | 2.45±0.60          |
| Intermediate              | 6.42±3.17 | 3.49±0.56        | 3.07±0.62                        | 2.31±0.61          |
| Senior                    | 4.87±2.77 | 3.70±0.50        | 3.25±0.68                        | 2.17±0.59          |
| <b>F/t</b>                | 12.077**  | 4.781**          | 2.735                            | 15.543**           |

|                            |           |           |           |           |
|----------------------------|-----------|-----------|-----------|-----------|
| <b>Employment role</b>     |           |           |           |           |
| Formal staff               | 6.71±3.30 | 3.48±0.57 | 3.05±0.65 | 2.32±0.60 |
| Appointment staff          | 6.40±2.94 | 3.55±0.52 | 3.14±0.63 | 2.45±0.61 |
| <b>F/t</b>                 | 2.025*    | -2.460*   | -2.779**  | -4.377**  |
| <b>Department</b>          |           |           |           |           |
| Emergency Department       | 6.51±3.21 | 3.51±0.60 | 3.12±0.70 | 2.37±0.63 |
| Internal Medicine          | 6.40±3.06 | 3.55±0.55 | 3.15±0.64 | 2.38±0.60 |
| Surgery                    | 6.73±3.05 | 3.50±0.54 | 3.05±0.63 | 2.45±0.59 |
| Obstetrics and Gynecology  | 6.19±2.71 | 3.54±0.50 | 3.13±0.58 | 2.44±0.56 |
| Pediatrics                 | 7.09±3.23 | 3.47±0.51 | 3.08±0.64 | 2.35±0.67 |
| ENT                        | 5.87±3.20 | 3.56±0.48 | 3.12±0.62 | 2.25±0.54 |
| Other                      | 6.36±3.13 | 3.55±0.55 | 3.11±0.57 | 2.32±0.66 |
| <b>F/t</b>                 | 1.938     | 0.639     | 1.211     | 2.234*    |
| <b>Years of experience</b> |           |           |           |           |
| ≤4                         | 6.26±2.78 | 3.60±0.51 | 3.21±0.58 | 2.37±0.57 |
| 5-10                       | 6.88±3.18 | 3.49±0.55 | 3.06±0.67 | 2.49±0.63 |
| 11-20                      | 6.75±3.10 | 3.45±0.58 | 3.04±0.67 | 2.46±0.59 |
| ≥21                        | 5.94±3.33 | 3.53±0.53 | 3.08±0.65 | 2.18±0.58 |
| <b>F/t</b>                 | 7.859**   | 6.249**   | 6.690**   | 18.233**  |
| <b>Daily working hours</b> |           |           |           |           |
| ≤ 8                        | 6.08±3.01 | 3.65±0.51 | 3.25±0.69 | 2.24±0.59 |
| 8-10                       | 6.53±3.09 | 3.52±0.55 | 3.10±0.64 | 2.41±0.60 |
| 10-12                      | 6.73±2.95 | 3.45±0.49 | 3.05±0.57 | 2.42±0.64 |
| ≥ 12                       | 7.11±3.71 | 3.49±0.58 | 3.10±0.62 | 2.37±0.68 |
| <b>F/t</b>                 | 1.415     | 3.096*    | 2.229     | 2.826*    |

\*\* P < 0.05, \* P < 0.01

1  
2  
3  
4  
5  
6  
7  
8  
9  
10  
11  
12  
13  
14  
15  
16  
17  
18  
19  
20  
21  
22  
23  
24  
25  
26  
27  
28  
29  
30  
31  
32  
33  
34  
35  
36  
37  
38  
39  
40  
41  
42  
43  
44  
45  
46  
47

**Table 3. Pearson correlations among workplace violence, burnout, job satisfaction, perceived organizational support and turnover intention.**

| Variables                               | 1        | 2        | 3        | 4        | 5        | 6        | 7       | 8       | 9       |   |
|-----------------------------------------|----------|----------|----------|----------|----------|----------|---------|---------|---------|---|
| <b>Turnover intention</b>               | 1        |          |          |          |          |          |         |         |         |   |
| <b>Workplace violence</b>               | 0.122**  | 1        |          |          |          |          |         |         |         |   |
| <b>Burnout</b>                          | 0.444**  | 0.206**  | 1        |          |          |          |         |         |         |   |
| <b>Emotional exhaustion</b>             | 0.418**  | 0.213**  | 0.792**  | 1        |          |          |         |         |         |   |
| <b>Depersonalization</b>                | 0.460**  | 0.220**  | 0.846**  | 0.754**  | 1        |          |         |         |         |   |
| <b>Reduced Personal Accomplishment</b>  | 0.102**  | 0.025    | 0.545**  | 0.017    | 0.116**  | 1        |         |         |         |   |
| <b>Perceived organizational support</b> | -0.379** | -0.172** | -0.527** | -0.445** | -0.495** | -0.216** | 1       |         |         |   |
| <b>Job satisfaction</b>                 | -0.367** | -0.188** | -0.562** | -0.478** | -0.524** | -0.231** | 0.675** | 1       |         |   |
| <b>Intrinsic satisfaction</b>           | -0.330** | -0.171** | -0.532** | -0.441** | -0.493** | -0.232*  | 0.626** | 0.946** | 1       |   |
| <b>Extrinsic satisfaction</b>           | -0.390** | -0.176** | -0.505** | -0.456** | -0.476** | -0.178** | 0.673** | 0.900** | 0.795** | 1 |

\* P<0.05, \*\* P<0.01

### **Pearson correlations between different measurement variables**

Table 3 shows the correlations among the respondents' turnover intention and scores on workplace violence, burnout, job satisfaction, and perceived organizational support. As expected, the level of turnover intention was positively correlated with respondents' scores on workplace violence ( $r = 0.122$ ,  $P < 0.001$ ). Burnout was positively associated with turnover intention ( $r = 0.444$ ,  $P < 0.001$ ). The level of turnover intention was negatively correlated with participants' scores on job satisfaction ( $r = -0.367$ ,  $P < 0.001$ ) and perceived organizational support ( $r = -0.379$ ,  $P < 0.001$ ), respectively.

### **Linear Regression Analysis and Path Analysis of Factors Related to Turnover Intention**

The predicting factors of turnover intention are presented in Table 4. Demographic variables that were significantly related to turnover intention were used as control variables. A technical title had a significant effect on turnover intention in the model (Block 1). As shown in Block 2, workplace violence was positively associated with turnover intention ( $\beta = 0.035$ ,  $P < 0.001$ ). In Block 3, emotional exhaustion ( $\beta = 0.054$ ,  $P < 0.001$ ) and depersonalization ( $\beta = 0.054$ ,  $P < 0.001$ ) were positively associated with turnover intention, whereas extrinsic satisfaction was negatively associated with turnover intention in the regression model ( $\beta = -0.270$ ,  $P < 0.001$ ). As shown in Block 4, perceived organizational support was negatively associated with turnover intention ( $\beta = -0.110$ ,  $P < 0.001$ ).

Path analysis using the SEM was performed, which is shown in Figure 1. workplace violence had a negative effect on job satisfaction, which was mediated through perceived organizational support. The total effect ( $\beta = -0.19$ ) of workplace violence on job satisfaction was comprised of not only its direct effect ( $\beta = -0.12$ ), but also its indirect effect ( $\beta = -0.07 = -0.13 \times 0.50$ ), mediated through perceived organizational support. The total effect ( $\beta = 0.53$ ) of workplace violence on turnover intention comprised its direct effect ( $\beta = 0.36$ ), and its indirect effect ( $\beta = 0.17 = (-0.12) \times 0.19 + (-0.13)$

**Table 4. Predicting factors of turnover intention.**

| Variables                        | Block 1 ( $\beta$ ) | Block 2 ( $\beta$ ) | Block 3 ( $\beta$ ) | Block 4 ( $\beta$ ) |
|----------------------------------|---------------------|---------------------|---------------------|---------------------|
| Age group                        | -0.054              | -0.074*             | -0.058              | -0.055              |
| Level of education               | 0.029               | 0.024               | 0.027               | 0.028               |
| Technical title                  | 0.116**             | 0.120**             | 0.043               | 0.043               |
| Employment role                  | 0.085*              | 0.098**             | 0.147**             | 0.147**             |
| Department                       | 0.021               | 0.042               | 0.008               | 0.007               |
| Years of experience              | 0.033               | 0.036               | 0.005               | 0.002               |
| Daily working hours              | 0.056               | 0.046               | 0.005               | 0.007               |
| Workplace violence               |                     | 0.035**             | 0.006               | 0.005               |
| Emotional exhaustion             |                     |                     | 0.054**             | 0.051**             |
| Depersonalization                |                     |                     | 0.123**             | 0.115**             |
| Reduced Personal Accomplishment  |                     |                     | 0.008               | 0.004               |
| Job satisfaction                 |                     |                     | 0.142               | 0.158               |
| Intrinsic satisfaction           |                     |                     | -0.019              | -0.005              |
| Extrinsic satisfaction           |                     |                     | -0.270**            | -0.231**            |
| Perceived organizational support |                     |                     |                     | -0.110**            |
| <i>F</i>                         | 6.334**             | 10.788**            | 50.041**            | 48.209**            |
| <i>R</i> <sup>2</sup>            | 0.025               | 0.047               | 0.287               | 0.294               |
| $\Delta R^2$                     | 0.025**             | 0.022**             | 0.240**             | 0.007**             |

\*  $P < 0.05$ , \*\*  $P < 0.01$ 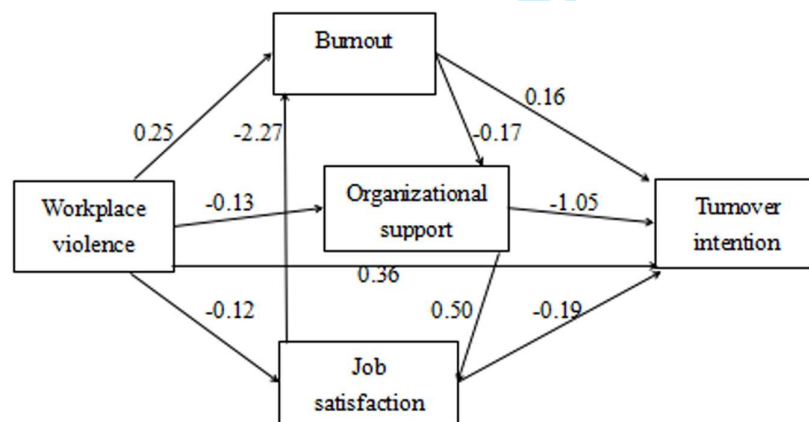**Figure 1. The final model in this study. (CFI = 0.956, GFI = 0.924, IFI = 0.942, NFI=0.931, RMR = 0,050, RMSEA = 0.053, TLI = 0.926)**

Note: CFI, comparative fit index; GFI, goodness of fit index; IFI, incremental fit index; NFI, normed fit index; RMR, root mean square residual; RMSEA, root mean square error of approximation; TLI, Tucker–Lewis incremental fit.

1  
2  
3  $\times (-1.05) + 0.25 \times (-0.17) \times (-1.05) + (-0.13) \times 0.50 \times (-0.19)$ ). Job satisfaction was negatively  
4  
5  
6 associated with burnout. On the other hand, job burnout was positively related to turnover intention.  
7  
8 The squared multiple correlations value was 0.432, which implies that the built SEM explained 43.2%  
9  
10 of the total variance of turnover intention.  
11  
12

## 13 14 **DISCUSSION**

15  
16  
17 In this cross-sectional hospital-based study of nurses, we evaluated the incidence rate of workplace  
18  
19 violence and the mean score of overall perceptions of turnover intention. The total incidence rate of  
20  
21 workplace violence was 63.6% (1120/1761) during the past year. This finding was close to a finding  
22  
23 from a large sample cross-sectional survey on the prevalence of workplace violence among Chinese  
24  
25 nurses.<sup>29</sup> Moreover, the incidence of Chinese nurses experiencing workplace violence is higher than  
26  
27 that of nurses in other countries.<sup>52-53</sup> This may be due to cultural variations across different countries in  
28  
29 terms of workplace violence perceptions, and the variety of assessment scales used in different studies.  
30  
31  
32  
33

34  
35 Although different measurement tools for turnover intention were used in different studies, the  
36  
37 average scores and percentages of perceived high turnover intention have been used as a reference for  
38  
39 measuring potential turnover behavior.<sup>54</sup> The total mean score of overall perception of turnover  
40  
41 intention is greater than 2 points, which means that the turnover intention of nurses is high. Based on  
42  
43 this standard, 545 participants had a low turnover intention, but 1216 (69.1%) participants had a high  
44  
45 turnover intention. Meanwhile, a total of 291 of the 1216 nurses (23.9%) with a higher turnover  
46  
47 intention tended to want to leave more strongly (mean score of turnover intention > 3). The Chinese  
48  
49 nurses intending to leave their current profession was higher than in Malaysia,<sup>15</sup> America,<sup>18</sup> Finland,<sup>18</sup>  
50  
51 and Greece.<sup>18</sup> The reason for this phenomenon may be attributed to two aspects. On the one hand,  
52  
53  
54  
55  
56  
57  
58  
59  
60

1  
2  
3 nursing is a technical, intellectual and practical specialty. With the increase in social demand for nurses,  
4  
5  
6 nurses have certain advantages in obtaining employment. They can more readily find jobs, which  
7  
8  
9 increases the likelihood of nurses leaving their current jobs. On the other hand, the contradiction  
10  
11 between the low social status of nurses and patient expectations is becoming a prominent problem in  
12  
13 China's medical environment, which is leading to a crisis of confidence. It is worth noting that  
14  
15 historical reasons have led to low status and poor professional recognition of Chinese nurses.<sup>20</sup>  
16  
17 However, patients place high demands on the level of health services provided by nurses. This  
18  
19 significant contrast between expectations and reality can easily lead to nurses' resignations. Based on  
20  
21  
22  
23 the present study, more attention need to be paid to nurses in China to reduce their turnover intention.  
24

25  
26 In the univariate analysis, this study found that there were significant differences in self-ratings of  
27  
28 job burnout and job satisfaction among nurses with different technical titles. Furthermore, the results  
29  
30 also indicated that nurses with primary technical titles had higher job burnout and lower job satisfaction.  
31  
32 This finding may be attributed to these nurses often having more direct contact with patients, a busier  
33  
34 work schedule, and work pressure being greater than for nurses with other technical titles. A Pearson  
35  
36 correlation analysis also showed that workplace violence was positively related to job burnout.  
37  
38 Workplace violence not only causes physical and psychological harm to nurses, but also aggravates  
39  
40 nurses' stress and reluctance to work,<sup>29</sup> resulting in an increase in burnout. This study also found that  
41  
42 burnout has a negative impact on the job satisfaction of nurses, which is consistent with previous  
43  
44 studies.<sup>19 32</sup> The higher the level of burnout, the lower the job satisfaction of nurses. This may be related  
45  
46 to the particularity of the nurses' profession, which requires nurses to have a keen sense of  
47  
48 responsibility, high professional skills, carefulness and patience, and nurses work in stressful  
49  
50 conditions for prolonged periods. Furthermore, a crisis of trust has emerged in China's medical  
51  
52  
53  
54  
55  
56

1  
2  
3 environment, so nurses need to spend a lot of emotional labor in dealing with the relationship between  
4  
5  
6 nurses and patients. However, positive feedback is rarely received and patient mistrust often remains,  
7  
8  
9 resulting in a state of emotional exhaustion and reduced personal accomplishment, which then  
10  
11  
12 negatively affects the judgment of nurses concerning their work environment and conditions, reducing  
13  
14  
15 in turn the level of their job satisfaction.

16  
17 Previous studies have mentioned a series of influencing factors regarding turnover intention in  
18  
19 other countries or areas.<sup>14-18</sup> According to linear regression analysis, Block 1 showed that technical  
20  
21 titles and employment roles are two important demographic variables that affect nurses' turnover  
22  
23 intention, which is different from the findings of Almalki *et al.*'s study.<sup>14</sup> The results of single factor  
24  
25 analysis indicated that nurses with lower-level professional titles had a higher turnover intention, and  
26  
27 full-time employed nurses had a lower turnover intention than temporarily employed nurses. This may  
28  
29 be attributed to nurses with low professional titles being generally in first-line clinical work, facing a  
30  
31 heavy workload and finding it difficult to cope with the patients or their relatives. They are confronted  
32  
33 with an imbalance between pay and return, as well as social ignorance of their role, which affects their  
34  
35 work enthusiasm, and thereby increasing the possibility of leaving. In addition, the temporarily  
36  
37 employed nurses' income is unstable and these nurses do not have a strong sense of belonging to the  
38  
39 hospital, so a turnover intention possibility is stronger. In Block 2, workplace violence had a significant  
40  
41 effect on turnover intention, which was consistent with earlier findings.<sup>20 30 32 55</sup> Workplace violence is a  
42  
43 particularly shocking event within our model. Workplace violence can provoke in nurses a sense of  
44  
45 extreme insecurity and reduced self-value which may directly lead to a turnover intention. Path  
46  
47 analysis stated clearly that perceived organizational support played a moderating role in the impact of  
48  
49 workplace violence on turnover intention. At the same time, in the Pearson correlation and linear  
50  
51  
52  
53  
54  
55  
56  
57  
58  
59  
60



1  
2  
3 regression analysis, perceived organizational support had a negative influence on turnover intention,  
4  
5  
6 that is, the higher the sense of organizational support, the lower the turnover intention. The  
7  
8 psychological mechanism embodied in the perceived organizational support is the social exchange  
9  
10 between employees and organizations.<sup>56</sup> From the view of social exchange, the exchange consciousness  
11  
12 of employees concerning perceived organizational support depends entirely on the level of that  
13  
14 organizational support. The fundamental reason employees are willing to stay in an organization is that  
15  
16 they feel the contributions of employees to the organization are equal or fair in respect of what they  
17  
18 receive in return from the relevant organization. After workplace violence has occurred, hospitals need  
19  
20 to provide care and support to nurses as far as possible to reduce the harm of violence inflicted on them,  
21  
22 which, in turn, is likely to increase their emotional commitment to the hospital, and reduce the  
23  
24 possibility of leaving. Therefore, the hospital should provide active support measures, including: giving  
25  
26 respect, welfare support, and practical support; effectively conveying the support of upper management;  
27  
28 ensuring a relationship of trust and support between employees and their immediate supervisors;  
29  
30 emphasizing procedural justice in the organization; and creating a supportive organizational climate.  
31  
32 These measures are likely to encourage nurses to stay in their present position and improve their job  
33  
34 satisfaction, thus reducing their turnover rate.<sup>22,35,42</sup>

35  
36  
37  
38  
39  
40  
41  
42 Our findings showed that job burnout is positively related to turnover intention, which is similar  
43  
44 to previous results.<sup>16,21,32,39</sup> The results of linear regression analysis also demonstrated that emotional  
45  
46 burnout and depersonalization had a significant influence on turnover intention. At present, there are  
47  
48 various theories and models (for example, the conservation of resources theory,<sup>57</sup> the job  
49  
50 demand-resource model,<sup>58</sup> and the effort-reward imbalance model<sup>59</sup>) which have been used to explain  
51  
52  
53  
54  
55  
56  
57  
58  
59  
60  
burnout. One aspect in common arising from these theories involves an employee's experiencing a

1  
2  
3 sense of inconsistency in relation to what the job promises and what it delivers, which leads to job  
4  
5  
6 burnout. Nurses often face shocking events, for example, workplace violence and organizational  
7  
8 injustice, during their work, and negative attitudes, for example patient mistrust, which fosters job  
9  
10 burnout, affecting their work enthusiasm and work quality, and increasing the possibility of leaving.  
11  
12  
13 <sup>57-59</sup> Another noteworthy result of our study was that job satisfaction was found to be negatively related  
14  
15 to turnover intention, similar to previous results.<sup>3 5 15 17 19</sup> Therefore, hospitals should pay greater  
16  
17 attention to the working conditions and health status of nurses, and increase their job satisfaction and  
18  
19 sense of organizational belonging, to reduce their job burnout and turnover intention.  
20  
21  
22

23 The present study has several limitations. First, we collected data concerning whether nurses had  
24  
25 experienced workplace violence in the last 12 months, so there may be recall bias in the results.  
26  
27  
28 Second, purposive sampling results are greatly influenced due to the preconceptions of researchers. To  
29  
30 the extent that subjective judgment may be biased, this can readily lead to sampling bias and cannot  
31  
32 provide complete confidence in the results of the overall investigation. Thus, the researchers involved  
33  
34 clearly understand the basic characteristics of the population under investigation, so that the selected  
35  
36 samples can be representative and typical.  
37  
38  
39

## 40 CONCLUSIONS

41  
42 In this study, the turnover intention of nurses in tertiary hospitals was found to be close to our expected  
43  
44 results. The results of our study suggest that job satisfaction and organizational support can reduce  
45  
46 nurses' turnover intention. A series of measures, for example, to provide material improvements and  
47  
48 psychological/emotional support, and to facilitate greater organizational justice, should be undertaken  
49  
50 by hospital administrations to improve nurses' sense of organizational belonging and job satisfaction,  
51  
52 reduce the loss of nursing human resources and foster the job stability of nurses.  
53  
54  
55  
56

### Acknowledgments

The authors thank all the nurses, managers and Chinese Hospital Association for their assistance and support for this project.

### Author Contributions

LF, TS and XN designed the study. WL, LS, ZZ, XL, XJ, and LL collected data. WL, SZ, LS, XD, GL, LL and FL analysed the data. WL, SZ and LS drafted the manuscript. WL, LF, TS and XN revised the manuscript.

### Funding

This study was funded by the National Natural Science Foundation of China (NSFC), grant number 71473063.

**Competing interests** None declared.

**Data sharing statement** No additional data are available.

### REFERENCES

1. National Health and Family Planning Commission of the People's Republic of China. National nursing development program (2016-2020). [internet] <http://www.nhfpc.gov.cn/zyygj/s3593/201611/92b2e8f8cc644a899e9d0fd572aefef3.Shtml>.
2. Xiaoyan W. Analysis of the situation of nursing human resources in public hospitals. *The World Clinical Medicine* 2016;10(4):247-248.
3. Chao MC, Jou RC, Liao CC, *et al*. Workplace stress, job satisfaction, job performance, and

- 1  
2  
3 turnover intention of health care workers in rural Taiwan. *Asia Pac J Public Health* 2015;  
4  
5  
6 27:NP1827-NP1836.  
7  
8  
9 4. March JG, Simon HA. *Organizations*. New York: Wiley, 1958.  
10  
11 5. Mobley WH. Intermediate linkages in the relationship between job satisfaction and employee  
12  
13 turnover. *Journal of Applied Psychology* 1977;62:237-240.  
14  
15  
16 6. Mobley WH, Horner SO, Hollingsworth AT. An evaluation of precursors of hospital employee  
17  
18 turnover. *Journal of Applied Psychology* 1978;63:408-414.  
19  
20  
21 7. Mobley WH, Griffeth RW, Hand HH, *et al*. Review and conceptual analysis of the employee  
22  
23 turnover process. *Psychol Bull* 1979;86:493-522.  
24  
25  
26 8. Bluedorn AC. A unified model of turnover from organizations. *Human Relations* 1982;35:135-  
27  
28 53.  
29  
30  
31 9. Sheridan JE, Abelson MA. Cusp catastrophe model of employee turnover. *Academy of*  
32  
33 *Management Journal* 1983;26:418-36.  
34  
35  
36 10. Lee TW, Mitchell TR. An alternative approach: the unfolding model of voluntary employee  
37  
38 turnover. *Academy of Management Review* 1994;1:51-89.  
39  
40  
41 11. Price JL. *The study of turnover*. Iowa State University Press: Ames 1977.  
42  
43 12. Price JL. *The development of a causal model of voluntary turnover*. Iowa State University Press:  
44  
45 Ames 2000.  
46  
47  
48 13. Griffeth RW, Hom PW, Gaertner S. A meta-analysis of antecedents and correlates of employee  
49  
50 turnover: update, moderator tests, and research implications for the next millennium. *Journal of*  
51  
52 *Management* 2000;26(3):463-488.  
53  
54  
55 14. Almalki MJ, Gerry FG, Michele C. The relationship between quality of work life and turnover  
56  
57  
58  
59  
60

- 1  
2  
3 intention of primary health care nurses in Saudi Arabia. *BMC Health Serv Res* 2012;12(1):314.  
4  
5  
6 15. Ramoo V, Abdullah KL, Piaw CY. The relationship between job satisfaction and intention to  
7  
8 leave current employment among registered nurses in a teaching hospital. *J Clin Nurs* 2013;  
9  
10 22(21-22):3141-3152.  
11  
12  
13 16. Yoon GS, Kim SY. Influences of Job Stress and Burnout on Turnover Intention of Nurses. *J*  
14  
15 *Korean Acad Nurs Admin* 2010;16(4):507-516.  
16  
17  
18 17. Coomber B, Barriball KL. Impact of job satisfaction components on intent to leave and turnover  
19  
20 for hospital-based nurses:A review of the research literature. *Int J Nurs Stud* 2007;44(2):297-314.  
21  
22  
23 18. Aiken LH, Sermeus W, Van den Heede K, *et al.* Patient safety, satisfaction, and quality of  
24  
25 hospital care: cross sectional surveys of nurses and patients in 12 countries in Europe and the  
26  
27 United States. *BMJ* 2012;344:e1717.  
28  
29  
30 19. Li L, Hu H, Zhou H, *et al.* Work stress, work motivation and their effects on job satisfaction in  
31  
32 community health workers: a cross-sectional survey in China. *BMJ Open* 2014;4(6):e004897.  
33  
34  
35 20. Fang B. Study on the correlation between nurses' intention to leave and workplace violence.  
36  
37 *Hainan Medical Journal* 2013;24 (22):3413-3414.  
38  
39  
40 21. Oyeleye O, Hanson P, O'Connor N, *et al.* Relationship of workplace incivility, stress, and  
41  
42 burnout on nurses' turnover intentions and psychological empowerment. *J Nurs Admin* 2013;  
43  
44 43(10):536 -542.  
45  
46  
47 22. Abou Hashish E A. Relationship between ethical work climate and nurses' perception of  
48  
49 organizational support, commitment, job satisfaction and turnover intent. *Nurs Ethics* 2015;1-16.  
50  
51  
52 23. Schablon A, Zeh A, Wendeler D, *et al.* Frequency and consequences of violence and aggression  
53  
54 towards employees in the German healthcare and welfare system: a cross-sectional study. *BMJ*  
55  
56

- 1  
2  
3  
4 *Open* 2011;2(5):421-421.
- 5  
6 24. Sato K, Wakabayashi T, Kiyoshi-Teo H, *et al.* Factors associated with nurses' reporting of  
7  
8 patients' aggressive behavior: A cross-sectional survey. *Int J Nurs Stud* 2013;50(10):1368.  
9
- 10  
11 25. Lei S, Min H, Tao S, *et al.* Analysis of the status quo and risk factors of workplace violence  
12  
13 among nurses in county hospitals. *Chinese Nursing Research* 2017;31(5):592-594.  
14
- 15  
16 26. Choi S, Lee H. Workplace violence against nurses in Korea and its impact on professional  
17  
18 quality of life and turnover intention. *Journal of Nursing Management* 2017;1-11.  
19
- 20  
21 27. Jia XL, Zhou HZ, Zhao Y, *et al.* Investigation on hospital violence during 2003 to 2012 in  
22  
23 China. *Chinese Hospitals* 2014;18(3):1-3.  
24
- 25  
26 28. Boyle MJ, Wallis J. Working towards a definition for workplace violence actions in the health  
27  
28 sector. *Safety in Health* 2016;2(1):4.  
29
- 30  
31 29. Shi L, Zhang D, Zhou C, *et al.* A cross-sectional study on the prevalence and associated risk  
32  
33 factors for workplace violence against Chinese nurses. *BMJ open* 2017;7(6):e013105.  
34
- 35  
36 30. Christensen MP. Relationships between workplace violence, burnout, and intent to leave in  
37  
38 emergency department nurses. *Dissertations & Theses-Gradworks* 2014;21(21):984-90.  
39
- 40  
41 31. Kim JI, Kim TS. Violence episodes and turnover among clinical nurses. *Journal of Korean*  
42  
43 *Academy of Nursing Administration* 2004;10(4):427-436.  
44
- 45  
46 32. Mcdowell SS. Client-Inflicted Workplace Violence, Burnout, Job Satisfaction, and Turnover  
47  
48 Intention: A Comparative Analysis Between Institution-Based and Home-Based Direct Care  
49  
50 Paraprofessionals. *Dissertations & Theses - Gradworks* 2015;208.  
51
- 52  
53 33. Utriainen K, Kyngäs H. Hospital nurses' job satisfaction: a literature review. *J Nurs Manag*  
54  
55 2009;17:1002-1010.  
56  
57  
58  
59  
60

- 1  
2  
3  
4 34. Tnay E, Othman AEA, Siong HC, *et al.* The Influences of Job Satisfaction and Organizational  
5  
6 Commitment on Turnover Intention. *Procedia Social and Behavioral Sciences* 2013;97(2):201-  
7  
8 208.  
9  
10  
11 35. Islam T, Latif I, Ali G. The relationship between perceived organizational support and turnover  
12  
13 intention: mediating role of affective commitment and job satisfaction. *Research Journal of*  
14  
15 *Applied Sciences Engineering & Technology* 2014;8(24):2422-2425.  
16  
17  
18 36. Samad S, Yasmin S, Yusuf M. The Role of Organizational Commitment in Mediating the  
19  
20 Relationship between Job Satisfaction and Turnover Intention. *European Journal of Social*  
21  
22 *Sciences* 2012;30(2):135-137.  
23  
24  
25 37. Yücel I. Examining the Relationships among Job Satisfaction, Organizational Commitment, and  
26  
27 Turnover Intention: An Empirical Study. *International Journal of Business & Management*  
28  
29 2012;7(20):1-15.  
30  
31  
32 38. Maslach C, Jackson SE. The measurement of experienced burnout. *Journal of Organizational*  
33  
34 *Behavior* 1981;2(2):99-113.  
35  
36  
37 39. Shimizu T, Feng Q, Nagata S. Relationship between turnover and burnout among Japanese  
38  
39 hospital nurses. *J Occup Health* 2005;47(4):334.  
40  
41  
42 40. Rhoades L, Eisenberger R. Perceived organizational support: A review of the literature. *Journal*  
43  
44 *of Applied Psychology* 2002;87(4):698-714.  
45  
46  
47 41. Dawley D, Houghton JD, Bucklew NS. Perceived organizational support and turnover intention:  
48  
49 the mediating effects of personal sacrifice and job fit. *Journal of Social Psychology* 2010;150(3):  
50  
51 238-257.  
52  
53  
54 42. Tumwesigye G. The relationship between perceived organizational support and turnover  
55  
56

- 1  
2  
3 intentions in a developing country: The mediating role of organizational commitment. *African*  
4  
5  
6 *Journal of Business Management* 2010;4(6):942-952.  
7
- 8 43 ILO/ICN/WHO/PSI. Framework Guidelines for Addressing Workplace Violence in the Health  
9  
10 Sector. Geneva: ILO/ICN/WHO/PSI Joint Programme on Workplace Violence in the Health  
11  
12 Sector; 2002.  
13
- 14  
15 44. Richardsen AM, Martinussen M. Factorial validity and consistency of the MBI-GS across  
16  
17 occupational groups in Norway[J]. *International Journal of Stress Management* 2005;  
18  
19 12(3):289-297.  
20  
21
- 22  
23 45. Li YX, Zhang K, Zhao GX. Confirmatory factor analysis of job burnout. *Psychological*  
24  
25 *Exploration (in China)* 2005;4:70-74.  
26  
27
- 28 46. Li CP, Shi K. The influence of distributive justice and procedural justice on Job Burnout. *Acta*  
29  
30 *Psychologica Sinica* 2003;35(5):677-684.  
31  
32
- 33 47. Lin Y, Jing-Xiang MA, Chen WQ, et al. Relationship between Perception of Job Characteristics  
34  
35 and Job Satisfaction of Pediatric Nurses. *Journal of Nursing* 2013.  
36  
37
- 38 48. Hirschfeld RR. Does Revising the Intrinsic and Extrinsic Subscales of the Minnesota Satisfaction  
39  
40 Questionnaire Short Form Make a Difference? *Educational & Psychological Measurement*  
41  
42 2000;60(60):255-270.  
43  
44
- 45 49. Chen ZX, Aryee S, Lee C. Test of a mediation model of perceived organizational support.  
46  
47 *Journal of Vocational Behavior* 2005;66(3):457-470.  
48  
49
- 50 50. Lee G, Lee D. A study on the relationships among role conflict, organizational commitment and  
51  
52 intent to quit matrix organizational structure: using employees from industrial technology  
53  
54 research institute as example. *Graduate School of management, National Chiao Tung*  
55  
56



- 1  
2  
3  
4 *University* 2000.
- 5  
6 51. Zhao X, Sun T, Cao Q, *et al.* The impact of quality of work life on job embeddedness and  
7  
8 affective commitment and their co-effect on turnover intention of nurses. *J Clin Nurs* 2013;  
9  
10 22 (5-6):780-788.
- 11  
12  
13 52. Tiruneh BT, Biftu BB, Tumebo AA, *et al.* Prevalence of workplace violence in Northwest  
14  
15 Ethiopia: a multivariate analysis. *BMC Nurs* 2016;15:1-6.
- 16  
17  
18 53. Franz S, Zeh A, Schablon A, *et al.* Aggression and violence against health care workers in  
19  
20 Germany-a cross sectional retrospective survey. *BMC Health Serv Res* 2010;10:51.
- 21  
22  
23 54. Gu St, Huang QM, Chen ZHQ, *et al.* Relationship between job satisfaction and turnover  
24  
25 intention among physicians from three grade hospitals. *Chinese Journal of Hospital*  
26  
27 *Administration* 2006;9:586-589.
- 28  
29  
30 55. Choi SH, Lee H. Workplace violence against nurses in Korea and its impact on professional  
31  
32 quality of life and turnover intention. *J Nurs Manage* 2017.
- 33  
34  
35 56. Settoon RP, Bennett N, Liden RC. Social exchange in organizations: Perceived organizational  
36  
37 support, leader - member exchange, and employee reciprocity. *Social Science Electronic*  
38  
39 *Publishing* 2014;81(3):219-227.
- 40  
41  
42 57. Hobfoll SE. The influence of culture, community, and the nested-self in the stress process:  
43  
44 Advancing Conservation of Resources theory. *Applied Psychology* 2001; 50(3):337-421.
- 45  
46  
47 58. Yom YH. Analysis of burnout and job satisfaction among nurses based on the Job  
48  
49 Demand-Resource Model. *J Koren Acad Nurs* 2013;43(1):114-122.
- 50  
51  
52 59. Siegrist J, Starke D, Chandola T, *et al.* The measurement of effort-reward imbalance at work:  
53  
54 European comparisons. *Soc Sci Med* 2004;58(8):1483-1499.
- 55  
56  
57  
58  
59  
60

STROBE 2007 (v4) Statement—Checklist of items that should be included in reports of *cross-sectional studies*

| Section/Topic                | Item # | Recommendation                                                                                                                                                                       | Reported on page #          |
|------------------------------|--------|--------------------------------------------------------------------------------------------------------------------------------------------------------------------------------------|-----------------------------|
| Title and abstract           | 1      | (a) Indicate the study's design with a commonly used term in the title or the abstract                                                                                               | Page 2, line 4-9            |
|                              |        | (b) Provide in the abstract an informative and balanced summary of what was done and what was found                                                                                  | P. 3 ; p.4, line 4-17       |
| <b>Introduction</b>          |        |                                                                                                                                                                                      |                             |
| Background/rationale         | 2      | Explain the scientific background and rationale for the investigation being reported                                                                                                 | P. 5; p. 6; p. 7, line 4-49 |
| Objectives                   | 3      | State specific objectives, including any prespecified hypotheses                                                                                                                     | P. 7, line 52-57            |
| <b>Methods</b>               |        |                                                                                                                                                                                      |                             |
| Study design                 | 4      | Present key elements of study design early in the paper                                                                                                                              | P. 8, line 9                |
| Setting                      | 5      | Describe the setting, locations, and relevant dates, including periods of recruitment, exposure, follow-up, and data collection                                                      | P. 8, line 9-42             |
| Participants                 | 6      | (a) Give the eligibility criteria, and the sources and methods of selection of participants                                                                                          | P. 8, line 42-54; p.9, 14   |
| Variables                    | 7      | Clearly define all outcomes, exposures, predictors, potential confounders, and effect modifiers. Give diagnostic criteria, if applicable                                             | P. 9, line 4-24             |
| Data sources/<br>measurement | 8*     | For each variable of interest, give sources of data and details of methods of assessment (measurement). Describe comparability of assessment methods if there is more than one group | P. 9; p.9; p.10             |

1  
2  
3  
4  
5  
6  
7  
8  
9  
10  
11  
12  
13  
14  
15  
16  
17  
18  
19  
20  
21  
22  
23  
24  
25  
26  
27  
28  
29  
30  
31  
32  
33  
34  
35  
36  
37  
38  
39  
40  
41  
42  
43  
44  
45  
46  
47

|                        |     |                                                                                                                                                                                                   |                                         |
|------------------------|-----|---------------------------------------------------------------------------------------------------------------------------------------------------------------------------------------------------|-----------------------------------------|
| Bias                   | 9   | Describe any efforts to address potential sources of bias                                                                                                                                         | P.4, line 4-17                          |
| Study size             | 10  | Explain how the study size was arrived at                                                                                                                                                         | P. 8, line 14-19                        |
| Quantitative variables | 11  | Explain how quantitative variables were handled in the analyses. If applicable, describe which groupings were chosen and why                                                                      | p. 12, line9-14                         |
| Statistical methods    | 12  | (a) Describe all statistical methods, including those used to control for confounding                                                                                                             | P. 12, line 4-50                        |
|                        |     | (b) Describe any methods used to examine subgroups and interactions                                                                                                                               | P. 12, line 4-19                        |
|                        |     | (c) Explain how missing data were addressed                                                                                                                                                       | P. 12, line 4-9                         |
|                        |     | (d) If applicable, describe analytical methods taking account of sampling strategy                                                                                                                | P. 12, line 4-16                        |
|                        |     | (e) Describe any sensitivity analyses                                                                                                                                                             | P. 12, line 14-32                       |
| <b>Results</b>         |     |                                                                                                                                                                                                   |                                         |
| Participants           | 13* | (a) Report numbers of individuals at each stage of study—eg numbers potentially eligible, examined for eligibility, confirmed eligible, included in the study, completing follow-up, and analysed | P. 8, line 37-42                        |
|                        |     | (b) Give reasons for non-participation at each stage                                                                                                                                              | P. 8, line 42-54                        |
|                        |     | (c) Consider use of a flow diagram                                                                                                                                                                | No                                      |
| Descriptive data       | 14* | (a) Give characteristics of study participants (eg demographic, clinical, social) and information on exposures and potential confounders                                                          | P. 13, line 27-59;<br>P. 14, line 3-27; |
|                        |     | (b) Indicate number of participants with missing data for each variable of interest                                                                                                               | P.8, line 38                            |
| Outcome data           | 15* | Report numbers of outcome events or summary measures                                                                                                                                              | P. 15; P. 16; P. 17;<br>P. 19           |

|                                                    |                          |    |                                                                                                                                                                                                              |                                                             |
|----------------------------------------------------|--------------------------|----|--------------------------------------------------------------------------------------------------------------------------------------------------------------------------------------------------------------|-------------------------------------------------------------|
| 1<br>2<br>3<br>4<br>5<br>6<br>7                    | Main results             | 16 | (a) Give unadjusted estimates and, if applicable, confounder-adjusted estimates and their precision (eg, 95% confidence interval). Make clear which confounders were adjusted for and why they were included | P. 18, line 20-58;<br>p. 20, line 4-12                      |
| 8<br>9                                             |                          |    | (b) Report category boundaries when continuous variables were categorized                                                                                                                                    | P. 14, line 15-26                                           |
| 10<br>11                                           |                          |    | (c) If relevant, consider translating estimates of relative risk into absolute risk for a meaningful time period                                                                                             | P. 17, p.18                                                 |
| 12<br>13<br>14<br>15                               | Other analyses           | 17 | Report other analyses done—eg analyses of subgroups and interactions, and sensitivity analyses                                                                                                               | P. 14, line 29-57;<br>P. 18, line 3-18                      |
| 16<br>17                                           | <b>Discussion</b>        |    |                                                                                                                                                                                                              |                                                             |
| 18<br>19<br>20<br>21<br>22                         | Key results              | 18 | Summarise key results with reference to study objectives                                                                                                                                                     | P. 20, line 15-57;<br>p. 22. Line 17-57;<br>P. 23           |
| 23<br>24<br>25                                     | Limitations              | 19 | Discuss limitations of the study, taking into account sources of potential bias or imprecision. Discuss both direction and magnitude of any potential bias                                                   | P. 24, Line 24-39                                           |
| 26<br>27<br>28<br>29<br>30                         | Interpretation           | 20 | Give a cautious overall interpretation of results considering objectives, limitations, multiplicity of analyses, results from similar studies, and other relevant evidence                                   | P. 20, line 19-57;<br>p.21; p.21; p. 22;<br>P. 24, line4-22 |
| 31<br>32<br>33<br>34<br>35                         | Generalisability         | 21 | Discuss the generalisability (external validity) of the study results                                                                                                                                        | P. 23, line 29-42;<br>P. 24, line 17-22, 44-57              |
| 36<br>37<br>38                                     | <b>Other information</b> |    |                                                                                                                                                                                                              |                                                             |
| 39<br>40<br>41<br>42<br>43<br>44<br>45<br>46<br>47 | Funding                  | 22 | Give the source of funding and the role of the funders for the present study and, if applicable, for the original study on                                                                                   | P. 25, line 24-29                                           |

1  
2  
3  
4  
5  
6  
7  
8  
9  
10  
11  
12  
13  
14  
15  
16  
17  
18  
19  
20  
21  
22  
23  
24  
25  
26  
27  
28  
29  
30  
31  
32  
33  
34  
35  
36  
37  
38  
39  
40  
41  
42  
43  
44  
45  
46  
47

|  |  |                                    |  |
|--|--|------------------------------------|--|
|  |  | which the present article is based |  |
|--|--|------------------------------------|--|

\*Give information separately for cases and controls in case-control studies and, if applicable, for exposed and unexposed groups in cohort and cross-sectional studies.

**Note:** An Explanation and Elaboration article discusses each checklist item and gives methodological background and published examples of transparent reporting. The STROBE checklist is best used in conjunction with this article (freely available on the Web sites of PLoS Medicine at <http://www.plosmedicine.org/>, Annals of Internal Medicine at <http://www.annals.org/>, and Epidemiology at <http://www.epidem.com/>). Information on the STROBE Initiative is available at [www.strobe-statement.org](http://www.strobe-statement.org).

For peer review only

# BMJ Open

## Workplace violence, job satisfaction, burnout, perceived organizational support and their effects on turnover intention among Chinese nurses in tertiary hospitals: a cross-sectional study

|                                 |                                                                                                                                                                                                                                                                                                                                                                                                                                                                                                                                                                                                                                                                                                                                                                                                                                                                                                                                                                                                                                                                                                                                                                                                                                                                                                                                                                                                                                                 |
|---------------------------------|-------------------------------------------------------------------------------------------------------------------------------------------------------------------------------------------------------------------------------------------------------------------------------------------------------------------------------------------------------------------------------------------------------------------------------------------------------------------------------------------------------------------------------------------------------------------------------------------------------------------------------------------------------------------------------------------------------------------------------------------------------------------------------------------------------------------------------------------------------------------------------------------------------------------------------------------------------------------------------------------------------------------------------------------------------------------------------------------------------------------------------------------------------------------------------------------------------------------------------------------------------------------------------------------------------------------------------------------------------------------------------------------------------------------------------------------------|
| Journal:                        | <i>BMJ Open</i>                                                                                                                                                                                                                                                                                                                                                                                                                                                                                                                                                                                                                                                                                                                                                                                                                                                                                                                                                                                                                                                                                                                                                                                                                                                                                                                                                                                                                                 |
| Manuscript ID                   | bmjopen-2017-019525.R1                                                                                                                                                                                                                                                                                                                                                                                                                                                                                                                                                                                                                                                                                                                                                                                                                                                                                                                                                                                                                                                                                                                                                                                                                                                                                                                                                                                                                          |
| Article Type:                   | Research                                                                                                                                                                                                                                                                                                                                                                                                                                                                                                                                                                                                                                                                                                                                                                                                                                                                                                                                                                                                                                                                                                                                                                                                                                                                                                                                                                                                                                        |
| Date Submitted by the Author:   | 30-Nov-2017                                                                                                                                                                                                                                                                                                                                                                                                                                                                                                                                                                                                                                                                                                                                                                                                                                                                                                                                                                                                                                                                                                                                                                                                                                                                                                                                                                                                                                     |
| Complete List of Authors:       | Liu, Wenhui; Harbin Medical University School of Public Health, Department of Health Management<br>Zhao, Shihong; The Second Affiliated Hospital of Harbin Medical University, Department of Neurosurgery<br>Shi, Lei; School of Public Health, Harbin Medical University, Department of Health Management<br>Zhang, Zhong; School of Public Health, Harbin Medical University, Department of Medical Education<br>Liu, Xinyan; Harbin Medical University, Department of Medical Education, School of Public Health<br>Li, Li; School of Public Health, Harbin Medical University, Department of Health Management<br>Duan, Xiaojian; School of Public Health, Harbin Medical University, Department of Health Management<br>Li, Guoqiang; Harbin Medical University, Department of Health Management, School of Public Health<br>Lou, Fengge; School of Public Health, Qiqihar Medical University, Department of Public Health Research<br>Jia, Xiaoli; Chinese Hospital Association, Department of Autonomous Protection<br>Fan, Lihua; Harbin Medical University, Department of Health Management, School of Public Health; School of Public Health, Harbin Medical University, Department of Medical Education<br>Sun, Tao; Harbin Medical University School of Public Health,<br>Ni, Xin; National Center for Children's Health, Beijing Children's Hospital affiliated to Capital Medical University, Department of the Hospital Director |
| <b>Primary Subject Heading</b>: | Health policy                                                                                                                                                                                                                                                                                                                                                                                                                                                                                                                                                                                                                                                                                                                                                                                                                                                                                                                                                                                                                                                                                                                                                                                                                                                                                                                                                                                                                                   |
| Secondary Subject Heading:      | Health policy, Health services research, Nursing, Medical management                                                                                                                                                                                                                                                                                                                                                                                                                                                                                                                                                                                                                                                                                                                                                                                                                                                                                                                                                                                                                                                                                                                                                                                                                                                                                                                                                                            |
| Keywords:                       | Workplace violence, job satisfaction, burnout, organizational support, turnover intention, nurses                                                                                                                                                                                                                                                                                                                                                                                                                                                                                                                                                                                                                                                                                                                                                                                                                                                                                                                                                                                                                                                                                                                                                                                                                                                                                                                                               |
|                                 |                                                                                                                                                                                                                                                                                                                                                                                                                                                                                                                                                                                                                                                                                                                                                                                                                                                                                                                                                                                                                                                                                                                                                                                                                                                                                                                                                                                                                                                 |

1  
2  
3  
4  
5  
6  
7  
8  
9  
10  
11  
12  
13  
14  
15  
16  
17  
18  
19  
20  
21  
22  
23  
24  
25  
26  
27  
28  
29  
30  
31  
32  
33  
34  
35  
36  
37  
38  
39  
40  
41  
42  
43  
44  
45  
46  
47  
48  
49  
50  
51  
52  
53  
54  
55  
56  
57  
58  
59  
60

SCHOLARONE™  
Manuscripts

For peer review only

1  
2  
3  
4  
5  
6  
7  
8  
9  
10  
11  
12  
13  
14  
15  
16  
17  
18  
19  
20  
21  
22  
23  
24  
25  
26  
27  
28  
29  
30  
31  
32  
33  
34  
35  
36  
37  
38  
39  
40  
41  
42  
43  
44  
45  
46  
47  
48  
49  
50  
51  
52  
53  
54  
55  
56  
57  
58  
59  
60

For peer review only



**Abstract****Objective**

Our aim was to assess the relationship between workplace violence, job satisfaction, burnout, organizational support, and turnover intention, and explore factors associated with turnover intention among nurses in Chinese tertiary hospitals.

**Methods**

The purposive sampling method was used to collect data from August 2016 through January 2017. A total of 1761 nurses from 9 public tertiary hospitals in 4 provinces (municipalities) located in eastern (Beijing), central (Heilongjiang, Anhui), and western (Shaanxi) of China completed the questionnaires (effective response rate = 85.20%). A cross-sectional study was conducted using the Workplace Violence Scale, Chinese Maslach Burnout Inventory General Survey, Minnesota Job Satisfaction Questionnaire Revised Short Version, Perceived Organizational Support–Simplified Version Scale, and Turnover Intention Scale.

**Results**

A total of 1216 of 1706 (69.1%) participants had high turnover intention. During the previous 12 months, the prevalence of physical violence and psychological violence toward nurses was 9.60% and 59.64%, respectively. As expected, the level of turnover intention was negatively correlated with participants' scores on job satisfaction ( $r = -0.367$ ,  $P < 0.001$ ) and perceived organizational support ( $r = -0.379$ ,  $P < 0.001$ ), respectively. Burnout was positively associated with turnover intention ( $r = 0.444$ ,  $P < 0.001$ ). Workplace violence was positively associated with turnover intention ( $\beta = 0.035$ ,  $P < 0.001$ ) in linear regression analysis. The total effect ( $\beta = 0.53$ ) of workplace violence on turnover intention comprised its direct effect ( $\beta = 0.36$ ), and its indirect effect ( $\beta = 0.17$ ).

## Conclusions

The turnover intention of nurses in tertiary hospitals is close to our expected results in the present study.

A series of measures, for example, to provide material improvements and psychological/emotional support, to facilitate greater organizational justice, to prevent the occurrence of workplace violence, and to relieve the job burnout of nurses should be undertaken by hospital administrations. The hospital can improve nurses' sense of organizational belonging, reduce the loss of nursing human resources and foster the job stability of nurses.

## Strengths and limitations of this study

- The aim was to explore factors associated with turnover intention among nurses in Chinese tertiary hospitals.
- A variety of statistical methods were employed to investigate the relationship between independent variables and turnover intention.
- The retrospective approach to collecting data using self-reports of workplace violence might have led to recall and report bias.
- The results of purposive sampling were greatly influenced due to the preconceptions of the researchers. Therefore, the researchers need to clearly understand the basic characteristics of the population under study.

## INTRODUCTION

A nursing shortage is occurring worldwide and is arousing great concern.<sup>1</sup> The European Commission reported that 590,000 nurses would be shortage by the end of 2020.<sup>2</sup> In the United States, by the end of 2020, the nursing shortage will reach 340,000 nurses.<sup>3</sup> In 2016, the total number of registered nurses in China reached 3.507 million. Compared with 2010, the number of registered nurses per 1,000 people increased from 1.52 to 2.54.<sup>4</sup> The ratio of physicians to nurses in China has increased from 1:1.16 in 2010 to 1:45 in 2016, and the inverse ratio of physician and nurse was fundamentally reversed for a long time.<sup>4</sup> In 2001–2002, the results of the Health Resources Report for the Western Pacific Region concerning the present situation, shortages, and future trends within the world of nursing showed that the ratio of physicians to nurses in Hongkong, Japan, Thailand, Germany, and the United Kingdom was more than 1:4, and that the ratio of physicians to nurses in Finland, Norway, and Canada was over 1:6.<sup>5</sup> Without a doubt, an inadequate supply of nurses has been a long-existing problem in China. The most recognized cause of nursing shortage seems to be nurses leaves the nursing profession.<sup>6-7</sup> Many nurses tend to leave the nursing profession, and this is regarded as a global political concern.<sup>8</sup>

Turnover intention is defined as the possibility that employees will leave a job within a certain period.<sup>9</sup> The first study on turnover used the participant determination model proposed by March and Simon in 1958.<sup>10</sup> Following on from that study, standardized models, for example, the decision-making process model, the employee-withdrawal behavior model, and the intermediate chain extension model, have been constructed, using the peak mutation model, the unfolding model, and the loss motivation model.<sup>11-15</sup> Among these theoretical models and studies, turnover intention has been considered to be one of the best factors to predict turnover behavior, and has shown significant explanatory power.<sup>16</sup> Therefore, turnover intention has been the focus of this study.

1  
2  
3  
4  
5  
6  
7  
8  
9  
10  
11  
12  
13  
14  
15  
16  
17  
18  
19  
20  
21  
22  
23  
24  
25  
26  
27  
28  
29  
30  
31  
32  
33  
34  
35  
36  
37  
38  
39  
40  
41  
42  
43  
44  
45  
46  
47  
48  
49  
50  
51  
52  
53  
54  
55  
56  
57  
58  
59  
60

Workplace violence can be divided into physical violence (including hitting, shooting, kicking, slapping, pushing, biting, pinching, wounding using sharp objects, and sexual assault and rape) and psychological violence (including verbal abuse, threats and sexual harassment).<sup>17</sup> Job satisfaction represents the extent to which personnel's demands and desires are met within the workplace.<sup>18</sup> Burnout is a syndrome involving emotional exhaustion and depersonalization and one where personal accomplishments are reduced, resulting in continuous work stress that has not been effectively handled.<sup>19</sup> Perceived organizational support refers to the overall perception and beliefs of employees about how organizations view their contributions and care about their interests.<sup>20</sup>

In Kim's review, it was reported that the mean score for turnover intention among Korean nurses was between 2.40 and 3.85.<sup>21</sup> About 40% of the registered nurses in a teaching hospital in Malaysia were reported to have a turnover intention, and the results indicated that age, work experience, nursing education, and overall job satisfaction significantly influence an intention to leave.<sup>22</sup> A survey was conducted in 4 general hospitals in Seoul, and the findings showed that factors influencing turnover intention involve the organizational system, depersonalization, the physical environment, work role, and the organizational climate.<sup>23</sup> A review of the research literature revealed that factors related to the work environment were the most important in respect of nurses' turnover intentions.<sup>24</sup> A study has been conducted among nurses in 1,105 general acute care hospitals in Europe and the United States, and showed that the rates of nurse burnout ranged from 10% to 78%, with the job dissatisfaction rate ranging from 11% to 56% and the intention to leave rate ranging from 14% to 49%.<sup>25</sup>

However, turnover intention is usually affected through a variety of factors, for example, work stress,<sup>9</sup> <sup>26</sup> workplace violence,<sup>27</sup> job satisfaction,<sup>28</sup> burnout,<sup>28</sup> perceived organizational support,<sup>29</sup> organizational commitment,<sup>29</sup> among others.

1  
2  
3  
4 Workplace violence is a widely reported phenomenon among nurses in medical settings, and it  
5  
6 influences the turnover intention of nurses.<sup>30</sup> A study indicated that turnover intention was positively  
7  
8 associated with exposure types of violence.<sup>27</sup> McDowell found workplace violence to be significantly  
9  
10 related to burnout ( $r = 0.56, P < 0.01$ ) and turnover intention ( $r = 0.24, P < 0.01$ ) for all direct care  
11  
12 paraprofessionals.<sup>31</sup> The previous results determined that a statistically significant relationship existed  
13  
14 between turnover intention and workplace violence.<sup>32 33</sup> Therefore, workplace violence is one of the  
15  
16 influential factors in turnover intention.<sup>34 35</sup>

17  
18  
19  
20 Job satisfaction has been considered as a major contributory factor to intending to stay in a job,  
21  
22 in previous studies.<sup>24 26 36</sup> In contrast to this viewpoint, previous studies have also shown that job  
23  
24 satisfaction mainly affects turnover intention in respect of organizational commitment.<sup>37 38</sup> Furthermore,  
25  
26 a third view has showed that two considerations, namely having demands and desires met and  
27  
28 organizational commitment, exist simultaneously regarding job satisfaction and turnover intention.<sup>39</sup>

29  
30  
31  
32 Moreover, substantial evidence has indicated that employees with high levels of burnout are  
33  
34 more prone to turnover intention.<sup>33 40</sup> Some studies have reported that perceived organizational support  
35  
36 is a predictor of turnover intention.<sup>37 39 41 42</sup> One study has indicated that perceived organizational  
37  
38 support is negatively associated with turnover intention.<sup>43</sup>

39  
40  
41  
42 In China, a study from Shanghai indicated that 22.5% of nurses expressed their intention to leave  
43  
44 the emergency department within the following year.<sup>44</sup> The mean score for turnover intention of ICU  
45  
46 nurses was between 1.95 and 2.92 in Shandong.<sup>45</sup> A survey of turnover intention among 10 tertiary  
47  
48 hospitals' nurses in Beijing showed that 16.5% of nurses may leave the current work unit in the  
49  
50 following year.<sup>46</sup> An investigation in Tianjin showed that work support had a negative influence on  
51  
52 turnover intention.<sup>47</sup> Previous results reflected a significant correlation between psychological capital,  
53  
54  
55  
56

1  
2  
3 work engagement, and turnover intention among primary nurses.<sup>48</sup> Substantial studies have mainly  
4 investigated the relationship among job stress, job satisfaction, job engagement, organizational support  
5 and turnover intention among Chinese nurses in one province.<sup>6 45-49</sup> Therefore, the researchers selected  
6 nurses from tertiary hospitals in several provinces and further verified the relationship between  
7 workplace violence frequency and turnover intention in this study.

8  
9  
10  
11  
12  
13  
14  
15  
16 Based on the above evidence, researchers proposed the present study with the following  
17 hypotheses: (1) workplace violence, job satisfaction, burnout and organizational support had different  
18 effects on turnover intention; (2) workplace violence had a significant impact on job satisfaction and  
19 burnout; (3) organizational support served as a moderator between workplace violence and turnover  
20 intention; and (4) organizational support served as a moderator between job satisfaction and burnout.

21  
22  
23  
24  
25  
26  
27  
28 The present study aims to examine the relationship between workplace violence, job satisfaction,  
29 burnout, organizational support and turnover intention, and explore factors associated with turnover  
30 intention among nurses in Chinese tertiary hospitals.

## 31 32 33 34 35 **METHODS**

### 36 37 38 **Participants and sampling**

39  
40 A cross-sectional study of nurses was conducted from August 2016 through January 2017 in eastern  
41 (Beijing), central (Heilongjiang, Anhui), and western (Shaanxi) of China. A total of nine public tertiary  
42 hospitals in four provinces (municipalities) were selected using a purposive sampling method. The total  
43 number of nurses in 9 hospitals (the hospitals were similar in size, department setting, and number of  
44 nurses) is about 18,900; a total of 2,067 samples were extracted, with these nurses accounting for  
45 10.9% of the total nurses. On average, 225 nurses from each hospital were extracted (in the actual  
46 sampling process, the sample size of each hospital was slightly different, but it was roughly 225

1  
2  
3 people). All investigators were subject to unified training before starting the investigation and could act  
4  
5  
6 as investigators when qualified. Permission to conduct the study was acquired from the managers, and  
7  
8 the medical dispute resolution and human resources departments of the hospitals concerned. An  
9  
10 anonymous, self-administered questionnaire was used to conduct face-to-face surveys. The Cronbach  
11  
12 alpha of each original scale was as follows: Workplace Violence Scale was 0.873,<sup>50</sup> Chinese Maslach  
13  
14 Burnout Inventory General Survey was 0.864,<sup>51</sup> Minnesota Job Satisfaction Questionnaire Revised  
15  
16 Short Version was 0.891,<sup>52</sup> Perceived Organizational Support-Simplified Version Scale was 0.921,<sup>53</sup>  
17  
18 and Turnover Intention Scale was 0.770.<sup>54</sup> The two public hospitals in Harbin (the Fourth Affiliated  
19  
20 Hospital of Harbin Medical University and the principal hospital of Harbin) were selected as the  
21  
22 locations for our pre-study before the formal investigation (200 questionnaires were distributed and  
23  
24 returned, and these data were excluded in the formal survey data). The investigators and hospital  
25  
26 coordinators distributed and took back the questionnaires immediately from the participants. A total of  
27  
28 2,067 questionnaires were distributed to nurses, all of which were returned. However, 306  
29  
30 questionnaires were missing data or blank, which left 1,761 valid questionnaires (effective response  
31  
32 rate = 85.20%). The following conditions were selected as the inclusion criteria for this study: (1)  
33  
34 having a practicing nurse certificate; (2) having at least one year of clinical nursing experience; (3)  
35  
36 being still engaged in clinical nursing work during the investigation; and (4) voluntary participation  
37  
38 without prejudice to the participants' work. The exclusion criteria for this study were rehire after  
39  
40 retirement nurses, refresher nurses, and nurses who had not passed the probation period.  
41  
42  
43  
44  
45  
46  
47  
48  
49

## 50 **Questionnaire**

### 51 *Demographic characteristics*

52 Demographic information on the nurses was collected, including sex, age, marital status, educational  
53  
54  
55  
56  
57  
58  
59  
60

1  
2  
3 background, professional qualifications, employment role, department, years of experience, and daily  
4  
5 working hours. Age was categorized as  $\leq 30$ , 31–50, and  $\geq 51$  years old. Marital status was categorized  
6  
7 as married and single/divorced/widowed. Educational background was classified as junior college or  
8  
9 below, undergraduate, and master's degree or above. Professional qualifications were categorized as  
10  
11 primary title, intermediate title, and senior title. Department was classified as emergency department,  
12  
13 internal medicine, surgery, obstetrics and gynecology, pediatrics, and other. Work experience was  
14  
15 divided into 4 categories:  $\leq 4$ , 5–10, 11–20, and  $\geq 21$  years. Daily working time was categorized as  $\leq 8$ ,  
16  
17 8–10, 10–12, and  $\geq 12$  hours.  
18  
19  
20  
21  
22

### 23 ***Workplace Violence Scale***

24  
25 The Workplace Violence Scale developed by the International Labour Office, the International Council  
26  
27 of Nurses, the World Health Organization, and Public Services International Joint Program on  
28  
29 Workplace Violence in the Health Sector in 2003 was used to measure workplace violence.<sup>50</sup> The scale  
30  
31 used in this study consists of 2 dimensions (physical violence and psychological violence) and has 9  
32  
33 items that were adopted from these scales. Each item is scored on a 4-point scale reflecting  
34  
35 respondents' frequency of exposure to workplace violence (0 = 0 times, 1 = 1 time, 2 = 2–3 times, and  
36  
37 3 =  $\geq 4$  times). The total possible score ranges from 0 to 27, with a higher total score indicating a  
38  
39 higher frequency of exposure to workplace violence. In the present study, Cronbach's  $\alpha$  for the  
40  
41 Workplace Violence Scale was 0.860.  
42  
43  
44  
45  
46

### 47 ***Burnout***

48  
49 Burnout was assessed using the Chinese Maslach Burnout Inventory General Survey (CMBI-GS) in  
50  
51 the present study, with a total of 15 items, developed by Li YX, and proven to be valid.<sup>51 55-56</sup> The  
52  
53 CMBI-GS is categorized into 3 subscales reflecting job burnout: emotional exhaustion,  
54  
55  
56  
57



1  
2  
3  
4  
5  
6  
7  
8  
9  
10  
11  
12  
13  
14  
15  
16  
17  
18  
19  
20  
21  
22  
23  
24  
25  
26  
27  
28  
29  
30  
31  
32  
33  
34  
35  
36  
37  
38  
39  
40  
41  
42  
43  
44  
45  
46  
47  
48  
49  
50  
51  
52  
53  
54  
55  
56  
57  
58  
59  
60

depersonalization, and reduced personal accomplishment. The response options for each item on the CMBI-GS are rated from 0 (never) to 6 (daily), based on the frequency of occurrence of the specific work feelings of the respondent. The score of the 3 subscales is equal to the average of the sum of items for each of the subscales. The total possible score is calculated through adding the scores for 3 subscales, and it ranges from 0 to 18 points, with a higher score indicating a higher level of burnout. In terms of the average score of all items, a score less than 8.5 points indicates lower job burnout, a score of 8.5–14.2 points indicates that burnout is serious, and burnout is extremely serious when the score is greater than 14.2 points. In this study, Cronbach's  $\alpha$  for the CMBI-GS was 0.873. The internal consistency coefficients were 0.834, 0.826, 0.806, and 0.812, for emotional exhaustion, depersonalization, and reduced personal accomplishment, respectively.

### ***Job satisfaction***

The Minnesota Job Satisfaction Questionnaire Revised Short Version (MJSQ-RSV) was used in this study to assess participants' satisfaction with their job.<sup>52 57</sup> The MJSQ-RSV consists of 20 items, including 12 items measuring intrinsic satisfaction and 8 items measuring extrinsic satisfaction. Each item is rated on a 5-point Likert scale (1 = strongly unsatisfied, 2 = unsatisfied, 3 = uncertain, 4 = satisfied, and 5 = strongly satisfied). Intrinsic satisfaction refers to the degree of satisfaction with the factors involved in the job content. Extrinsic satisfaction refers to the degree of satisfaction of the individual in terms of current job rewards, promotion, and leadership style. The higher the participant's self-rating, the higher their satisfaction with the job. The present study revealed that Cronbach's  $\alpha$  for the MJSQ-RSV was 0.882, and for the two subscales it was 0.872 (intrinsic satisfaction) and 0.896 (extrinsic satisfaction).

### ***Perceived organizational support scale***

1  
2  
3 Perceived organizational support was measured using the Perceived Organizational Support–Simplified  
4  
5  
6 Version Scale (POS–SVS). Previous studies have found the POS–SVS to have high reliability and  
7  
8 validity as a measure of perceived organizational support.<sup>37 42 53</sup> It consists of nine self–report items,  
9  
10  
11 which comprise two reverse questions (even if employees try to do the best job they can, the work unit  
12  
13 doesn't notice it; the work unit rarely cares about employees). The other 7 items mainly indicate that  
14  
15 work unit cares about the well–being and job satisfaction of employees and pays attention to the work  
16  
17 goals and values and employees' opinions; employees can get help when they encounter difficulties;  
18  
19 and the unit will be proud of what employees have achieved. Each item is rated on a 5–point Likert  
20  
21 scale, and ranged from 1 (extremely inconsistent) to 5 (extremely consistent). The total possible score  
22  
23 is calculated through adding the scores for all items, and it ranges from 9 to 45 points, with a higher  
24  
25 score indicating a higher organizational support. In this study, Cronbach's  $\alpha$  for the POS–SVS was  
26  
27  
28  
29  
30 0.890.

### 31 32 33 ***Turnover intention scale***

34  
35 The Turnover Intention Scale, which has been used to measure turnover intention among nurses was  
36  
37 used in the present study. The turnover intention scale was developed by Lee and Lee,<sup>54</sup> and has been  
38  
39 widely used in many studies.<sup>9 46 47</sup> This 6–item scale is divided into 3 dimensions: the possibility of an  
40  
41 employee quitting his/her present job, the motivation for employees to find other jobs, and the  
42  
43 possibility of employees having access to external work. Each item is scored on a 4–point scale  
44  
45 reflecting participants' intention to leave (1 = never, 2 = seldom, 3 = occasionally, and 4 = often). The  
46  
47 total possible score is counted through adding the scores for all items, and it ranges from 6 to 24 points,  
48  
49 with a higher score indicating a stronger intention to leave. The extent of turnover intention is divided  
50  
51 into 4 levels according to the different total average score of turnover intention. A total average score  $\leq$   
52  
53  
54  
55  
56  
57  
58  
59  
60

1  
2  
3  
4 1 indicates that turnover intention is particularly low, less low when it is from 1 to 2, higher when it is  
5  
6 from 2 to 3, and exceptionally high when it is greater than 3. In the present study, Cronbach's  $\alpha$  for the  
7  
8 Turnover Intention Scale was 0.862.  
9

### 10 **Data Analysis**

11  
12 EpiData version 3.1 was used to establish the study's database. Missing data or poor-quality  
13  
14 questionnaires were eliminated. To ensure accuracy, two trained personnel entered the data after all the  
15  
16 surveys were completed. IBM SPSS V.19.0 was used for the data analysis in this study. Descriptive  
17  
18 statistics, including numbers (n), percentages (%), means, and standard deviations (SD) were calculated  
19  
20 for the demographic variables. We used one-way analysis of variance (ANOVA) or independent  
21  
22 sample t-tests to compare group differences concerning the measurements of the continuous variables.  
23  
24 Pearson's correlations were used to examine correlations among the continuous variables. Linear  
25  
26 regression analysis was used to examine the associations of the demographic variables and workplace  
27  
28 violence, job satisfaction, burnout, perceived organizational support, and turnover intention variables.  
29  
30 Statistics, including F values,  $R^2$ ,  $R^2$ -changes ( $\Delta R^2$ ), standardized regression coefficients ( $\beta$ ), and  
31  
32 P-values for each step in the regression model were reported. All study variables were tested for  
33  
34 multicollinearity. A P-value < 0.05 was considered statistically significant.  
35  
36  
37  
38  
39  
40  
41

42 Path analysis was used to examine the relationship among the five variables, including workplace  
43  
44 violence, job satisfaction, burnout, perceived organizational support, and turnover intention. A  
45  
46 structural equation model (SEM) for path analysis was constructed using the AMOS 17.0 program to  
47  
48 analyze the effect of workplace violence on job satisfaction, burnout, perceived organizational support,  
49  
50 and turnover intention. The model was considered to have a good fit when all path coefficients were  
51  
52 significant at the level of 0.05;  $\chi^2/df$ , was below 5; the standardized root mean square residual (SRMR)  
53  
54  
55  
56  
57

was below 0.08; the root mean square error of approximation (RMSEA) was below 0.08; the root mean squarer residual (RMR) was below 0.10; as well as the goodness of fit index (GFI), the normed fit index (NFI), Tucker–Lewis incremental fit (TLI) and comparative fit index (CFI) being  $\geq 0.90$ .

### STROBE Statement

The STROBE (Strengthening the Reporting of Observational Studies in Epidemiology) guidelines are followed in this study.

### Ethical Considerations

Ethical approval to conduct this study was granted by the Research Ethics Committee of Harbin Medical University, and informed consent was obtained from each hospital and the nurses involved in the investigation. All participants gave their informed consent before the survey; they were assured that their personal information would be kept confidential.

## RESULTS

### Demographic Characteristics of the Participants

The demographic characteristics of the respondents are shown in Table 1.

**Table 1. Demographic characteristics of participants (N=1761).**

| Demographic variables     | n    | %    |
|---------------------------|------|------|
| <b>Gender</b>             |      |      |
| Male                      | 60   | 3.4  |
| Female                    | 1701 | 96.6 |
| <b>Age group (years)</b>  |      |      |
| $\leq 30$                 | 899  | 51.1 |
| 31-50                     | 793  | 45.0 |
| $\geq 51$                 | 69   | 3.9  |
| <b>Level of education</b> |      |      |
| Below undergraduate       | 715  | 40.6 |
| Undergraduate             | 1020 | 57.9 |
| Master's degree or above  | 26   | 1.5  |
| <b>Marital status</b>     |      |      |

|                                    |      |      |
|------------------------------------|------|------|
| Married                            | 1128 | 64.1 |
| Single/ divorced/ widowed          | 633  | 35.9 |
| <b>Professional qualifications</b> |      |      |
| Primary title                      | 1161 | 65.9 |
| Intermediate title                 | 528  | 30.0 |
| Senior title                       | 72   | 4.1  |
| <b>Employment role</b>             |      |      |
| Formal employee                    | 693  | 39.4 |
| Temporary employee                 | 1068 | 60.6 |
| <b>Department</b>                  |      |      |
| Emergency Department               | 299  | 17.0 |
| Internal Medicine                  | 559  | 31.7 |
| Surgery                            | 543  | 30.8 |
| Obstetrics and Gynecology          | 93   | 5.3  |
| Pediatrics                         | 101  | 5.7  |
| ENT*                               | 82   | 4.7  |
| Other                              | 84   | 4.8  |
| <b>Years of experience</b>         |      |      |
| ≤4                                 | 529  | 30.0 |
| 5-10                               | 619  | 35.2 |
| 11-20                              | 346  | 19.6 |
| ≥21                                | 267  | 15.2 |
| <b>Daily working hours</b>         |      |      |
| ≤ 8                                | 113  | 6.4  |
| 8-10                               | 1485 | 84.3 |
| 10-12                              | 126  | 7.2  |
| ≥ 12                               | 37   | 2.1  |

\* ENT stand for eyes, nose, throat

### **Prevalence of Workplace Violence in the Preceding 12 Months**

During the previous 12 months, the prevalence of physical violence and psychological violence toward nurses was 9.60% (169/1761) and 59.64% (1111/1761), respectively. In the past year, respondents reported an exposure frequency of workplace violence at less than or equal to 3, accounting for 65.9% of all incidents. The respondents reported that the patients' relatives were the main perpetrators (71.2%, n = 797), followed by the patients (25.4%, n = 284).

### **The Difference Between Participants' Characteristics and the Multiple Variables Score**

Table 2 shows the descriptive association between respondents' characteristics and the burnout, job

1  
2  
3 satisfaction, organizational support, and turnover intention scores. There was a significant difference in  
4  
5  
6 the score of turnover intention among characteristics involving age group, educational level, different  
7  
8 professional titles, employment form, department, years of experience and daily working hours for  
9  
10 nurses in the tertiary hospitals.  
11

### 12 **Pearson correlations between different measurement variables**

13  
14 Table 3 shows the correlations among the respondents' turnover intention and scores on workplace  
15  
16 violence, burnout, job satisfaction, and perceived organizational support. As expected, the level of  
17  
18 turnover intention was positively correlated with respondents' scores on workplace violence ( $r = 0.122$   
19  
20  $P < 0.001$ ). Burnout was positively associated with turnover intention ( $r = 0.444$ ,  $P < 0.001$ ). The level  
21  
22 of turnover intention was negatively correlated with participants' scores on job satisfaction ( $r = -0.367$ ,  
23  
24  $P < 0.001$ ) and perceived organizational support ( $r = -0.379$ ,  $P < 0.001$ ), respectively.  
25  
26  
27  
28

### 29 **Linear Regression Analysis and Path Analysis of Factors Related to Turnover Intention**

30  
31 The predicting factors of turnover intention are presented in Table 4. Demographic variables that were  
32  
33 significantly related to turnover intention were used as control variables. A professional title had a  
34  
35 significant effect on turnover intention in the model (Block 1). As shown in Block 2, workplace  
36  
37 violence was positively associated with turnover intention ( $\beta = 0.035$ ,  $P < 0.001$ ). In Block 3,  
38  
39 emotional exhaustion ( $\beta = 0.054$ ,  $P < 0.001$ ) and depersonalization ( $\beta = 0.054$ ,  $P < 0.001$ ) were  
40  
41 positively associated with turnover intention, whereas extrinsic satisfaction was negatively associated  
42  
43 with turnover intention in the regression model ( $\beta = -0.270$ ,  $P < 0.001$ ). As shown in Block 4,  
44  
45 perceived organizational support was negatively associated with turnover intention ( $\beta = -0.110$ ,  $P <$   
46  
47  $0.001$ ).  
48  
49  
50  
51  
52  
53  
54  
55  
56  
57  
58  
59  
60

**Table 2. Burnout, job satisfaction, perceived organizational support and turnover intention according to general characteristics.**

| Characteristics                    | Burnout     | Job satisfaction | Workplace violence | Perceived organizational support | Turnover intention |
|------------------------------------|-------------|------------------|--------------------|----------------------------------|--------------------|
|                                    | M ± SD      | M ± SD           | M ± SD             | M ± SD                           | M ± SD             |
| <b>Gender</b>                      |             |                  |                    |                                  |                    |
| Male                               | 6.23 ± 3.34 | 3.54 ± 0.55      | 3.15 ± 3.92        | 3.27 ± 0.57                      | 2.30 ± 0.71        |
| Female                             | 6.53 ± 3.08 | 3.52 ± 0.54      | 2.11 ± 2.60        | 3.10 ± 0.64                      | 2.40 ± 0.60        |
| F/t                                | -0.757      | 0.256            | 8.931**            | 1.991*                           | -1.263             |
| <b>Age group (years)</b>           |             |                  |                    |                                  |                    |
| ≤ 30                               | 6.58 ± 3.03 | 3.54 ± 0.54      | 1.81 ± 2.38        | 3.13 ± 0.64                      | 2.44 ± 0.61        |
| 31-50                              | 6.53 ± 3.16 | 3.50 ± 0.55      | 2.36 ± 2.73        | 3.07 ± 0.65                      | 2.39 ± 0.60        |
| ≥ 51                               | 5.80 ± 3.07 | 3.55 ± 0.52      | 3.97 ± 4.09        | 3.14 ± 0.57                      | 2.04 ± 0.56        |
| F/t                                | 2.040       | 1.672            | 26.537**           | 1.986                            | 14.144**           |
| <b>Level of education</b>          |             |                  |                    |                                  |                    |
| Below undergraduate                | 6.62 ± 3.01 | 3.52 ± 0.54      | 1.96 ± 2.45        | 3.11 ± 0.61                      | 2.38 ± 0.63        |
| Undergraduate                      | 6.48 ± 3.13 | 3.53 ± 0.55      | 2.26 ± 2.77        | 3.10 ± 0.65                      | 2.42 ± 0.58        |
| Master's degree or above           | 5.54 ± 3.40 | 3.58 ± 0.54      | 2.58 ± 3.76        | 3.27 ± 0.78                      | 2.08 ± 0.61        |
| F/t                                | 1.737       | 0.202            | 3.161*             | 0.888                            | 4.468*             |
| <b>Marital status</b>              |             |                  |                    |                                  |                    |
| Married                            | 6.45 ± 3.12 | 3.52 ± 0.54      | 2.25 ± 2.69        | 3.10 ± 0.65                      | 2.38 ± 0.60        |
| Single/ divorced/ widowed          | 6.65 ± 3.03 | 3.53 ± 0.56      | 1.96 ± 2.61        | 3.12 ± 0.63                      | 2.43 ± 0.61        |
| F/t                                | -1.304      | -0.203           | 4.789*             | -0.843                           | -1.658             |
| <b>Professional qualifications</b> |             |                  |                    |                                  |                    |
| Primary title                      | 6.67 ± 3.04 | 3.53 ± 0.54      | 1.90 ± 2.38        | 3.11 ± 0.65                      | 2.45 ± 0.60        |
| Intermediate title                 | 6.42 ± 3.17 | 3.49 ± 0.56      | 2.57 ± 3.05        | 3.07 ± 0.62                      | 2.31 ± 0.61        |
| Senior title                       | 4.87 ± 2.77 | 3.70 ± 0.50      | 2.86 ± 3.34        | 3.25 ± 0.68                      | 2.17 ± 0.59        |
| F/t                                | 12.077**    | 4.781**          | 14.412**           | 2.735                            | 15.543**           |

|                            |             |             |             |             |             |
|----------------------------|-------------|-------------|-------------|-------------|-------------|
| <b>Employment role</b>     |             |             |             |             |             |
| Formal employee            | 6.71 ± 3.30 | 3.48 ± 0.57 | 2.46 ± 2.80 | 3.05 ± 0.65 | 2.32 ± 0.60 |
| Temporary employee         | 6.40 ± 2.94 | 3.55 ± 0.52 | 1.93 ± 2.55 | 3.14 ± 0.63 | 2.45 ± 0.61 |
| <b>F/t</b>                 | 2.025*      | -2.460*     | 16.717**    | -2.779**    | -4.377**    |
| <b>Department</b>          |             |             |             |             |             |
| Emergency Department       | 6.51 ± 3.21 | 3.51 ± 0.60 |             | 3.12 ± 0.70 | 2.37 ± 0.63 |
| Internal Medicine          | 6.40 ± 3.06 | 3.55 ± 0.55 | 1.90 ± 2.38 | 3.15 ± 0.64 | 2.38 ± 0.60 |
| Surgery                    | 6.73 ± 3.05 | 3.50 ± 0.54 | 2.00 ± 2.47 | 3.05 ± 0.63 | 2.45 ± 0.59 |
| Obstetrics and Gynecology  | 6.19 ± 2.71 | 3.54 ± 0.50 | 2.65 ± 3.31 | 3.13 ± 0.58 | 2.44 ± 0.56 |
| Pediatrics                 | 7.09 ± 3.23 | 3.47 ± 0.51 | 2.40 ± 2.76 | 3.08 ± 0.64 | 2.35 ± 0.67 |
| ENT                        | 5.87 ± 3.20 | 3.56 ± 0.48 | 1.74 ± 2.31 | 3.12 ± 0.62 | 2.25 ± 0.54 |
| Other                      | 6.36 ± 3.13 | 3.55 ± 0.55 | 2.58 ± 3.29 | 3.11 ± 0.57 | 2.32 ± 0.66 |
| <b>F/t</b>                 | 1.938       | 0.639       | 3.905*      | 1.211       | 2.234*      |
| <b>Years of experience</b> |             |             |             |             |             |
| ≤4                         | 6.26 ± 2.78 | 3.60 ± 0.51 | 1.70 ± 2.56 | 3.21 ± 0.58 | 2.37 ± 0.57 |
| 5-10                       | 6.88 ± 3.18 | 3.49 ± 0.55 | 2.22 ± 2.65 | 3.06 ± 0.67 | 2.49 ± 0.63 |
| 11-20                      | 6.75 ± 3.10 | 3.45 ± 0.58 | 2.28 ± 2.54 | 3.04 ± 0.67 | 2.46 ± 0.59 |
| ≥21                        | 5.94 ± 3.33 | 3.53 ± 0.53 | 2.66 ± 2.92 | 3.08 ± 0.65 | 2.18 ± 0.58 |
| <b>F/t</b>                 | 7.859**     | 6.249**     | 8.745**     | 6.690**     | 18.233**    |
| <b>Daily working hours</b> |             |             |             |             |             |
| ≤ 8                        | 6.08 ± 3.01 | 3.65 ± 0.51 | 2.20 ± 2.96 | 3.25 ± 0.69 | 2.24 ± 0.59 |
| 8-10                       | 6.53 ± 3.09 | 3.52 ± 0.55 | 2.09 ± 2.55 | 3.10 ± 0.64 | 2.41 ± 0.60 |
| 10-12                      | 6.73 ± 2.95 | 3.45 ± 0.49 | 2.06 ± 2.78 | 3.05 ± 0.57 | 2.42 ± 0.64 |
| ≥ 12                       | 7.11 ± 3.71 | 3.49 ± 0.58 | 4.14 ± 4.58 | 3.10 ± 0.62 | 2.37 ± 0.68 |
| <b>F/t</b>                 | 1.415       | 3.096*      | 7.195**     | 2.229       | 2.826*      |

\* P < 0.05, \*\* P < 0.01



1  
2  
3  
4  
5  
6  
7  
8  
9  
10  
11  
12  
13  
14  
15  
16  
17  
18  
19  
20  
21  
22  
23  
24  
25  
26  
27  
28  
29  
30  
31  
32  
33  
34  
35  
36  
37  
38  
39  
40  
41  
42  
43  
44  
45  
46  
47

**Table 3. Pearson correlations among workplace violence, burnout, job satisfaction, perceived organizational support and turnover intention.**

| Variables                                  | 1        | 2        | 3        | 4        | 5        | 6        | 7       | 8       | 9       | 10 |
|--------------------------------------------|----------|----------|----------|----------|----------|----------|---------|---------|---------|----|
| <b>1. Turnover intention</b>               | 1        |          |          |          |          |          |         |         |         |    |
| <b>2. Workplace violence</b>               | 0.122**  | 1        |          |          |          |          |         |         |         |    |
| <b>3. Burnout</b>                          | 0.444**  | 0.206**  | 1        |          |          |          |         |         |         |    |
| <b>4. Emotional exhaustion</b>             | 0.418**  | 0.213**  | 0.792**  | 1        |          |          |         |         |         |    |
| <b>5. Depersonalization</b>                | 0.460**  | 0.220**  | 0.846**  | 0.754**  | 1        |          |         |         |         |    |
| <b>6. Reduced Personal Accomplishment</b>  | 0.102**  | 0.025    | 0.545**  | 0.017    | 0.116**  | 1        |         |         |         |    |
| <b>7. Perceived organizational support</b> | -0.379** | -0.172** | -0.527** | -0.445** | -0.495** | -0.216** | 1       |         |         |    |
| <b>8. Job satisfaction</b>                 | -0.367** | -0.188** | -0.562** | -0.478** | -0.524** | -0.231** | 0.675** | 1       |         |    |
| <b>9. Intrinsic satisfaction</b>           | -0.330** | -0.171** | -0.532** | -0.441** | -0.493** | -0.232*  | 0.626** | 0.946** | 1       |    |
| <b>10. Extrinsic satisfaction</b>          | -0.390** | -0.176** | -0.505** | -0.456** | -0.476** | -0.178** | 0.673** | 0.900** | 0.795** | 1  |

\* P<0.05, \*\* P<0.01

1  
2  
3  
4 Path analysis using the SEM was performed, which is shown in Figure 1. workplace violence had  
5  
6 a negative effect on job satisfaction, which was mediated through perceived organizational support.  
7  
8 The total effect ( $\beta = -0.19$ ) of workplace violence on job satisfaction was comprised of not only its  
9  
10 direct effect ( $\beta = -0.12$ ), but also its indirect effect ( $\beta = -0.07 = -0.13 \times 0.50$ ), mediated through  
11  
12 perceived organizational support. The total effect ( $\beta = 0.53$ ) of workplace violence on turnover  
13  
14 intention comprised its direct effect ( $\beta = 0.36$ ), and its indirect effect ( $\beta = 0.17 = (-0.12) \times 0.19 +$   
15  
16  $(-0.13) \times (-1.05) + 0.25 \times (-0.17) \times (-1.05) + (-0.13) \times 0.50 \times (-0.19)$ ). Job satisfaction was negatively  
17  
18 associated with burnout. On the other hand, job burnout was positively related to turnover intention.  
19  
20 The squared multiple correlations value was 0.432, which implies that the built SEM explained 43.2%  
21  
22 of the total variance of turnover intention.  
23  
24  
25  
26  
27  
28  
29

## 30 DISCUSSION

31  
32  
33 In this cross-sectional hospital-based study of nurses, we evaluated the incidence rate of  
34  
35 workplace violence and the mean score of overall perceptions of turnover intention. The total incidence  
36  
37 rate of workplace violence was 63.6% (1120/1761) during the past year. This finding was close to a  
38  
39 finding from a large sample cross-sectional survey on the prevalence of workplace violence among  
40  
41 Chinese nurses.<sup>17</sup> Moreover, the incidence of Chinese nurses experiencing workplace violence is higher  
42  
43 than that of nurses in other countries.<sup>58-59</sup> This may be due to cultural variations across different  
44  
45 countries in terms of workplace violence perceptions, and the variety of assessment scales used in  
46  
47 different studies. As far as the personal characteristics of nurses are concerned, previous studies have  
48  
49 proved that young age, lack of life and work experience, low professional titles, low education levels  
50  
51 and poor interpersonal relationships are the risk factors for workplace violence against Chinese  
52  
53  
54  
55  
56  
57  
58  
59  
60

**Table 4. Predicting factors of turnover intention.**

| Variables                              | Block 1 ( $\beta$ ) | Block 2 ( $\beta$ ) | Block 3 ( $\beta$ ) | Block 4 ( $\beta$ ) | Block 5 ( $\beta$ ) |
|----------------------------------------|---------------------|---------------------|---------------------|---------------------|---------------------|
| <b>Age group</b>                       | -0.055              | -0.076*             | -0.055              | -0.055              | -0.051              |
| <b>Level of education</b>              | 0.028               | 0.022               | 0.028               | 0.025               | 0.026               |
| <b>Professional qualifications</b>     | 0.120**             | 0.128**             | 0.098**             | 0.095**             | 0.044               |
| <b>Employment role</b>                 | 0.081*              | 0.087*              | 0.108**             | 0.098**             | 0.146**             |
| <b>Department</b>                      | 0.008               | 0.011               | 0.010               | 0.011               | 0.007               |
| <b>Years of experience</b>             | 0.034               | 0.038               | 0.014               | 0.006               | 0.001               |
| <b>Daily working hours</b>             | 0.056               | 0.046               | 0.030               | 0.012               | 0.009               |
| <b>Workplace violence</b>              |                     | 0.034**             | 0.019**             | 0.016**             | 0.005               |
| <b>Organizational support</b>          |                     |                     | -0.039**            | -0.022**            | -0.012**            |
| <b>Intrinsic satisfaction</b>          |                     |                     |                     | 0.001               | 0.008*              |
| <b>Extrinsic satisfaction</b>          |                     |                     |                     | -0.037**            | -0.030**            |
| <b>Emotional exhaustion</b>            |                     |                     |                     |                     | 0.051**             |
| <b>Depersonalization</b>               |                     |                     |                     |                     | 0.113**             |
| <b>Reduced Personal Accomplishment</b> |                     |                     |                     |                     | 0.004               |
| <i>F</i>                               | 6.374**             | 10.553**            | 41.686**            | 41.863**            | 51.582**            |
| <i>R</i> <sup>2</sup>                  | 0.025               | 0.046               | 0.176               | 0.208               | 0.293               |
| $\Delta R^2$                           | 0.025**             | 0.021**             | 0.130**             | 0.032**             | 0.085**             |

\*  $P < 0.05$ , \*\*  $P < 0.01$

nurses.<sup>17</sup> In terms of organizational characteristics, high-risk departments (emergency department, orthopedics department, and pediatrics department), poor organizational climate, lack of team spirit, heavy workload, and shortage of nurses are also frequent factors of occupational violence among nurses. In China, imperfect healthcare laws and regulations, insufficient practice in dealing with medical disputes, and negative reports from the media are also an important inducing factor. Regarding aspect of patients and their relatives, high medical service expectations, long waiting times, high medical costs, unmet requirements, and poor communication between nurses and patients also lead to workplace violence. Therefore, we suggest that the government should supervise the media to ensure the accuracy and authenticity of media coverage. Ward management needs strengthening; for example, surveillance cameras and alarms should be installed in hospital ward corridors, lights should be

1  
2  
3 sufficiently bright in work areas during the night, etc. We further advise hospitals to provide  
4  
5 violence-related training for nurses and provide psychological support, to instruct all staff about the  
6  
7 value of nurses, and to foster nurses' pride in their work and develop an excellent hospital culture.  
8  
9  
10 These measures are conducive to reducing the occurrence of hospital workplace violence.

11  
12  
13 Although different measurement tools for turnover intention were used in different studies, the  
14  
15 average scores and percentages of perceived high turnover intention have been used as a reference for  
16  
17 measuring potential turnover behavior.<sup>60</sup> The total mean score of overall perception of turnover  
18  
19 intention is greater than 2 points, which means that the turnover intention of nurses is high. Based on  
20  
21 this standard, 545 participants had a low turnover intention, but 1216 (69.1%) participants had a high  
22  
23 turnover intention. Meanwhile, a total of 291 of the 1216 nurses (23.9%) with a higher turnover  
24  
25 intention tended to want to leave more strongly (mean score of turnover intention > 3). The Chinese  
26  
27 nurses intending to leave their current profession was higher than in Malaysia,<sup>22</sup> America,<sup>25</sup> Finland,<sup>25</sup>  
28  
29 and Greece.<sup>25</sup> The reason for this phenomenon may be attributed to two aspects. On the one hand,  
30  
31 nursing is a professional, intellectual and practical specialty. With the increase in social demand for  
32  
33 nurses, nurses have certain advantages in obtaining employment. They can more readily find jobs,  
34  
35 which increases the likelihood of nurses leaving their current jobs. On the other hand, the contradiction  
36  
37 between the low social status of nurses and patient expectations is becoming a prominent problem in  
38  
39 China's medical environment, which is leading to a crisis of confidence. It is worth noting that  
40  
41 historical reasons have led to low status and poor professional recognition of Chinese nurses. However,  
42  
43 patients place high demands on the level of health services provided by nurses. This significant contrast  
44  
45 between expectations and reality can easily lead to nurses' resignations. Based on the present study,  
46  
47 more attention need to be paid to nurses in China to reduce their turnover intention.  
48  
49  
50  
51  
52  
53  
54  
55  
56

1  
2  
3  
4 In the univariate analysis, this study found that there were significant differences in self-ratings of  
5  
6 job burnout and job satisfaction among nurses with different professional titles. Furthermore, the  
7  
8 results also indicated that nurses with primary professional titles had higher job burnout and lower job  
9  
10 satisfaction. This finding may be attributed to these nurses often having more direct contact with  
11  
12 patients, a busier work schedule, and work pressure being greater than for nurses with other  
13  
14 professional titles.  
15  
16

17  
18 This study also found that burnout has a negative impact on the job satisfaction of nurses, which is  
19  
20 consistent with previous studies.<sup>26 31</sup> The higher the level of burnout, the lower the job satisfaction of  
21  
22 nurses. This may be related to the particularity of the nurses' profession, which requires nurses to have  
23  
24 a keen sense of responsibility, high professional skills, carefulness and patience, and nurses work in  
25  
26 stressful conditions for prolonged periods. Furthermore, a crisis of trust has emerged in China's  
27  
28 medical environment, so nurses need to spend a lot of emotional labor in dealing with the relationship  
29  
30 between nurses and patients. However, positive feedback is rarely received and patient mistrust often  
31  
32 remains, resulting in a state of emotional exhaustion and reduced personal accomplishment, which then  
33  
34 negatively affects the judgment of nurses concerning their work environment and conditions, reducing  
35  
36 in turn the level of their job satisfaction. The SEM results clearly stated that organizational support  
37  
38 serves as a moderator between job satisfaction and burnout. This means that organizational support  
39  
40 (paying attention to employees' feelings and salary benefits) can relieve nurses' job burnout to some  
41  
42 extent and then improve their satisfaction with various systems and policies of the organization. As a  
43  
44 reward for the organization, employees will also enhance their commitment and loyalty to the  
45  
46 organization and will improve their efforts to work. To improve the job satisfaction of nurses, it is  
47  
48 suggested that hospital managers provide organizational support for nurses from the following three  
49  
50  
51  
52  
53  
54  
55  
56  
57  
58  
59  
60

1  
2  
3 aspects: first, strengthen communication, understand the needs of nurses, and take targeted  
4  
5 organizational support measures so that nurses can really appreciate the hospitals' support; second, pay  
6  
7 attention to the work of nurses, provide necessary work resources and condition support for them, pay  
8  
9 attention to the problems faced by nurses and try their best to provide help to alleviate nurses'  
10  
11 emotional exhaustion and reduce the degree of depersonalization; and finally, pay attention to the  
12  
13 welfare of nurses, implement reasonable salaries and performance incentive system, pay attention to  
14  
15 the interests of nurses in decision-making, and at the same time, pay attention to the professional  
16  
17 development of nurses, and provide more development platforms for nurses so that they can find their  
18  
19 own value and personal accomplishment in the process of career development.  
20  
21  
22  
23  
24

25  
26 Previous studies have mentioned a series of influencing factors regarding turnover intention in  
27  
28 other countries or areas.<sup>22-25</sup> According to linear regression analysis, Block 1 showed that professional  
29  
30 titles and employment roles are two important demographic variables that affect nurses' turnover  
31  
32 intention, which is different from the findings of Almalki *et al.*'s study.<sup>61</sup> The results of single factor  
33  
34 analysis indicated that nurses with lower-level professional titles had a higher turnover intention, and  
35  
36 full-time employed nurses had a lower turnover intention than temporarily employed nurses. This may  
37  
38 be attributed to nurses with low professional titles being generally in first-line clinical work, facing a  
39  
40 heavy workload and finding it difficult to cope with the patients or their relatives. They are confronted  
41  
42 with an imbalance between pay and return, as well as social ignorance of their role, which affects their  
43  
44 work enthusiasm, and thereby increasing the possibility of leaving. In addition, the temporarily  
45  
46 employed nurses' income is unstable and these nurses do not have a strong sense of belonging to the  
47  
48 hospital, so a turnover intention possibility is stronger.  
49  
50  
51  
52  
53

54  
55 In the linear regression analysis, Block 2 showed that workplace violence has a significant effect  
56  
57

1  
2  
3 on turnover intention, which was consistent with earlier findings.<sup>31-35</sup> Based on the SEM, the total  
4 impact of workplace violence on turnover intention was 0.53. Workplace violence is a particularly  
5 shocking event within our model. Workplace violence can provoke in nurses a sense of extreme  
6 insecurity and reduced self-value which may directly lead to turnover intention. SEM also stated  
7 clearly that perceived organizational support played a moderating role in the impact of workplace  
8 violence on turnover intention. Workplace violence not only causes physical and psychological harm to  
9 nurses but also aggravates nurses' stress and reluctance to work,<sup>17</sup> resulting in an increase in turnover  
10 intention. Hospitals can carry out a variety of amateur activities to reduce the work stress of nurses.  
11 The hospital can also set up a psychological decompression room, regularly conduct psychological  
12 counseling for nurses through a psychologist, and conduct emotional management well.<sup>17</sup> In brief, the  
13 more comprehensive the support provided by the organization, the less likely the nurses are to have bad  
14 emotions. Moreover, hospitals can provide diverse emotional support for nurses who have experienced  
15 different types of workplace violence so that they feel the concern of the hospital, reduce the harm to  
16 nurses.

17  
18  
19  
20  
21  
22  
23  
24  
25  
26  
27  
28  
29  
30  
31  
32  
33  
34  
35  
36  
37  
38 At the same time, in the Pearson correlation and linear regression analysis, perceived  
39 organizational support had a negative influence on turnover intention, that is, the higher the sense of  
40 organizational support, the lower the turnover intention. The psychological mechanism embodied in the  
41 perceived organizational support is the social exchange between employees and organizations.<sup>62</sup> From  
42 the view of social exchange, the exchange consciousness of employees concerning perceived  
43 organizational support depends entirely on the level of that organizational support. The fundamental  
44 reason employees are willing to stay in an organization is that they feel the contributions of employees  
45 to the organization are equal or fair in respect of what they receive in return from the relevant  
46  
47  
48  
49  
50  
51  
52  
53  
54  
55  
56  
57  
58  
59  
60

1  
2  
3 organization. After workplace violence has occurred, hospitals need to provide care and support to  
4  
5  
6 nurses as far as possible to reduce the harm of violence inflicted on them, which, in turn, is likely to  
7  
8 increase their emotional commitment to the hospital, and reduce the possibility of leaving. Therefore,  
9  
10 the hospital should provide active support measures, including: giving respect, welfare support, and  
11  
12 practical support; effectively conveying the support of upper management; ensuring a relationship of  
13  
14 trust and support between employees and their immediate supervisors; emphasizing procedural justice  
15  
16 in the organization; and creating a supportive organizational climate.<sup>20</sup> These measures are likely to  
17  
18 encourage nurses to stay in their present position and improve their job satisfaction, thus reducing their  
19  
20 turnover rate.<sup>37 43</sup>

21  
22  
23  
24  
25 Our findings showed that job burnout is positively related to turnover intention, which is similar to  
26  
27 previous results.<sup>23 29 31 40</sup> The results of linear regression analysis also demonstrated that emotional  
28  
29 burnout and depersonalization had a significant influence on turnover intention. At present, there are  
30  
31 various theories and models (for example, the conservation of resources theory,<sup>63</sup> the job  
32  
33 demand-resource model,<sup>64</sup> and the effort-reward imbalance model<sup>65</sup>) which have been used to explain  
34  
35 burnout. One aspect in common arising from these theories involves an employee's experiencing a  
36  
37 sense of inconsistency in relation to what the job promises and what it delivers, which leads to job  
38  
39 burnout. Another noteworthy result of our study was that job satisfaction was found to be negatively  
40  
41 related to turnover intention in the SEM, similar to previous results.<sup>9 11 24 26 66</sup> Therefore, hospitals  
42  
43 should pay greater attention to the working conditions and health status of nurses and increase their job  
44  
45 satisfaction and sense of organizational belonging to reduce their job burnout and turnover intention.  
46  
47  
48  
49  
50

51  
52 A Pearson correlation analysis also showed that workplace violence was positively related to job  
53  
54 burnout. Nurses often face shocking events, for example, workplace violence and organizational  
55  
56



1  
2  
3  
4  
5  
6  
7  
8  
9  
10  
11  
12  
13  
14  
15  
16  
17  
18  
19  
20  
21  
22  
23  
24  
25  
26  
27  
28  
29  
30  
31  
32  
33  
34  
35  
36  
37  
38  
39  
40  
41  
42  
43  
44  
45  
46  
47  
48  
49  
50  
51  
52  
53  
54  
55  
56  
57  
58  
59  
60

injustice, during their work, and negative attitudes, for example patient mistrust, which fosters job burnout, affecting their work enthusiasm and work quality, and increasing the possibility of leaving.

57-59

The present study has several limitations. First, researchers collected data concerning whether nurses had experienced workplace violence in the last 12 months, so there may be recall bias in the results. Second, it was not known whether those returning incomplete questionnaires differed in any significant way from those who completed them. Third, purposive sampling results are greatly influenced due to the preconceptions of researchers. To the extent that subjective judgment may be biased, this can readily lead to sampling bias and cannot provide complete confidence in the results of the overall investigation. Thus, the researchers involved clearly understand the basic characteristics of the population under investigation, so that the selected samples can be representative and typical.

## CONCLUSIONS

In this study, the turnover intention of nurses in tertiary hospitals was found to be close to our expected results. A series of measures, for example, to provide material improvements and psychological /emotional support, to facilitate greater organizational justice, to prevent the occurrence of workplace violence, and to relieve the job burnout of nurses should be undertaken by hospital administrations. The hospital can improve nurses' sense of organizational belonging, reduce the loss of nursing human resources, and foster the job stability of nurses.

## Acknowledgments

The authors thank all the nurses, managers and Chinese Hospital Association for their assistance and support for this project.

### Author Contributions

LF, TS and XN designed the study. WL, LS, ZZ, XL, XJ, and LL collected data. WL, SZ, LS, XD, GL, LL and FL analysed the data. WL, SZ and LS drafted the manuscript. WL, LF, TS and XN revised the manuscript.

### Funding

This study was funded by the National Natural Science Foundation of China (NSFC), grant number 71473063.

**Competing interests** None declared.

**Data sharing statement** No additional data are available.

### REFERENCES

1. Nardi DA, Gyurko CC. The Global Nursing Faculty Shortage: Status and Solutions for Change. *J Nurs Scholarship* 2013;45(3):317-26.
2. Sermeus W, Bruyneel L. Investing in Europe's health workforce of tomorrow: Scope for innovation and collaboration. Summary report of the three Policy Dialogues. European Observatory on Health Systems and Policies. *Effect of Growth Rate of Load on Strain Aging of Soft Soil in Marsh* 2010;1995-2001.
3. Auerbach D, Buerhaus P D. Better late than never: workforce supply implications of later entry into nursing. *Health Affairs* 2007;26(1):178-185.
4. National Health and Family Planning Commission of the People's Republic of China. National nursing development program (2016-2020). [internet] <http://www.nhfpc.gov.cn/yzygj/s3593/>

- 201611/92b2e8f8cc644a899e9d0fd572aefef3. Shtml.
5. Xiaoyan W. Analysis of the situation of nursing human resources in public hospitals. *The World Clinical Medicine* 2016;10(4):247-248.
  6. You LM, Ke YY, Zheng J, *et al.* The development and issues of nursing education in China: a national data analysis. *Nurse Educ Today* 2015;35(2):310-314.
  7. Janiszewski GH. The nursing shortage in the United States of America: an integrative review of the literature. *J Adv Nurs* 2003;43(4):335-350.
  8. Anderson DJ, Chan E, Dresner P, *et al.* Nursing and Midwifery Services Strategic Directions, 2011-2015. *World Health Organization* 2010.
  9. Chao MC, Jou RC, Liao CC, *et al.* Workplace stress, job satisfaction, job performance, and turnover intention of health care workers in rural Taiwan. *Asia Pac J Public Health* 2015; 27:NP1827-NP1836.
  10. March JG, Simon HA. *Organizations*. New York: Wiley, 1958.
  11. Mobley WH, Griffeth RW, Hand HH, *et al.* Review and conceptual analysis of the employee turnover process. *Psychol Bull* 1979;86:493-522.
  12. Bluedorn AC. A unified model of turnover from organizations. *Human Relations* 1982;35:135-53.
  13. Sheridan JE, Abelson MA. Cusp catastrophe model of employee turnover. *Academy of Management Journal* 1983;26:418-36.
  14. Lee TW, Mitchell TR. An alternative approach: the unfolding model of voluntary employee turnover. *Academy of Management Review* 1994;1:51-89.
  15. Price JL. The development of a causal model of voluntary turnover. *Iowa State University Press*:

- Ames 2000.
16. Griffeth RW, Hom PW, Gaertner S. A meta-analysis of antecedents and correlates of employee turnover: update, moderator tests, and research implications for the next millennium. *Journal of Management* 2000;26(3):463-488.
  17. Shi L, Zhang D, Zhou C, *et al.* A cross-sectional study on the prevalence and associated risk factors for workplace violence against Chinese nurses. *BMJ open* 2017;7(6):e013105.
  18. Utriainen K, Kyngäs H. Hospital nurses' job satisfaction: a literature review. *J Nurs Manag* 2009;17:1002-1010.
  19. Maslach C, Jackson SE. The measurement of experienced burnout. *Journal of Organizational Behavior* 1981;2(2):99-113.
  20. Rhoades L, Eisenberger R. Perceived organizational support: A review of the literature. *Journal of Applied Psychology* 2002;87(4):698-714.
  21. Kim JK, Kim MJ. A Review of Research on Hospital Nurses' Turnover Intention. *Journal of Korean Academy of Nursing Administration* 2011;17(4):538.
  22. Ramoo V, Abdullah KL, Piaw CY. The relationship between job satisfaction and intention to leave current employment among registered nurses in a teaching hospital. *J Clin Nurs* 2013; 22(21-22):3141-3152.
  23. Yoon GS, Kim SY. Influences of Job Stress and Burnout on Turnover Intention of Nurses. *J Korean Acad Nurs Admin* 2010;16(4):507-516.
  24. Coomber B, Barriball KL. Impact of job satisfaction components on intent to leave and turnover for hospital-based nurses:A review of the research literature. *Int J Nurs Stud* 2007;44(2):297-314.
  25. Aiken LH, Sermeus W, Van den Heede K, *et al.* Patient safety, satisfaction, and quality of

- 1  
2  
3 hospital care: cross sectional surveys of nurses and patients in 12 countries in Europe and the  
4  
5  
6 United States. *BMJ* 2012;344:e1717.  
7
- 8 26. Li L, Hu H, Zhou H, *et al.* Work stress, work motivation and their effects on job satisfaction in  
9  
10 community health workers: a cross-sectional survey in China. *BMJ Open* 2014;4(6):e004897.  
11  
12
- 13 27. Choi SH, Lee H. Workplace violence against nurses in Korea and its impact on professional  
14  
15 quality of life and turnover intention. *J Nurs Manage* 2017;1-11.  
16  
17
- 18 28. Labrague LJ, Mcentro cc Etitte DM, Gloe D, *et al.* Organizational politics, nurses' stress, burnout  
19  
20 levels, turnover intention and job satisfaction. *Int Nurs Rev* 2017;64(1):109.  
21  
22
- 23 29. Oyeleye O, Hanson P, O'Connor N, *et al.* Relationship of workplace incivility, stress, and  
24  
25 burnout on nurses' turnover intentions and psychological empowerment. *J Nurs Admin* 2013;  
26  
27 43(10):536-542.  
28  
29
- 30 30. Seo, Min S, Kim, *et al.* Effect of Workplace Bullying, Job Satisfaction and Self-Esteem on  
31  
32 Turnover Intention in Clinical Nurses. *Journal of the Korean Society for Wellness*  
33  
34 2017;12(2):105-115.  
35  
36
- 37 31. Mcdowell SS. Client-Inflicted Workplace Violence, Burnout, Job Satisfaction, and Turnover  
38  
39 Intention: A Comparative Analysis Between Institution-Based and Home-Based Direct Care  
40  
41 Paraprofessionals. *Dissertations & Theses - Gradworks* 2015;208.  
42  
43  
44
- 45 32. Olsen E, Bjaalid G, Mikkelsen A. Work climate and the mediating role of workplace bullying  
46  
47 related to job performance, job satisfaction, and work ability: A study among hospital nurses. *J*  
48  
49 *Adv Nurs* 2017.  
50  
51
- 52 33. Tarja H, Anne K, Marianna V, *et al.* The prospective effects of workplace violence on physicians'  
53  
54 job satisfaction and turnover intentions: the buffering effect of job control. *BMC Health Serv*  
55  
56

- 1  
2  
3  
4  
5  
6  
7  
8  
9  
10  
11  
12  
13  
14  
15  
16  
17  
18  
19  
20  
21  
22  
23  
24  
25  
26  
27  
28  
29  
30  
31  
32  
33  
34  
35  
36  
37  
38  
39  
40  
41  
42  
43  
44  
45  
46  
47  
48  
49  
50  
51  
52  
53  
54  
55  
56  
57  
58  
59  
60
- Res* 2014;14(1):1-8.
34. Christensen MP. Relationships between workplace violence, burnout, and intent to leave in emergency department nurses. *Dissertations & Theses-Gradworks* 2014;21(21):984-90.
35. Kim JI, Kim TS. Violence episodes and turnover among clinical nurses. *Journal of Korean Academy of Nursing Administration* 2004;10(4):427-436.
36. Tnay E, Othman AEA, Siong HC, *et al*. The Influences of Job Satisfaction and Organizational Commitment on Turnover Intention. *Procedia Social and Behavioral Sciences* 2013;97(2):201-208.
37. Islam T, Latif I, Ali G. The relationship between perceived organizational support and turnover intention: mediating role of affective commitment and job satisfaction. *Research Journal of Applied Sciences Engineering & Technology* 2014;8(24):2422-2425.
38. Samad S, Yasmin S, Yusuf M. The Role of Organizational Commitment in Mediating the Relationship between Job Satisfaction and Turnover Intention. *European Journal of Social Sciences* 2012;30(2):135-137.
39. Yücel I. Examining the Relationships among Job Satisfaction, Organizational Commitment, and Turnover Intention: An Empirical Study. *International Journal of Business & Management* 2012;7(20):1-15.
40. Shimizu T, Feng Q, Nagata S. Relationship between turnover and burnout among Japanese hospital nurses. *J Occup Health* 2005;47(4):334.
41. Abou Hashish E A. Relationship between ethical work climate and nurses' perception of organizational support, commitment, job satisfaction and turnover intent. *Nurs Ethics* 2015;1-16.

- 1  
2  
3  
4 42. Dawley D, Houghton JD, Bucklew NS. Perceived organizational support and turnover intention:  
5  
6 the mediating effects of personal sacrifice and job fit. *Journal of Social Psychology* 2010;150(3):  
7  
8 238-257.  
9  
10  
11 43. Tumwesigye G. The relationship between perceived organizational support and turnover  
12  
13 intentions in a developing country: The mediating role of organizational commitment. *African*  
14  
15 *Journal of Business Management* 2010;4(6):942-952.  
16  
17  
18 44. Zhang Y, Wu J, Fang Z, *et al.* Newly graduated nurses' intention to leave in their first year of  
19  
20 practice in Shanghai: A longitudinal study. *Nurs Outlook* 2017;65(2):202-209.  
21  
22  
23 45. Sun FF, Xu CP. Job stress and its relationship with quality of life and turnover intention of ICU  
24  
25 nurses in general hospital. *Shandong University* 2016.  
26  
27  
28 46. Lei W, Hong S, Xin G, *et al.* Correlation research between nurses' status of career planning and  
29  
30 job satisfaction, turnover intention. *Chin J Mod Nurs* 2015;21(31):3721-3723.  
31  
32  
33 47. Zhang HF, Liu YH, Yang Y, *et al.* The influencing factors of nurses' turnover tendency. *Chinese*  
34  
35 *Journal of Nursing* 2015;50(2):155-160.  
36  
37  
38 48. Hongmei YI, Lanxian YU, Tang J, *et al.* Relationship between psychological capital, work  
39  
40 engagement and turnover intention among primary nurses in Traditional Chinese Medicine  
41  
42 hospitals. *Chinese Nursing Management* 2015.  
43  
44  
45 49. Li L, Ai H, Gao L, *et al.* Moderating effects of coping on work stress and job performance for  
46  
47 nurses in tertiary hospitals: a cross-sectional survey in China. *BMC Health Serv Res* 2017;  
48  
49 17(1):401.  
50  
51  
52 50. ILO/ICN/WHO/PSI. Framework Guidelines for Addressing Workplace Violence in the Health  
53  
54 Sector. Geneva: ILO/ICN/WHO/PSI Joint Programme on Workplace Violence in the Health  
55  
56

- Sector; 2002.
51. Richardsen AM, Martinussen M. Factorial validity and consistency of the MBI-GS across occupational groups in Norway. *International Journal of Stress Management* 2005; 12(3):289-297.
52. Lin Y, Jing-Xiang MA, Chen WQ, *et al.* Relationship between Perception of Job Characteristics and Job Satisfaction of Pediatric Nurses. *Journal of Nursing* 2013.
53. Chen ZX, Aryee S, Lee C. Test of a mediation model of perceived organizational support. *Journal of Vocational Behavior* 2005;66(3):457-470.
54. Lee G, Lee D. A study on the relationships among role conflict, organizational commitment and intent to quit matrix organizational structure: using employees from industrial technology research institute as example. *Graduate School of management, National Chiao Tung University* 2000.
55. Li YX, Zhang K, Zhao GX. Confirmatory factor analysis of job burnout. *Psychological Exploration (in China)* 2005;4:70-74.
56. Li CP, Shi K. The influence of distributive justice and procedural justice on Job Burnout. *Acta Psychologica Sinica* 2003;35(5):677-684.
57. Hirschfeld RR. Does Revising the Intrinsic and Extrinsic Subscales of the Minnesota Satisfaction Questionnaire Short Form Make a Difference? *Educational & Psychological Measurement* 2000;60(60):255-270.
58. Tiruneh BT, Biftu BB, Tumebo AA, *et al.* Prevalence of workplace violence in Northwest Ethiopia: a multivariate analysis. *BMC Nurs* 2016;15:1-6.
59. Franz S, Zeh A, Schablon A, *et al.* Aggression and violence against health care workers in



- 1  
2  
3  
4 Germany-a cross sectional retrospective survey. *BMC Health Serv Res* 2010;10:51.  
5  
6 60. Gu St, Huang QM, Chen ZHQ, *et al*. Relationship between job satisfaction and turnover  
7  
8 intention among physicians from three grade hospitals. *Chinese Journal of Hospital*  
9  
10  
11 *Administration* 2006;9:586-589.  
12  
13 61. Almalki MJ, Gerry FG, Michele C. The relationship between quality of work life and turnover  
14  
15 intention of primary health care nurses in Saudi Arabia. *BMC Health Serv Res* 2012;12(1):314.  
16  
17 62. Settoon RP, Bennett N, Liden RC. Social exchange in organizations: Perceived organizational  
18  
19 support, leader-member exchange, and employee reciprocity. *Social Science Electronic*  
20  
21 *Publishing* 2014;81(3):219-227.  
22  
23  
24  
25 63. Hobfoll SE. The influence of culture, community, and the nested-self in the stress process:  
26  
27 Advancing Conservation of Resources theory. *Applied Psychology* 2001; 50(3):337-421.  
28  
29  
30 64. Yom YH. Analysis of burnout and job satisfaction among nurses based on the Job  
31  
32 Demand-Resource Model. *J Koren Acad Nurs* 2013;43(1):114-122.  
33  
34  
35 65. Siegrist J, Starke D, Chandola T, *et al*. The measurement of effort-reward imbalance at work:  
36  
37 European comparisons. *Soc Sci Med* 2004;58(8):1483-1499.  
38  
39  
40 66. Lu Y, Hu XM, Huang XL, *et al*. The relationship between job satisfaction, work stress, work-family  
41  
42 conflict, and turnover intention among physicians in Guangdong, China: a cross-sectional study.  
43  
44  
45 *BMJ Open* 2017;7(5):e014894.  
46  
47

48 **FIGURE LEGEND: Figure 1. The final model in this study. (CFI = 0.956, GFI = 0.924, IFI =**  
49 **0.942, NFI=0.931, RMR = 0,050, RMSEA = 0.053, TLI = 0.926)**

50  
51  
52 Note: CFI, comparative fit index; GFI, goodness of fit index; IFI, incremental fit index; NFI, normed  
53  
54 fit index; RMR, root mean square residual; RMSEA, root mean square error of approximation; TLI,  
55  
56 Tucker–Lewis incremental fit.

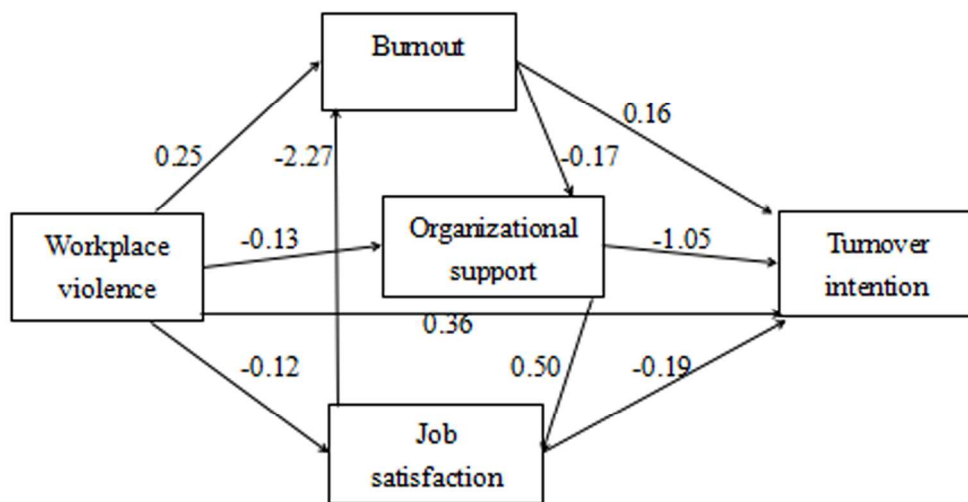

Figure 1. The final model in this study. (CFI = 0.956, GFI = 0.924, IFI = 0.942, NFI=0.931, RMR = 0,050, RMSEA = 0.053, TLI = 0.926)

Note: CFI, comparative fit index; GFI, goodness of fit index; IFI, incremental fit index; NFI, normed fit index; RMR, root mean square residual; RMSEA, root mean square error of approximation; TLI, Tucker-Lewis incremental fit.

117x61mm (300 x 300 DPI)

STROBE 2007 (v4) Statement—Checklist of items that should be included in reports of *cross-sectional studies*

| Section/Topic                | Item # | Recommendation                                                                                                                                                                       | Reported on page #          |
|------------------------------|--------|--------------------------------------------------------------------------------------------------------------------------------------------------------------------------------------|-----------------------------|
| Title and abstract           | 1      | (a) Indicate the study's design with a commonly used term in the title or the abstract                                                                                               | Page 3, line 4-9            |
|                              |        | (b) Provide in the abstract an informative and balanced summary of what was done and what was found                                                                                  | p.4, line 4-18              |
| <b>Introduction</b>          |        |                                                                                                                                                                                      |                             |
| Background/rationale         | 2      | Explain the scientific background and rationale for the investigation being reported                                                                                                 | P. 5; p. 6; p. 7, line 4-49 |
| Objectives                   | 3      | State specific objectives, including any prespecified hypotheses                                                                                                                     | P. 8, line15-33             |
| <b>Methods</b>               |        |                                                                                                                                                                                      |                             |
| Study design                 | 4      | Present key elements of study design early in the paper                                                                                                                              | P. 8, line38-55;            |
| Setting                      | 5      | Describe the setting, locations, and relevant dates, including periods of recruitment, exposure, follow-up, and data collection                                                      | P. 9, line 21-48            |
| Participants                 | 6      | (a) Give the eligibility criteria, and the sources and methods of selection of participants                                                                                          | p.8, 40-56                  |
| Variables                    | 7      | Clearly define all outcomes, exposures, predictors, potential confounders, and effect modifiers. Give diagnostic criteria, if applicable                                             | P. 10, line 4-21            |
| Data sources/<br>measurement | 8*     | For each variable of interest, give sources of data and details of methods of assessment (measurement). Describe comparability of assessment methods if there is more than one group | P. 10; p.11; p.12           |

|                        |     |                                                                                                                                                                                                   |                                      |
|------------------------|-----|---------------------------------------------------------------------------------------------------------------------------------------------------------------------------------------------------|--------------------------------------|
| Bias                   | 9   | Describe any efforts to address potential sources of bias                                                                                                                                         | P.13, line13-18                      |
| Study size             | 10  | Explain how the study size was arrived at                                                                                                                                                         | P. 9, line 48-56                     |
| Quantitative variables | 11  | Explain how quantitative variables were handled in the analyses. If applicable, describe which groupings were chosen and why                                                                      | p. 13, line24-26                     |
| Statistical methods    | 12  | (a) Describe all statistical methods, including those used to control for confounding                                                                                                             | P. 13, line13-55                     |
|                        |     | (b) Describe any methods used to examine subgroups and interactions                                                                                                                               | P. 13, line 16-19                    |
|                        |     | (c) Explain how missing data were addressed                                                                                                                                                       | P. 13, line 19-35                    |
|                        |     | (d) If applicable, describe analytical methods taking account of sampling strategy                                                                                                                | P. 13, line 4-16                     |
|                        |     | (e) Describe any sensitivity analyses                                                                                                                                                             | P. 13, line 36-40                    |
| <b>Results</b>         |     |                                                                                                                                                                                                   |                                      |
| Participants           | 13* | (a) Report numbers of individuals at each stage of study—eg numbers potentially eligible, examined for eligibility, confirmed eligible, included in the study, completing follow-up, and analysed | P. 9,line 22-48;                     |
|                        |     | (b) Give reasons for non-participation at each stage                                                                                                                                              | P. 9, line 39-48                     |
|                        |     | (c) Consider use of a flow diagram                                                                                                                                                                | No                                   |
| Descriptive data       | 14* | (a) Give characteristics of study participants (eg demographic, clinical, social) and information on exposures and potential confounders                                                          | P. 14,line 37-57;<br>P. 15,line 2-36 |
|                        |     | (b) Indicate number of participants with missing data for each variable of interest                                                                                                               | P.9, line 36                         |
| Outcome data           | 15* | Report numbers of outcome events or summary measures                                                                                                                                              | P. 15; P. 16; P. 17;<br>P. 18;P. 19  |

|    |                          |    |                                                                                                                                                                                                              |
|----|--------------------------|----|--------------------------------------------------------------------------------------------------------------------------------------------------------------------------------------------------------------|
| 1  |                          |    |                                                                                                                                                                                                              |
| 2  |                          |    |                                                                                                                                                                                                              |
| 3  |                          |    |                                                                                                                                                                                                              |
| 4  | Main results             | 16 | (a) Give unadjusted estimates and, if applicable, confounder-adjusted estimates and their precision (eg, 95% confidence interval). Make clear which confounders were adjusted for and why they were included |
| 5  |                          |    |                                                                                                                                                                                                              |
| 6  |                          |    |                                                                                                                                                                                                              |
| 7  |                          |    |                                                                                                                                                                                                              |
| 8  |                          |    | (b) Report category boundaries when continuous variables were categorized                                                                                                                                    |
| 9  |                          |    |                                                                                                                                                                                                              |
| 10 |                          |    | (c) If relevant, consider translating estimates of relative risk into absolute risk for a meaningful time period                                                                                             |
| 11 |                          |    |                                                                                                                                                                                                              |
| 12 | Other analyses           | 17 | Report other analyses done—eg analyses of subgroups and interactions, and sensitivity analyses                                                                                                               |
| 13 |                          |    |                                                                                                                                                                                                              |
| 14 |                          |    |                                                                                                                                                                                                              |
| 15 |                          |    |                                                                                                                                                                                                              |
| 16 | <b>Discussion</b>        |    |                                                                                                                                                                                                              |
| 17 |                          |    |                                                                                                                                                                                                              |
| 18 | Key results              | 18 | Summarise key results with reference to study objectives                                                                                                                                                     |
| 19 |                          |    |                                                                                                                                                                                                              |
| 20 |                          |    |                                                                                                                                                                                                              |
| 21 |                          |    |                                                                                                                                                                                                              |
| 22 | Limitations              | 19 | Discuss limitations of the study, taking into account sources of potential bias or imprecision. Discuss both direction and magnitude of any potential bias                                                   |
| 23 |                          |    |                                                                                                                                                                                                              |
| 24 |                          |    |                                                                                                                                                                                                              |
| 25 | Interpretation           | 20 | Give a cautious overall interpretation of results considering objectives, limitations, multiplicity of analyses, results from similar studies, and other relevant evidence                                   |
| 26 |                          |    |                                                                                                                                                                                                              |
| 27 |                          |    |                                                                                                                                                                                                              |
| 28 |                          |    |                                                                                                                                                                                                              |
| 29 |                          |    |                                                                                                                                                                                                              |
| 30 | Generalisability         | 21 | Discuss the generalisability (external validity) of the study results                                                                                                                                        |
| 31 |                          |    |                                                                                                                                                                                                              |
| 32 |                          |    |                                                                                                                                                                                                              |
| 33 |                          |    |                                                                                                                                                                                                              |
| 34 | <b>Other information</b> |    |                                                                                                                                                                                                              |
| 35 |                          |    |                                                                                                                                                                                                              |
| 36 | Funding                  | 22 | Give the source of funding and the role of the funders for the present study and, if applicable, for the original study on which the present article is based                                                |
| 37 |                          |    |                                                                                                                                                                                                              |
| 38 |                          |    |                                                                                                                                                                                                              |
| 39 |                          |    |                                                                                                                                                                                                              |
| 40 |                          |    |                                                                                                                                                                                                              |
| 41 |                          |    |                                                                                                                                                                                                              |
| 42 |                          |    |                                                                                                                                                                                                              |
| 43 |                          |    |                                                                                                                                                                                                              |
| 44 |                          |    |                                                                                                                                                                                                              |
| 45 |                          |    |                                                                                                                                                                                                              |
| 46 |                          |    |                                                                                                                                                                                                              |
| 47 |                          |    |                                                                                                                                                                                                              |

1  
2  
3  
4 \*Give information separately for cases and controls in case-control studies and, if applicable, for exposed and unexposed groups in cohort and cross-sectional studies.  
5  
6  
7

8 **Note:** An Explanation and Elaboration article discusses each checklist item and gives methodological background and published examples of transparent reporting. The STROBE  
9 checklist is best used in conjunction with this article (freely available on the Web sites of PLoS Medicine at <http://www.plosmedicine.org/>, Annals of Internal Medicine at  
10 <http://www.annals.org/>, and Epidemiology at <http://www.epidem.com/>). Information on the STROBE Initiative is available at [www.strobe-statement.org](http://www.strobe-statement.org).  
11  
12  
13  
14  
15  
16  
17  
18  
19  
20  
21  
22  
23  
24  
25  
26  
27  
28  
29  
30  
31  
32  
33  
34  
35  
36  
37  
38  
39  
40  
41  
42  
43  
44  
45  
46  
47

For peer review only

# BMJ Open

## Workplace violence, job satisfaction, burnout, perceived organizational support and their effects on turnover intention among Chinese nurses in tertiary hospitals: a cross-sectional study

|                                 |                                                                                                                                                                                                                                                                                                                                                                                                                                                                                                                                                                                                                                                                                                                                                                                                                                                                                                                                                                                                                                                                                                                                                                                                                                                                                                                                                                                                                                                 |
|---------------------------------|-------------------------------------------------------------------------------------------------------------------------------------------------------------------------------------------------------------------------------------------------------------------------------------------------------------------------------------------------------------------------------------------------------------------------------------------------------------------------------------------------------------------------------------------------------------------------------------------------------------------------------------------------------------------------------------------------------------------------------------------------------------------------------------------------------------------------------------------------------------------------------------------------------------------------------------------------------------------------------------------------------------------------------------------------------------------------------------------------------------------------------------------------------------------------------------------------------------------------------------------------------------------------------------------------------------------------------------------------------------------------------------------------------------------------------------------------|
| Journal:                        | <i>BMJ Open</i>                                                                                                                                                                                                                                                                                                                                                                                                                                                                                                                                                                                                                                                                                                                                                                                                                                                                                                                                                                                                                                                                                                                                                                                                                                                                                                                                                                                                                                 |
| Manuscript ID                   | bmjopen-2017-019525.R2                                                                                                                                                                                                                                                                                                                                                                                                                                                                                                                                                                                                                                                                                                                                                                                                                                                                                                                                                                                                                                                                                                                                                                                                                                                                                                                                                                                                                          |
| Article Type:                   | Research                                                                                                                                                                                                                                                                                                                                                                                                                                                                                                                                                                                                                                                                                                                                                                                                                                                                                                                                                                                                                                                                                                                                                                                                                                                                                                                                                                                                                                        |
| Date Submitted by the Author:   | 05-Feb-2018                                                                                                                                                                                                                                                                                                                                                                                                                                                                                                                                                                                                                                                                                                                                                                                                                                                                                                                                                                                                                                                                                                                                                                                                                                                                                                                                                                                                                                     |
| Complete List of Authors:       | Liu, Wenhui; Harbin Medical University School of Public Health, Department of Health Management<br>Zhao, Shihong; The Second Affiliated Hospital of Harbin Medical University, Department of Neurosurgery<br>Shi, Lei; School of Public Health, Harbin Medical University, Department of Health Management<br>Zhang, Zhong; School of Public Health, Harbin Medical University, Department of Medical Education<br>Liu, Xinyan; Harbin Medical University, Department of Medical Education, School of Public Health<br>Li, Li; School of Public Health, Harbin Medical University, Department of Health Management<br>Duan, Xiaojian; School of Public Health, Harbin Medical University, Department of Health Management<br>Li, Guoqiang; Harbin Medical University, Department of Health Management, School of Public Health<br>Lou, Fengge; School of Public Health, Qiqihar Medical University, Department of Public Health Research<br>Jia, Xiaoli; Chinese Hospital Association, Department of Autonomous Protection<br>Fan, Lihua; Harbin Medical University, Department of Health Management, School of Public Health; School of Public Health, Harbin Medical University, Department of Medical Education<br>Sun, Tao; Harbin Medical University School of Public Health,<br>Ni, Xin; National Center for Children's Health, Beijing Children's Hospital affiliated to Capital Medical University, Department of the Hospital Director |
| <b>Primary Subject Heading</b>: | Health policy                                                                                                                                                                                                                                                                                                                                                                                                                                                                                                                                                                                                                                                                                                                                                                                                                                                                                                                                                                                                                                                                                                                                                                                                                                                                                                                                                                                                                                   |
| Secondary Subject Heading:      | Health policy, Health services research, Nursing, Medical management                                                                                                                                                                                                                                                                                                                                                                                                                                                                                                                                                                                                                                                                                                                                                                                                                                                                                                                                                                                                                                                                                                                                                                                                                                                                                                                                                                            |
| Keywords:                       | Workplace violence, job satisfaction, burnout, organizational support, turnover intention, nurses                                                                                                                                                                                                                                                                                                                                                                                                                                                                                                                                                                                                                                                                                                                                                                                                                                                                                                                                                                                                                                                                                                                                                                                                                                                                                                                                               |
|                                 |                                                                                                                                                                                                                                                                                                                                                                                                                                                                                                                                                                                                                                                                                                                                                                                                                                                                                                                                                                                                                                                                                                                                                                                                                                                                                                                                                                                                                                                 |

1  
2  
3  
4  
5  
6  
7  
8  
9  
10  
11  
12  
13  
14  
15  
16  
17  
18  
19  
20  
21  
22  
23  
24  
25  
26  
27  
28  
29  
30  
31  
32  
33  
34  
35  
36  
37  
38  
39  
40  
41  
42  
43  
44  
45  
46  
47  
48  
49  
50  
51  
52  
53  
54  
55  
56  
57  
58  
59  
60

SCHOLARONE™  
Manuscripts

For peer review only



1  
2  
3  
4 **Workplace violence, job satisfaction, burnout, perceived organizational support and**  
5  
6 **their effects on turnover intention among Chinese nurses in tertiary hospitals: a**  
7  
8 **cross-sectional study**  
9

10  
11  
12  
13 Wenhui Liu,<sup>1\*</sup> Shihong Zhao,<sup>1,2\*</sup> Lei Shi,<sup>1\*</sup> Zhong Zhang,<sup>3</sup> Xinyan Liu,<sup>3</sup> Li Li,<sup>1</sup> Xiaojian Duan,<sup>1</sup>

14  
15  
16 Guoqiang Li,<sup>1</sup> Fengge Lou,<sup>4</sup> Xiaoli Jia,<sup>5</sup> Lihua Fan,<sup>1,3</sup> Tao Sun,<sup>1,3</sup> Xin Ni<sup>6</sup>

17  
18  
19  
20 \*WL, SZ and LS contributed equally to this work.

21  
22  
23 **Correspondence to:** Lihua Fan, School of Public Health, Harbin Medical University, No.157 Baojian  
24 Road, Nangang District, Harbin 150081, China; E-mail: [lihuafan@126.com](mailto:lihuafan@126.com); Tao Sun, School of Public  
25 Health, Harbin Medical University, No.157 Baojian Road, Nangang District, Harbin 150081, China;  
26 E-mail: [hydsuntao@126.com](mailto:hydsuntao@126.com); Xin Ni, No.56 Nanlishi Road, Xicheng District, Beijing 100045, China;  
27 E-mail: [nixin@bch.com.cn](mailto:nixin@bch.com.cn)  
28  
29  
30  
31  
32  
33

34 <sup>1</sup> Department of Health Management, School of Public Health, Harbin Medical University, Harbin,  
35 Heilongjiang, China

36  
37  
38 <sup>2</sup> Department of Neurosurgery, The Second Affiliated Hospital of Harbin Medical University, Harbin,  
39 Heilongjiang, China

40  
41  
42 <sup>3</sup> Department of Medical Education, School of Public Health, Harbin Medical University, Harbin,  
43 Heilongjiang, China

44  
45  
46 <sup>4</sup> Department of Public Health Research, School of Public Health, Qiqihar Medical University, Qiqihar,  
47 Heilongjiang, China

48  
49 <sup>5</sup> Department of Autonomous Protection, Chinese Hospital Association, Beijing, China

50  
51  
52 <sup>6</sup> Department of the Hospital Director, National Center for Children's Health, Beijing Children's Hospital  
53 affiliated to Capital Medical University, Beijing, China

**Abstract****Objective**

Our aim was to assess the relationship between workplace violence, job satisfaction, burnout, organizational support, and turnover intention, and explore factors associated with turnover intention among nurses in Chinese tertiary hospitals.

**Methods**

The purposive sampling method was used to collect data from August 2016 through January 2017. A total of 1761 nurses from 9 public tertiary hospitals in 4 provinces (municipalities) located in eastern (Beijing), central (Heilongjiang, Anhui), and western (Shaanxi) of China completed the questionnaires (effective response rate = 85.20%). A cross-sectional study was conducted using the Workplace Violence Scale, Chinese Maslach Burnout Inventory General Survey, Minnesota Job Satisfaction Questionnaire Revised Short Version, Perceived Organizational Support–Simplified Version Scale, and Turnover Intention Scale.

**Results**

A total of 1216 of 1706 (69.1%) participants had high turnover intention. During the previous 12 months, the prevalence of physical violence and psychological violence toward nurses was 9.60% and 59.64%, respectively. As expected, the level of turnover intention was negatively correlated with participants' scores on job satisfaction ( $r = -0.367$ ,  $P < 0.001$ ) and perceived organizational support ( $r = -0.379$ ,  $P < 0.001$ ), respectively. Burnout was positively associated with turnover intention ( $r = 0.444$ ,  $P < 0.001$ ). Workplace violence was positively associated with turnover intention ( $\beta = 0.035$ ,  $P < 0.001$ ) in linear regression analysis. The total effect ( $\beta = 0.53$ ) of workplace violence on turnover intention comprised its direct effect ( $\beta = 0.36$ ), and its indirect effect ( $\beta = 0.17$ ).

## Conclusions

Perceived organizational support served as a moderator between workplace violence, job satisfaction, burnout, and turnover intention, and it had a significant negative impact on turnover intention. Therefore, nursing managers should understand the importance of the organization's support and establish a reasonable incentive system to decrease turnover intention.

## Strengths and limitations of this study

- A variety of statistical methods (descriptive analysis, Pearson correlation analysis, linear regression analysis, and structural equation model) were employed to investigate the relationship between independent variables and turnover intention.
- The benefits of using the both linear regression and structural equation model are the ability to understand the relationship between variables more clearly and intuitively and to better master the role of organizational support in the relationship between other variables and turnover intention.
- The retrospective approach to collecting data using self-reports of workplace violence might have led to recall and report bias.
- The results of purposive sampling were greatly influenced due to the preconceptions of the researchers. Therefore, the researchers need to clearly understand the basic characteristics of the population under study.

## INTRODUCTION

A nursing shortage is occurring worldwide and is arousing great concern.<sup>1</sup> The European Commission reported that 590,000 nurses would be shortage by the end of 2020.<sup>2</sup> In the United States, by the end of 2020, the nursing shortage will reach 340,000 nurses.<sup>3</sup> In 2016, the total number of registered nurses in China reached 3.507 million. Compared with 2010, the number of registered nurses per 1,000 people increased from 1.52 to 2.54.<sup>4</sup> The ratio of physicians to nurses in China has increased from 1:1.16 in 2010 to 1:45 in 2016, and the inverse ratio of physician and nurse was fundamentally reversed for a long time.<sup>4</sup> In 2001–2002, the results of the Health Resources Report for the Western Pacific Region concerning the present situation, shortages, and future trends within the world of nursing showed that the ratio of physicians to nurses in Hongkong, Japan, Thailand, Germany, and the United Kingdom was more than 1:4, and that the ratio of physicians to nurses in Finland, Norway, and Canada was over 1:6.<sup>5</sup> Without a doubt, an inadequate supply of nurses has been a long-existing problem in China. The most recognized cause of nursing shortage seems to be nurses leaves the nursing profession.<sup>6-7</sup> Many nurses tend to leave the nursing profession, and this is regarded as a global political concern.<sup>8</sup>

Turnover intention is defined as the possibility that employees will leave a job within a certain period.<sup>9</sup> The first study on turnover used the participant determination model proposed by March and Simon in 1958.<sup>10</sup> Following on from that study, standardized models, for example, the decision-making process model, the employee-withdrawal behavior model, and the intermediate chain extension model, have been constructed, using the peak mutation model, the unfolding model, and the loss motivation model.<sup>11-15</sup> Among these theoretical models and studies, turnover intention has been considered to be one of the best factors to predict turnover behavior, and has shown significant explanatory power.<sup>16</sup> Therefore, turnover intention has been the focus of this study.

1  
2  
3  
4  
5  
6  
7  
8  
9  
10  
11  
12  
13  
14  
15  
16  
17  
18  
19  
20  
21  
22  
23  
24  
25  
26  
27  
28  
29  
30  
31  
32  
33  
34  
35  
36  
37  
38  
39  
40  
41  
42  
43  
44  
45  
46  
47  
48  
49  
50  
51  
52  
53  
54  
55  
56  
57  
58  
59  
60

Workplace violence can be divided into physical violence (including hitting, shooting, kicking, slapping, pushing, biting, pinching, wounding using sharp objects, and sexual assault and rape) and psychological violence (including verbal abuse, threats and sexual harassment).<sup>17</sup> Job satisfaction represents the extent to which personnel's demands and desires are met within the workplace.<sup>18</sup> Burnout is a syndrome involving emotional exhaustion and depersonalization and one where personal accomplishments are reduced, resulting in continuous work stress that has not been effectively handled.<sup>19</sup> Perceived organizational support refers to the overall perception and beliefs of employees about how organizations view their contributions and care about their interests.<sup>20</sup>

In Kim's review, it was reported that the mean score for turnover intention among Korean nurses was between 2.40 and 3.85.<sup>21</sup> About 40% of the registered nurses in a teaching hospital in Malaysia were reported to have a turnover intention, and the results indicated that age, work experience, nursing education, and overall job satisfaction significantly influence an intention to leave.<sup>22</sup> A survey was conducted in 4 general hospitals in Seoul, and the findings showed that factors influencing turnover intention involve the organizational system, depersonalization, the physical environment, work role, and the organizational climate.<sup>23</sup> A review of the research literature revealed that factors related to the work environment were the most important in respect of nurses' turnover intentions.<sup>24</sup> A study has been conducted among nurses in 1,105 general acute care hospitals in Europe and the United States, and showed that the rates of nurse burnout ranged from 10% to 78%, with the job dissatisfaction rate ranging from 11% to 56% and the intention to leave rate ranging from 14% to 49%.<sup>25</sup>

However, turnover intention is usually affected through a variety of factors, for example, work stress,<sup>9</sup> <sup>26</sup> workplace violence,<sup>27</sup> job satisfaction,<sup>28</sup> burnout,<sup>28</sup> perceived organizational support,<sup>29</sup> organizational commitment,<sup>29</sup> among others.

1  
2  
3  
4  
5  
6  
7  
8  
9  
10  
11  
12  
13  
14  
15  
16  
17  
18  
19  
20  
21  
22  
23  
24  
25  
26  
27  
28  
29  
30  
31  
32  
33  
34  
35  
36  
37  
38  
39  
40  
41  
42  
43  
44  
45  
46  
47  
48  
49  
50  
51  
52  
53  
54  
55  
56  
57  
58  
59  
60

Workplace violence is a widely reported phenomenon among nurses in medical settings, and it influences the turnover intention of nurses.<sup>30</sup> A study indicated that turnover intention was positively associated with exposure types of violence.<sup>27</sup> McDowell found workplace violence to be significantly related to burnout ( $r = 0.56$ ,  $P < 0.01$ ) and turnover intention ( $r = 0.24$ ,  $P < 0.01$ ) for all direct care paraprofessionals.<sup>31</sup> The previous results determined that a statistically significant relationship existed between turnover intention and workplace violence.<sup>32 33</sup> Therefore, workplace violence is one of the influential factors in turnover intention.<sup>34 35</sup>

Job satisfaction has been considered as a major contributory factor to intending to stay in a job, in previous studies.<sup>24 26 36</sup> In contrast to this viewpoint, previous studies have also shown that job satisfaction mainly affects turnover intention in respect of organizational commitment.<sup>37 38</sup> Furthermore, a third view has showed that two considerations, namely having demands and desires met and organizational commitment, exist simultaneously regarding job satisfaction and turnover intention.<sup>39</sup>

Moreover, substantial evidence has indicated that employees with high levels of burnout are more prone to turnover intention.<sup>33 40</sup> Some studies have reported that perceived organizational support is a predictor of turnover intention.<sup>37 39 41 42</sup> One study has indicated that perceived organizational support is negatively associated with turnover intention.<sup>43</sup>

In China, a study from Shanghai indicated that 22.5% of nurses expressed their intention to leave the emergency department within the following year.<sup>44</sup> The mean score for turnover intention of ICU nurses was between 1.95 and 2.92 in Shandong.<sup>45</sup> A survey of turnover intention among 10 tertiary hospitals' nurses in Beijing showed that 16.5% of nurses may leave the current work unit in the following year.<sup>46</sup> An investigation in Tianjin showed that work support had a negative influence on turnover intention.<sup>47</sup> Previous results reflected a significant correlation between psychological capital,

1  
2  
3 work engagement, and turnover intention among primary nurses.<sup>48</sup> Substantial studies have mainly  
4 investigated the relationship among job stress, job satisfaction, job engagement, organizational support  
5 and turnover intention among Chinese nurses in one province.<sup>6 45-49</sup> Therefore, the researchers selected  
6 nurses from tertiary hospitals in several provinces and further verified the relationship between  
7 workplace violence frequency and turnover intention in this study. The novelty of this study was the  
8 inclusion of organizational support and the use of both linear regression and the structural equation  
9 model (SEM).  
10  
11  
12  
13  
14  
15  
16  
17  
18  
19

20 Based on the above evidence, researchers proposed the present study with the following  
21 hypotheses: (1) workplace violence, job satisfaction, burnout and organizational support had different  
22 effects on turnover intention; (2) workplace violence had a significant impact on job satisfaction and  
23 burnout; (3) organizational support served as a moderator between workplace violence and turnover  
24 intention; and (4) organizational support served as a moderator between job satisfaction and burnout.  
25  
26  
27  
28  
29  
30  
31  
32

33 The present study aims to examine the relationship between workplace violence, job satisfaction,  
34 burnout, organizational support and turnover intention, and explore factors associated with turnover  
35 intention among nurses in Chinese tertiary hospitals.  
36  
37  
38  
39

## 40 **METHODS**

### 41 **Participants and sampling**

42 A cross-sectional study of nurses was conducted from August 2016 through January 2017 in eastern  
43 (Beijing), central (Heilongjiang, Anhui), and western (Shaanxi) of China. A total of nine public tertiary  
44 hospitals in four provinces (municipalities) were selected using a purposive sampling method. The total  
45 number of nurses in 9 hospitals (the hospitals were similar in size, department setting, and number of  
46 nurses) is about 18,900; a total of 2,067 samples were extracted, with these nurses accounting for  
47  
48  
49  
50  
51  
52  
53  
54  
55  
56  
57  
58  
59  
60

1  
2  
3 10.9% of the total nurses. On average, 225 nurses from each hospital were extracted (in the actual  
4  
5  
6 sampling process, the sample size of each hospital was slightly different, but it was roughly 225  
7  
8 people). All investigators were subject to unified training before starting the investigation and could act  
9  
10 as investigators when qualified. Permission to conduct the study was acquired from the managers, and  
11  
12 the medical dispute resolution and human resources departments of the hospitals concerned. An  
13  
14 anonymous, self-administered questionnaire was used to conduct face-to-face surveys.  
15  
16 Paper-and-pencil questionnaires were filled out by each participant. Investigators (who were not unit  
17  
18 supervisors) conducted the surveys, and they were responsible for explaining the purpose of the study  
19  
20 and reminding participants of the matters to pay attention to in filling out the questionnaire. The  
21  
22 Cronbach alpha of each original scale was as follows: Workplace Violence Scale was 0.873,<sup>50</sup> Chinese  
23  
24 Maslach Burnout Inventory General Survey was 0.864,<sup>51</sup> Minnesota Job Satisfaction Questionnaire  
25  
26 Revised Short Version was 0.891,<sup>52</sup> Perceived Organizational Support-Simplified Version Scale was  
27  
28 0.921,<sup>53</sup> and Turnover Intention Scale was 0.770.<sup>54</sup> The two public hospitals in Harbin (the Fourth  
29  
30 Affiliated Hospital of Harbin Medical University and the principal hospital of Harbin) were selected as  
31  
32 the locations for our pre-study before the formal investigation (200 questionnaires were distributed and  
33  
34 returned, and these data were excluded in the formal survey data). The investigators and hospital  
35  
36 coordinators distributed and took back the questionnaires immediately from the participants. A total of  
37  
38 2,067 questionnaires were distributed to nurses, all of which were returned. However, 306  
39  
40 questionnaires were missing data or blank, which left 1,761 valid questionnaires (effective response  
41  
42 rate = 85.20%). The following conditions were selected as the inclusion criteria for this study: (1)  
43  
44 having a practicing nurse certificate; (2) having at least one year of clinical nursing experience; (3)  
45  
46 being still engaged in clinical nursing work during the investigation; and (4) voluntary participation  
47  
48  
49  
50  
51  
52  
53  
54  
55  
56  
57  
58  
59  
60



1  
2  
3 without prejudice to the participants' work. The exclusion criteria for this study were rehire after  
4  
5 retirement nurses, refresher nurses, and nurses who had not passed the probation period.  
6  
7

## 8 **Questionnaire**

### 9 *Demographic characteristics*

10  
11 Demographic information on the nurses was collected, including sex, age, marital status, educational  
12  
13 background, professional qualifications, employment form, department, years of experience, and daily  
14  
15 working hours. Age was categorized as  $\leq 30$ , 31–50, and  $\geq 51$  years old. Marital status was categorized  
16  
17 as married and single/divorced/widowed. Educational background was classified as junior college or  
18  
19 below, undergraduate, and master's degree or above. Professional qualifications were categorized as  
20  
21 primary title, intermediate title, and senior title. Employment form was categorized as long-term  
22  
23 employee and temporary employee. Department was classified as emergency department, internal  
24  
25 medicine, surgery, obstetrics and gynecology, pediatrics, and other. Work experience was divided into 4  
26  
27 categories:  $\leq 4$ , 5–10, 11–20, and  $\geq 21$  years. Daily working time was categorized as  $\leq 8$ , 8–10, 10–12,  
28  
29 and  $\geq 12$  hours.  
30  
31  
32  
33  
34  
35  
36  
37

### 38 *Workplace Violence Scale*

39  
40 The Workplace Violence Scale developed by the International Labour Office, the International Council  
41  
42 of Nurses, the World Health Organization, and Public Services International Joint Program on  
43  
44 Workplace Violence in the Health Sector in 2003 was used to measure workplace violence.<sup>50</sup> The scale  
45  
46 used in this study consists of 2 dimensions (physical violence and psychological violence) and has 9  
47  
48 items that were adopted from these scales. Each item is scored on a 4-point scale reflecting  
49  
50 respondents' frequency of exposure to workplace violence (0 = 0 times, 1 = 1 time, 2 = 2–3 times, and  
51  
52 3 =  $\geq 4$  times). The total possible score ranges from 0 to 27, with a higher total score indicating a  
53  
54  
55  
56  
57

1  
2  
3 higher frequency of exposure to workplace violence. In the present study, Cronbach's  $\alpha$  for the  
4  
5  
6 Workplace Violence Scale was 0.860.

### 7 8 ***Burnout***

9  
10 Burnout was assessed using the Chinese Maslach Burnout Inventory General Survey (CMBI-GS) in  
11  
12 the present study, with a total of 15 items, developed by Li YX, and proven to be valid.<sup>51 55-56</sup> The  
13  
14 CMBI-GS is categorized into 3 subscales reflecting job burnout: emotional exhaustion,  
15  
16 depersonalization, and reduced personal accomplishment. The response options for each item on the  
17  
18 CMBI-GS are rated from 0 (never) to 6 (daily), based on the frequency of occurrence of the specific  
19  
20 work feelings of the respondent. The score of the 3 subscales is equal to the average of the sum of  
21  
22 items for each of the subscales. The total possible score is calculated through adding the scores for 3  
23  
24 subscales, and it ranges from 0 to 18 points, with a higher score indicating a higher level of burnout. In  
25  
26 terms of the average score of all items, a score less than 8.5 points indicates lower job burnout, a score  
27  
28 of 8.5–14.2 points indicates that burnout is serious, and burnout is extremely serious when the score is  
29  
30 greater than 14.2 points. In this study, Cronbach's  $\alpha$  for the CMBI-GS was 0.873. The internal  
31  
32 consistency coefficients were 0.834, 0.826, 0.806, and 0.812, for emotional exhaustion,  
33  
34 depersonalization, and reduced personal accomplishment, respectively.  
35  
36  
37  
38  
39  
40  
41  
42

### 43 ***Job satisfaction***

44  
45 The Minnesota Job Satisfaction Questionnaire Revised Short Version (MJSQ-RSV) was used in this  
46  
47 study to assess participants' satisfaction with their job.<sup>52 57</sup> The MJSQ-RSV consists of 20 items,  
48  
49 including 12 items measuring intrinsic satisfaction and 8 items measuring extrinsic satisfaction. Each  
50  
51 item is rated on a 5-point Likert scale (1 = strongly unsatisfied, 2 = unsatisfied, 3 = uncertain, 4 =  
52  
53 satisfied, and 5 = strongly satisfied). Intrinsic satisfaction refers to the degree of satisfaction with the  
54  
55  
56  
57  
58  
59  
60

1  
2  
3 factors involved in the job content. Extrinsic satisfaction refers to the degree of satisfaction of the  
4 individual in terms of current job rewards, promotion, and leadership style. The higher the participant's  
5 self-rating, the higher their satisfaction with the job. The present study revealed that Cronbach's  $\alpha$  for  
6 the MJSQ-RSV was 0.882, and for the two subscales it was 0.872 (intrinsic satisfaction) and 0.896  
7 (extrinsic satisfaction).  
8  
9

### 10 11 12 13 14 15 16 ***Perceived organizational support scale***

17 Perceived organizational support was measured using the Perceived Organizational Support-Simplified  
18 Version Scale (POS-SVS). Previous studies have found the POS-SVS to have high reliability and  
19 validity as a measure of perceived organizational support.<sup>37 42 53</sup> It consists of nine self-report items,  
20 which comprise two reverse questions (even if employees try to do the best job they can, the work unit  
21 doesn't notice it; the work unit rarely cares about employees). The other 7 items mainly indicate that  
22 work unit cares about the well-being and job satisfaction of employees and pays attention to the work  
23 goals and values and employees' opinions; employees can get help when they encounter difficulties;  
24 and the unit will be proud of what employees have achieved. Each item is rated on a 5-point Likert  
25 scale, and ranged from 1 (extremely inconsistent) to 5 (extremely consistent). The total possible score  
26 is calculated through adding the scores for all items, and it ranges from 9 to 45 points, with a higher  
27 score indicating a higher organizational support. In this study, Cronbach's  $\alpha$  for the POS-SVS was  
28 0.890.  
29  
30  
31  
32  
33  
34  
35  
36  
37  
38  
39  
40  
41  
42  
43  
44  
45  
46

### 47 ***Turnover intention scale***

48 The Turnover Intention Scale, which has been used to measure turnover intention among nurses was  
49 used in the present study. The turnover intention scale was developed by Lee and Lee,<sup>54</sup> and has been  
50 widely used in many studies.<sup>9 46 47</sup> This 6-item scale is divided into 3 dimensions: the possibility of an  
51  
52  
53  
54  
55  
56  
57  
58  
59  
60

1  
2  
3 employee quitting his/her present job, the motivation for employees to find other jobs, and the  
4  
5 possibility of employees having access to external work. Each item is scored on a 4–point scale  
6  
7 reflecting participants' intention to leave (1 = never, 2 = seldom, 3 = occasionally, and 4 = often). The  
8  
9 total possible score is counted through adding the scores for all items, and it ranges from 6 to 24 points,  
10  
11 with a higher score indicating a stronger intention to leave. The extent of turnover intention is divided  
12  
13 into 4 levels according to the different total average score of turnover intention. A total average score  $\leq$   
14  
15 1 indicates that turnover intention is particularly low, less low when it is from 1 to 2, higher when it is  
16  
17 from 2 to 3, and exceptionally high when it is greater than 3. In the present study, Cronbach's  $\alpha$  for the  
18  
19 Turnover Intention Scale was 0.862.  
20  
21  
22  
23  
24

#### 25 **Data Analysis**

26  
27 EpiData version 3.1 was used to establish the study's database. Missing data or poor-quality  
28  
29 questionnaires were eliminated. To ensure accuracy, two trained personnel entered the data after all the  
30  
31 surveys were completed. IBM SPSS V.19.0 was used for the data analysis in this study. Descriptive  
32  
33 statistics, including numbers (n), percentages (%), means, and standard deviations (SD) were calculated  
34  
35 for the demographic variables. We used one-way analysis of variance (ANOVA) or independent  
36  
37 sample t–tests to compare group differences concerning the measurements of the continuous variables.  
38  
39 Pearson's correlations were used to examine correlations among the continuous variables. Linear  
40  
41 regression analysis was used to examine the associations of the demographic variables and workplace  
42  
43 violence, job satisfaction, burnout, perceived organizational support, and turnover intention variables.  
44  
45 Statistics, including F values,  $R^2$ ,  $R^2$ –changes ( $\Delta R^2$ ), standardized regression coefficients ( $\beta$ ), and  
46  
47 P–values for each step in the regression model were reported. All study variables were tested for  
48  
49 multicollinearity. A P–value  $< 0.05$  was considered statistically significant.  
50  
51  
52  
53  
54  
55  
56

Path analysis was used to examine the relationship among the five variables, including workplace violence, job satisfaction, burnout, perceived organizational support, and turnover intention. A SEM for path analysis was constructed using the AMOS 17.0 program to analyze the effect of workplace violence on job satisfaction, burnout, perceived organizational support, and turnover intention. The model was considered to have a good fit when all path coefficients were significant at the level of 0.05;  $\chi^2/df$ , was below 5; the standardized root mean square residual (SRMR) was below 0.08; the root mean square error of approximation (RMSEA) was below 0.08; the root mean square residual (RMR) was below 0.10; as well as the goodness of fit index (GFI), the normed fit index (NFI), Tucker–Lewis incremental fit (TLI) and comparative fit index (CFI) being  $\geq 0.90$ .

#### **STROBE Statement**

The STROBE (Strengthening the Reporting of Observational Studies in Epidemiology) guidelines are followed in this study.

#### **Ethical Considerations**

Ethical approval to conduct this study was granted by the Research Ethics Committee of Harbin Medical University, and informed consent was obtained from each hospital and the nurses involved in the investigation. All participants gave their informed consent before the survey; they were assured that their personal information would be kept confidential.

## **RESULTS**

#### **Demographic Characteristics of the Participants**

The demographic characteristics of the respondents are shown in Table 1.

**Table 1. Demographic characteristics of participants (N=1761).**

| <b>Demographic variables</b> | <b>n</b> | <b>%</b> |
|------------------------------|----------|----------|
|------------------------------|----------|----------|

|                                    |      |      |
|------------------------------------|------|------|
| <b>Gender</b>                      |      |      |
| Male                               | 60   | 3.4  |
| Female                             | 1701 | 96.6 |
| <b>Age group (years)</b>           |      |      |
| ≤ 30                               | 899  | 51.1 |
| 31-50                              | 793  | 45.0 |
| ≥ 51                               | 69   | 3.9  |
| <b>Level of education</b>          |      |      |
| Below undergraduate                | 715  | 40.6 |
| Undergraduate                      | 1020 | 57.9 |
| Master's degree or above           | 26   | 1.5  |
| <b>Marital status</b>              |      |      |
| Married                            | 1128 | 64.1 |
| Single/ divorced/ widowed          | 633  | 35.9 |
| <b>Professional qualifications</b> |      |      |
| Primary title                      | 1161 | 65.9 |
| Intermediate title                 | 528  | 30.0 |
| Senior title                       | 72   | 4.1  |
| <b>Employment form</b>             |      |      |
| Long-term employee                 | 693  | 39.4 |
| Temporary employee                 | 1068 | 60.6 |
| <b>Department</b>                  |      |      |
| Emergency Department               | 299  | 17.0 |
| Internal Medicine                  | 559  | 31.7 |
| Surgery                            | 543  | 30.8 |
| Obstetrics and Gynecology          | 93   | 5.3  |
| Pediatrics                         | 101  | 5.7  |
| ENT*                               | 82   | 4.7  |
| Other                              | 84   | 4.8  |
| <b>Years of experience</b>         |      |      |
| ≤4                                 | 529  | 30.0 |
| 5-10                               | 619  | 35.2 |
| 11-20                              | 346  | 19.6 |
| ≥21                                | 267  | 15.2 |
| <b>Daily working hours</b>         |      |      |
| ≤ 8                                | 113  | 6.4  |
| 8-10                               | 1485 | 84.3 |
| 10-12                              | 126  | 7.2  |
| ≥ 12                               | 37   | 2.1  |

\* ENT stand for eyes, nose, throat.

### Prevalence of Workplace Violence in the Preceding 12 Months

During the previous 12 months, the prevalence of physical violence and psychological violence toward

1  
2  
3 nurses was 9.60% (169/1761) and 59.64% (1111/1761), respectively. In the past year, respondents  
4  
5 reported an exposure frequency of workplace violence at less than or equal to 3, accounting for 65.9%  
6  
7 of all incidents. The respondents reported that the patients' relatives were the main perpetrators (71.2%,  
8  
9 n = 797), followed by the patients (25.4%, n = 284).

### 13 **The Difference Between Participants' Characteristics and the Multiple Variables Score**

14  
15 Table 2 shows the descriptive association between respondents' characteristics and the burnout, job  
16  
17 satisfaction, organizational support, and turnover intention scores. There was a significant difference in  
18  
19 the score of turnover intention among characteristics involving age group, educational level, different  
20  
21 professional titles, employment form, department, years of experience and daily working hours for  
22  
23 nurses in the tertiary hospitals.

### 27 **Pearson correlations between different measurement variables**

28  
29 Table 3 shows the correlations among the respondents' turnover intention and scores on workplace  
30  
31 violence, burnout, job satisfaction, and perceived organizational support. As expected, the level of  
32  
33 turnover intention was positively correlated with respondents' scores on workplace violence ( $r = 0.122$   
34  
35  $P < 0.001$ ). Burnout was positively associated with turnover intention ( $r = 0.444$ ,  $P < 0.001$ ). The level  
36  
37 of turnover intention was negatively correlated with participants' scores on job satisfaction ( $r = -0.367$ ,  
38  
39  $P < 0.001$ ) and perceived organizational support ( $r = -0.379$ ,  $P < 0.001$ ), respectively.

### 44 **Linear Regression Analysis and Path Analysis of Factors Related to Turnover Intention**

45  
46 The predicting factors of turnover intention are presented in Table 4. Demographic variables that were  
47  
48 significantly related to turnover intention were used as control variables. Demographic variables alone  
49  
50 explained less than 3% of the overall variance in turnover intention. As shown in Block 2, workplace  
51  
52 violence was positively associated with turnover intention ( $\beta = 0.034$ ,  $P < 0.001$ ). It explained another  
53  
54 2% of the overall variance in turnover intention. In Block 3, with the addition of organizational  
55  
56

1  
2  
3  
4  
5  
6  
7  
8  
9  
10  
11  
12  
13  
14  
15  
16  
17  
18  
19  
20  
21  
22  
23  
24  
25  
26  
27  
28  
29  
30  
31  
32  
33  
34  
35  
36  
37  
38  
39  
40  
41  
42  
43  
44  
45  
46  
47

**Table 2. Burnout, job satisfaction, perceived organizational support and turnover intention according to general characteristics.**

| Characteristics           | Burnout     | Job satisfaction | Workplace violence | Perceived organizational support | Turnover intention |
|---------------------------|-------------|------------------|--------------------|----------------------------------|--------------------|
|                           | M ± SD      | M ± SD           | M ± SD             | M ± SD                           | M ± SD             |
| <b>Gender</b>             |             |                  |                    |                                  |                    |
| Male                      | 6.23 ± 3.34 | 3.54 ± 0.55      | 3.15 ± 3.92        | 3.27 ± 0.57                      | 2.30 ± 0.71        |
| Female                    | 6.53 ± 3.08 | 3.52 ± 0.54      | 2.11 ± 2.60        | 3.10 ± 0.64                      | 2.40 ± 0.60        |
| F/t                       | -0.757      | 0.256            | 8.931**            | 1.991*                           | -1.263             |
| <b>Age group (years)</b>  |             |                  |                    |                                  |                    |
| ≤ 30                      | 6.58 ± 3.03 | 3.54 ± 0.54      | 1.81 ± 2.38        | 3.13 ± 0.64                      | 2.44 ± 0.61        |
| 31-50                     | 6.53 ± 3.16 | 3.50 ± 0.55      | 2.36 ± 2.73        | 3.07 ± 0.65                      | 2.39 ± 0.60        |
| ≥ 51                      | 5.80 ± 3.07 | 3.55 ± 0.52      | 3.97 ± 4.09        | 3.14 ± 0.57                      | 2.04 ± 0.56        |
| F/t                       | 2.040       | 1.672            | 26.537**           | 1.986                            | 14.144**           |
| <b>Level of education</b> |             |                  |                    |                                  |                    |
| Below undergraduate       | 6.62 ± 3.01 | 3.52 ± 0.54      | 1.96 ± 2.45        | 3.11 ± 0.61                      | 2.38 ± 0.63        |
| Undergraduate             | 6.48 ± 3.13 | 3.53 ± 0.55      | 2.26 ± 2.77        | 3.10 ± 0.65                      | 2.42 ± 0.58        |
| Master's degree or above  | 5.54 ± 3.40 | 3.58 ± 0.54      | 2.58 ± 3.76        | 3.27 ± 0.78                      | 2.08 ± 0.61        |
| F/t                       | 1.737       | 0.202            | 3.161*             | 0.888                            | 4.468*             |
| <b>Marital status</b>     |             |                  |                    |                                  |                    |
| Married                   | 6.45 ± 3.12 | 3.52 ± 0.54      | 2.25 ± 2.69        | 3.10 ± 0.65                      | 2.38 ± 0.60        |
| Single/ divorced/ widowed | 6.65 ± 3.03 | 3.53 ± 0.56      | 1.96 ± 2.61        | 3.12 ± 0.63                      | 2.43 ± 0.61        |
| F/t                       | -1.304      | -0.203           | 4.789*             | -0.843                           | -1.658             |
| <b>Professional title</b> |             |                  |                    |                                  |                    |
| Primary title             | 6.67 ± 3.04 | 3.53 ± 0.54      | 1.90 ± 2.38        | 3.11 ± 0.65                      | 2.45 ± 0.60        |
| Intermediate title        | 6.42 ± 3.17 | 3.49 ± 0.56      | 2.57 ± 3.05        | 3.07 ± 0.62                      | 2.31 ± 0.61        |
| Senior title              | 4.87 ± 2.77 | 3.70 ± 0.50      | 2.86 ± 3.34        | 3.25 ± 0.68                      | 2.17 ± 0.59        |
| F/t                       | 12.077**    | 4.781**          | 14.412**           | 2.735                            | 15.543**           |



|                            |             |             |             |             |             |
|----------------------------|-------------|-------------|-------------|-------------|-------------|
| <b>Employment form</b>     |             |             |             |             |             |
| Long-term employee         | 6.71 ± 3.30 | 3.48 ± 0.57 | 2.46 ± 2.80 | 3.05 ± 0.65 | 2.32 ± 0.60 |
| Temporary employee         | 6.40 ± 2.94 | 3.55 ± 0.52 | 1.93 ± 2.55 | 3.14 ± 0.63 | 2.45 ± 0.61 |
| <b>F/t</b>                 | 2.025*      | -2.460*     | 16.717**    | -2.779**    | -4.377**    |
| <b>Department</b>          |             |             |             |             |             |
| Emergency Department       | 6.51 ± 3.21 | 3.51 ± 0.60 |             | 3.12 ± 0.70 | 2.37 ± 0.63 |
| Internal Medicine          | 6.40 ± 3.06 | 3.55 ± 0.55 | 1.90 ± 2.38 | 3.15 ± 0.64 | 2.38 ± 0.60 |
| Surgery                    | 6.73 ± 3.05 | 3.50 ± 0.54 | 2.00 ± 2.47 | 3.05 ± 0.63 | 2.45 ± 0.59 |
| Obstetrics and Gynecology  | 6.19 ± 2.71 | 3.54 ± 0.50 | 2.65 ± 3.31 | 3.13 ± 0.58 | 2.44 ± 0.56 |
| Pediatrics                 | 7.09 ± 3.23 | 3.47 ± 0.51 | 2.40 ± 2.76 | 3.08 ± 0.64 | 2.35 ± 0.67 |
| ENT                        | 5.87 ± 3.20 | 3.56 ± 0.48 | 1.74 ± 2.31 | 3.12 ± 0.62 | 2.25 ± 0.54 |
| Other                      | 6.36 ± 3.13 | 3.55 ± 0.55 | 2.58 ± 3.29 | 3.11 ± 0.57 | 2.32 ± 0.66 |
| <b>F/t</b>                 | 1.938       | 0.639       | 3.905*      | 1.211       | 2.234*      |
| <b>Years of experience</b> |             |             |             |             |             |
| ≤4                         | 6.26 ± 2.78 | 3.60 ± 0.51 | 1.70 ± 2.56 | 3.21 ± 0.58 | 2.37 ± 0.57 |
| 5-10                       | 6.88 ± 3.18 | 3.49 ± 0.55 | 2.22 ± 2.65 | 3.06 ± 0.67 | 2.49 ± 0.63 |
| 11-20                      | 6.75 ± 3.10 | 3.45 ± 0.58 | 2.28 ± 2.54 | 3.04 ± 0.67 | 2.46 ± 0.59 |
| ≥21                        | 5.94 ± 3.33 | 3.53 ± 0.53 | 2.66 ± 2.92 | 3.08 ± 0.65 | 2.18 ± 0.58 |
| <b>F/t</b>                 | 7.859**     | 6.249**     | 8.745**     | 6.690**     | 18.233**    |
| <b>Daily working hours</b> |             |             |             |             |             |
| ≤ 8                        | 6.08 ± 3.01 | 3.65 ± 0.51 | 2.20 ± 2.96 | 3.25 ± 0.69 | 2.24 ± 0.59 |
| 8-10                       | 6.53 ± 3.09 | 3.52 ± 0.55 | 2.09 ± 2.55 | 3.10 ± 0.64 | 2.41 ± 0.60 |
| 10-12                      | 6.73 ± 2.95 | 3.45 ± 0.49 | 2.06 ± 2.78 | 3.05 ± 0.57 | 2.42 ± 0.64 |
| ≥ 12                       | 7.11 ± 3.71 | 3.49 ± 0.58 | 4.14 ± 4.58 | 3.10 ± 0.62 | 2.37 ± 0.68 |
| <b>F/t</b>                 | 1.415       | 3.096*      | 7.195**     | 2.229       | 2.826*      |

\* P < 0.05, \*\* P < 0.01

1  
2  
3  
4  
5  
6  
7  
8  
9  
10  
11  
12  
13  
14  
15  
16  
17  
18  
19  
20  
21  
22  
23  
24  
25  
26  
27  
28  
29  
30  
31  
32  
33  
34  
35  
36  
37  
38  
39  
40  
41  
42  
43  
44  
45  
46  
47

**Table 3. Pearson correlations among workplace violence, burnout, job satisfaction, perceived organizational support and turnover intention.**

| Variables                                  | 1        | 2        | 3        | 4        | 5        | 6        | 7       | 8       | 9       | 10 |
|--------------------------------------------|----------|----------|----------|----------|----------|----------|---------|---------|---------|----|
| <b>1. Turnover intention</b>               | 1        |          |          |          |          |          |         |         |         |    |
| <b>2. Workplace violence</b>               | 0.122**  | 1        |          |          |          |          |         |         |         |    |
| <b>3. Burnout</b>                          | 0.444**  | 0.206**  | 1        |          |          |          |         |         |         |    |
| <b>4. Emotional exhaustion</b>             | 0.418**  | 0.213**  | 0.792**  | 1        |          |          |         |         |         |    |
| <b>5. Depersonalization</b>                | 0.460**  | 0.220**  | 0.846**  | 0.754**  | 1        |          |         |         |         |    |
| <b>6. Reduced Personal Accomplishment</b>  | 0.102**  | 0.025    | 0.545**  | 0.017    | 0.116**  | 1        |         |         |         |    |
| <b>7. Perceived organizational support</b> | -0.379** | -0.172** | -0.527** | -0.445** | -0.495** | -0.216** | 1       |         |         |    |
| <b>8. Job satisfaction</b>                 | -0.367** | -0.188** | -0.562** | -0.478** | -0.524** | -0.231** | 0.675** | 1       |         |    |
| <b>9. Intrinsic satisfaction</b>           | -0.330** | -0.171** | -0.532** | -0.441** | -0.493** | -0.232*  | 0.626** | 0.946** | 1       |    |
| <b>10. Extrinsic satisfaction</b>          | -0.390** | -0.176** | -0.505** | -0.456** | -0.476** | -0.178** | 0.673** | 0.900** | 0.795** | 1  |

\* P<0.05, \*\* P<0.01

**Table 4. Predicting factors of turnover intention.**

| Variables                       | Block 1 ( $\beta$ ) | Block 2 ( $\beta$ ) | Block 3 ( $\beta$ ) | Block 4 ( $\beta$ ) | Block 5 ( $\beta$ ) |
|---------------------------------|---------------------|---------------------|---------------------|---------------------|---------------------|
| Age group                       | -0.055              | -0.076*             | -0.055              | -0.055              | -0.051              |
| Level of education              | 0.028               | 0.022               | 0.028               | 0.025               | 0.026               |
| Professional qualifications     | 0.120**             | 0.128**             | 0.098**             | 0.095**             | 0.044               |
| Employment form                 | 0.081*              | 0.087*              | 0.108**             | 0.098**             | 0.146**             |
| Department                      | 0.008               | 0.011               | 0.010               | 0.011               | 0.007               |
| Years of experience             | 0.034               | 0.038               | 0.014               | 0.006               | 0.001               |
| Daily working hours             | 0.056               | 0.046               | 0.030               | 0.012               | 0.009               |
| Workplace violence              |                     | 0.034**             | 0.019**             | 0.016**             | 0.005               |
| Organizational support          |                     |                     | -0.039**            | -0.022**            | -0.012**            |
| Intrinsic satisfaction          |                     |                     |                     | 0.001               | 0.008*              |
| Extrinsic satisfaction          |                     |                     |                     | -0.037**            | -0.030**            |
| Emotional exhaustion            |                     |                     |                     |                     | 0.051**             |
| Depersonalization               |                     |                     |                     |                     | 0.113**             |
| Reduced Personal Accomplishment |                     |                     |                     |                     | 0.004               |
| <i>F</i>                        | 6.374**             | 10.553**            | 41.686**            | 41.863**            | 51.582**            |
| <i>R</i> <sup>2</sup>           | 0.025               | 0.046               | 0.176               | 0.208               | 0.293               |
| $\Delta R^2$                    | 0.025**             | 0.021**             | 0.130**             | 0.032**             | 0.085**             |

\*  $P < 0.05$ , \*\*  $P < 0.01$

support to the model, the explained variance jumped to 13%, meaning that it was this factor that explained most of the variance. Extrinsic satisfaction added another 3%, while emotional exhaustion and depersonalization contributed nearly 9%. Furthermore, it should be noted that professional qualifications were significant in every step except in the final step, when burnout was added to the model. It was interesting that employment form was significant throughout.

Path analysis using the SEM was performed, which is shown in Figure 1. workplace violence had a negative effect on job satisfaction, which was mediated through perceived organizational support. The total effect ( $\beta = -0.19$ ) of workplace violence on job satisfaction was comprised of not only its direct effect ( $\beta = -0.12$ ), but also its indirect effect ( $\beta = -0.07 = -0.13 \times 0.50$ ), mediated through perceived organizational support. The total effect ( $\beta = 0.53$ ) of workplace violence on turnover intention comprised its direct effect ( $\beta = 0.36$ ), and its indirect effect ( $\beta = 0.17 = (-0.12) \times 0.19 + (-0.13) \times (-1.05) + 0.25 \times (-0.17) \times (-1.05) + (-0.13) \times 0.50 \times (-0.19)$ ). Job satisfaction was negatively

1  
2  
3 associated with burnout. On the other hand, job burnout was positively related to turnover intention.  
4  
5  
6 The squared multiple correlations value was 0.432, which implies that the built SEM explained 43.2%  
7  
8 of the total variance of turnover intention.  
9

## 10 11 12 **DISCUSSION**

13  
14  
15 In this cross-sectional hospital-based study of nurses, we evaluated the incidence rate of  
16  
17 workplace violence and the mean score of overall perceptions of turnover intention. The total incidence  
18  
19 rate of workplace violence was 63.6% (1120/1761) during the past year. This finding was close to a  
20  
21 finding from a large sample cross-sectional survey on the prevalence of workplace violence among  
22  
23 Chinese nurses.<sup>17</sup> Moreover, the incidence of Chinese nurses experiencing workplace violence is higher  
24  
25 than that of nurses in other countries.<sup>58-59</sup> This may be due to cultural variations across different  
26  
27 countries in terms of workplace violence perceptions, and the variety of assessment scales used in  
28  
29 different studies. As far as the personal characteristics of nurses are concerned, previous studies have  
30  
31 proved that young age, lack of life and work experience, low professional qualifications, low education  
32  
33 levels and poor interpersonal relationships are the risk factors for workplace violence against Chinese  
34  
35 nurses.<sup>17</sup> In terms of organizational characteristics, high-risk departments (emergency department,  
36  
37 orthopedics department, and pediatrics department), poor organizational climate, lack of team spirit,  
38  
39 heavy workload, and shortage of nurses are also frequent factors of occupational violence among  
40  
41 nurses. In China, imperfect healthcare laws and regulations, insufficient practice in dealing with  
42  
43 medical disputes, and negative reports from the media are also an important inducing factor. Regarding  
44  
45 aspect of patients and their relatives, high medical service expectations, long waiting times, high  
46  
47 medical costs, unmet requirements, and poor communication between nurses and patients also lead to  
48  
49  
50  
51  
52  
53  
54  
55  
56  
57  
58  
59  
60

1  
2  
3 workplace violence. Therefore, we suggest that the government should supervise the media to ensure  
4  
5 the accuracy and authenticity of media coverage. Ward management needs strengthening; for example,  
6  
7 surveillance cameras and alarms should be installed in hospital ward corridors, lights should be  
8  
9 sufficiently bright in work areas during the night, etc. We further advise hospitals to use the Hazard  
10  
11 Risk Matrix to identify hospital workplaces at risk for violence,<sup>60</sup> to provide violence-related training  
12  
13 for nurses and provide psychological support, to instruct all staff about the value of nurses, and to  
14  
15 foster nurses' pride in their work and develop an excellent hospital culture. These measures are  
16  
17 conducive to reducing the occurrence of hospital workplace violence.  
18  
19  
20  
21  
22

23 Although different measurement tools for turnover intention were used in different studies, the  
24  
25 average scores and percentages of perceived high turnover intention have been used as a reference for  
26  
27 measuring potential turnover behavior.<sup>61</sup> The total mean score of overall perception of turnover  
28  
29 intention is greater than 2 points, which means that the turnover intention of nurses is high. Based on  
30  
31 this standard, 545 participants had a low turnover intention, but 1216 (69.1%) participants had a high  
32  
33 turnover intention. Meanwhile, a total of 291 of the 1216 nurses (23.9%) with a higher turnover  
34  
35 intention tended to want to leave more strongly (mean score of turnover intention > 3). The Chinese  
36  
37 nurses intending to leave their current profession was higher than in Malaysia,<sup>22</sup> America,<sup>25</sup> Finland,<sup>25</sup>  
38  
39 and Greece.<sup>25</sup> The reason for this phenomenon may be attributed to two aspects. On the one hand,  
40  
41 nursing is a professional, intellectual and practical specialty. With the increase in social demand for  
42  
43 nurses, nurses have certain advantages in obtaining employment. They can more readily find jobs,  
44  
45 which increases the likelihood of nurses leaving their current jobs. On the other hand, the contradiction  
46  
47 between the low social status of nurses and patient expectations is becoming a prominent problem in  
48  
49 China's medical environment, which is leading to a crisis of confidence. It is worth noting that  
50  
51  
52  
53  
54  
55  
56  
57  
58  
59  
60

1  
2  
3 historical reasons have led to low status and poor professional recognition of Chinese nurses. However,  
4 patients place high demands on the level of health services provided by nurses. This significant contrast  
5  
6 between expectations and reality can easily lead to nurses' resignations. Based on the present study,  
7  
8 more attention need to be paid to nurses in China to reduce their turnover intention.  
9  
10  
11

12  
13 In the univariate analysis, this study found that there were significant differences in self-ratings of  
14 job burnout and job satisfaction among nurses with different professional titles. Furthermore, the  
15 results also indicated that nurses with primary professional titles had higher job burnout and lower job  
16 satisfaction. This finding may be attributed to these nurses often having more direct contact with  
17 patients, a busier work schedule, and work pressure being greater than for nurses with other  
18 professional qualifications.  
19  
20  
21  
22  
23  
24  
25  
26  
27

28 This study also found that burnout has a negative impact on the job satisfaction of nurses, which is  
29 consistent with previous studies.<sup>26 31</sup> The higher the level of burnout, the lower the job satisfaction of  
30 nurses. This may be related to the particularity of the nurses' profession, which requires nurses to have  
31 a keen sense of responsibility, high professional skills, carefulness and patience, and nurses work in  
32 stressful conditions for prolonged periods. Furthermore, a crisis of trust has emerged in China's  
33 medical environment, so nurses need to spend a lot of emotional labor in dealing with the relationship  
34 between nurses and patients. However, positive feedback is rarely received and patient mistrust often  
35 remains, resulting in a state of emotional exhaustion and reduced personal accomplishment, which then  
36 negatively affects the judgment of nurses concerning their work environment and conditions, reducing  
37 in turn the level of their job satisfaction. The SEM results clearly stated that organizational support  
38 serves as a moderator between job satisfaction and burnout. This means that organizational support  
39 (paying attention to employees' feelings and salary benefits) can relieve nurses' job burnout to some  
40  
41  
42  
43  
44  
45  
46  
47  
48  
49  
50  
51  
52  
53  
54  
55  
56  
57  
58  
59  
60

1  
2  
3 extent and then improve their satisfaction with various systems and policies of the organization. As a  
4  
5  
6 reward for the organization, employees will also enhance their commitment and loyalty to the  
7  
8 organization and will improve their efforts to work. To improve the job satisfaction of nurses, it is  
9  
10 suggested that hospital managers provide organizational support for nurses from the following three  
11  
12 aspects: first, strengthen communication, understand the needs of nurses, and take targeted  
13  
14 organizational support measures so that nurses can really appreciate the hospitals' support; second, pay  
15  
16 attention to the work of nurses, provide necessary work resources and condition support for them, pay  
17  
18 attention to the problems faced by nurses and try their best to provide help to alleviate nurses'  
19  
20 emotional exhaustion and reduce the degree of depersonalization; and finally, pay attention to the  
21  
22 welfare of nurses, implement reasonable salaries and performance incentive system, pay attention to  
23  
24 the interests of nurses in decision-making, and at the same time, pay attention to the professional  
25  
26 development of nurses, and provide more development platforms for nurses so that they can find their  
27  
28 own value and personal accomplishment in the process of career development.  
29  
30  
31  
32  
33  
34

35 Previous studies have mentioned a series of influencing factors regarding turnover intention in  
36  
37 other countries or areas.<sup>22-25</sup> According to linear regression analysis, Block 1 showed that professional  
38  
39 qualifications and employment form are two important demographic variables that affect nurses'  
40  
41 turnover intention, which is different from the findings of Almalki *et al.*'s study.<sup>62</sup> The results of single  
42  
43 factor analysis indicated that nurses with lower-level professional qualifications had a higher turnover  
44  
45 intention, and full-time employed nurses had a lower turnover intention than temporarily employed  
46  
47 nurses. This may be attributed to nurses with low professional qualifications being generally in  
48  
49 first-line clinical work, facing a heavy workload and finding it difficult to cope with the patients or  
50  
51 their relatives. They are confronted with an imbalance between pay and return, as well as social  
52  
53  
54  
55  
56  
57  
58  
59  
60

1  
2  
3  
4  
5  
6  
7  
8  
9  
10  
11  
12  
13  
14  
15  
16  
17  
18  
19  
20  
21  
22  
23  
24  
25  
26  
27  
28  
29  
30  
31  
32  
33  
34  
35  
36  
37  
38  
39  
40  
41  
42  
43  
44  
45  
46  
47  
48  
49  
50  
51  
52  
53  
54  
55  
56  
57  
58  
59  
60

ignorance of their role, which affects their work enthusiasm, and thereby increasing the possibility of leaving. In addition, the temporarily employed nurses' income is unstable and these nurses do not have a strong sense of belonging to the hospital, so a turnover intention possibility is stronger.

In the linear regression analysis, Block 2 showed that workplace violence has a significant effect on turnover intention, which was consistent with earlier findings.<sup>31-35</sup> Workplace violence is a particularly shocking event within our model. Workplace violence can provoke in nurses a sense of extreme insecurity and reduced self-value which may directly lead to turnover intention. SEM also stated clearly that perceived organizational support played a moderating role in the impact of workplace violence on turnover intention. Workplace violence not only causes physical and psychological harm to nurses but also aggravates nurses' stress and reluctance to work,<sup>17</sup> resulting in an increase in turnover intention. Hospitals can carry out a variety of amateur activities to reduce the work stress of nurses. The hospital can also set up a psychological decompression room, regularly conduct psychological counseling for nurses through a psychologist, and conduct emotional management well.<sup>17</sup> In brief, the more comprehensive the support provided by the organization, the less likely the nurses are to have bad emotions. Moreover, hospitals can provide diverse emotional support for nurses who have experienced different types of workplace violence so that they feel the concern of the hospital, reduce the harm to nurses.

Synthesizing the results of the linear regression analysis and SEM showed that perceived organizational support had a negative influence on turnover intention, that is, the higher the sense of organizational support, the lower the turnover intention. Organizational support explained 13% of the overall variance in turnover intention regarding the results of the linear regression. The results of the SEM also showed that organizational support has a direct or indirect effect on turnover intention. These



1  
2  
3  
4 results suggested that organizational support makes the greatest contribution to the model of turnover  
5  
6 intention. The psychological mechanism embodied in the perceived organizational support is the social  
7  
8 exchange between employees and organizations.<sup>63</sup> From the view of social exchange, the exchange  
9  
10 consciousness of employees concerning perceived organizational support depends entirely on the level  
11  
12 of that organizational support. The fundamental reason employees are willing to stay in an organization  
13  
14 is that they feel the contributions of employees to the organization are equal or fair in respect of what  
15  
16 they receive in return from the relevant organization. As knowledge workers, nurses generally have  
17  
18 higher achievement motivation, because they hope to achieve and get social recognition value. When a  
19  
20 nurse thinks that hospitals and departments must pay attention to his or her contributions and are  
21  
22 concerned about their personal interests and occupation development, this will reduce turnover  
23  
24 intention and will lead to a higher organizational commitment and work ability. After workplace  
25  
26 violence has occurred, hospitals need to provide care and support to nurses as far as possible to reduce  
27  
28 the harm of violence inflicted on them, which, in turn, is likely to increase their emotional commitment  
29  
30 to the hospital, and reduce the possibility of leaving. Therefore, the hospital should provide active  
31  
32 support measures, including: giving respect, welfare support, and practical support; effectively  
33  
34 conveying the support of upper management; ensuring a relationship of trust and support between  
35  
36 employees and their immediate supervisors; emphasizing procedural justice in the organization; and  
37  
38 creating a supportive organizational climate.<sup>20</sup> These measures are likely to encourage nurses to stay in  
39  
40 their present position and improve their job satisfaction, thus reducing their turnover rate.<sup>37 43</sup>

41  
42 The results of linear regression analysis also demonstrated that emotional exhaustion and  
43  
44 depersonalization had a positive significant influence on turnover intention, and they explained 9% of  
45  
46 the overall variance in turnover intention. In short, our findings showed that job burnout is positively  
47  
48  
49

1  
2  
3 related to turnover intention, which is similar to previous results.<sup>23 29 31 40</sup> At present, there are various  
4  
5 theories and models (for example, the conservation of resources theory,<sup>64</sup> the job demand-resource  
6  
7 model,<sup>65</sup> and the effort-reward imbalance model<sup>66</sup>) which have been used to explain burnout. One  
8  
9 aspect in common arising from these theories involves an employee's experiencing a sense of  
10  
11 inconsistency in relation to what the job promises and what it delivers, which leads to job burnout.  
12  
13  
14  
15 Clinical nurses often undertake overloaded work, and especially young nurses who have just started  
16  
17 work, have relatively insufficient clinical technical ability and effective communication skills. When  
18  
19 their behavior is different from the expectations of doctors/administrators/patients, the doctor/  
20  
21 manager's criticism and patient's dissatisfaction will reduce their work enthusiasm and easily lead to  
22  
23 emotional exhaustion, and causing turnover intention.  
24  
25  
26

27  
28 Another noteworthy result of our study was that job satisfaction was found to be negatively related  
29  
30 to turnover intention in the SEM, similar to previous results.<sup>9 11 24 26</sup> Therefore, hospitals should pay  
31  
32 greater attention to the working conditions and health status of nurses and increase their job satisfaction  
33  
34 and sense of organizational belonging to reduce their job burnout and turnover intention. A Pearson  
35  
36 correlation analysis also showed that workplace violence was positively related to job burnout. Nurses  
37  
38 often face shocking events, for example, workplace violence and organizational injustice, during their  
39  
40 work, and negative attitudes, for example patient mistrust, which fosters job burnout, affecting their  
41  
42 work enthusiasm and work quality, and increasing the possibility of leaving.<sup>57-59</sup>  
43  
44  
45  
46

47  
48 The present study has several limitations. First, researchers collected data concerning whether  
49  
50 nurses had experienced workplace violence in the last 12 months, so there may be recall bias in the  
51  
52 results. Second, it was not known whether those returning incomplete questionnaires differed in any  
53  
54 significant way from those who completed them. Third, purposive sampling results are greatly  
55  
56  
57  
58  
59  
60

1  
2  
3 influenced due to the preconceptions of researchers. To the extent that subjective judgment may be  
4  
5  
6 biased, this can readily lead to sampling bias and cannot provide complete confidence in the results of  
7  
8  
9 the overall investigation. Thus, the researchers involved clearly understand the basic characteristics of  
10  
11 the population under investigation, so that the selected samples can be representative and typical.  
12  
13  
14

## 15 **CONCLUSIONS**

16  
17  
18 Perceived organizational support served as a moderator between workplace violence, job satisfaction,  
19  
20  
21 burnout and turnover intention, and it has a significant negative impact on turnover intention. Therefore,  
22  
23  
24 nursing managers should understand the organization's support and establish a reasonable incentive  
25  
26  
27 system to decrease turnover intention.  
28

## 29 **Acknowledgments**

30  
31  
32 The authors thank all the nurses, managers and Chinese Hospital Association for their assistance and  
33  
34  
35 support for this project.  
36  
37

## 38 **Author Contributions**

39  
40  
41 LF, TS and XN designed the study. WL, LS, ZZ, XL, XJ, and LL collected data. WL, SZ, LS, XD, GL,  
42  
43  
44 LL and FL analysed the data. WL, SZ and LS drafted the manuscript. WL, LF, TS and XN revised the  
45  
46  
47 manuscript.  
48

## 49 **Funding**

50  
51 This study was funded by the National Natural Science Foundation of China (NSFC), grant number  
52  
53  
54 71473063.  
55

56  
57 **Competing interests** None declared.  
58

**Data sharing statement** No additional data are available.

## REFERENCES

1. Nardi DA, Gyurko CC. The Global Nursing Faculty Shortage: Status and Solutions for Change. *J Nurs Scholarship* 2013;45(3):317-26.
2. Sermeus W, Bruyneel L. Investing in Europe's health workforce of tomorrow: Scope for innovation and collaboration. Summary report of the three Policy Dialogues. European Observatory on Health Systems and Policies. *Effect of Growth Rate of Load on Strain Aging of Soft Soil in Marsh* 2010;1995-2001.
3. Auerbach D, Buerhaus P D. Better late than never: workforce supply implications of later entry into nursing. *Health Affairs* 2007;26(1):178-185.
4. National Health and Family Planning Commission of the People's Republic of China. National nursing development program (2016-2020). [internet] <http://www.nhfpc.gov.cn/yzygj/s3593/201611/92b2e8f8cc644a899e9d0fd572aefef3.Shtml>.
5. Xiaoyan W. Analysis of the situation of nursing human resources in public hospitals. *The World Clinical Medicine* 2016;10(4):247-248.
6. You LM, Ke YY, Zheng J, *et al*. The development and issues of nursing education in China: a national data analysis. *Nurse Educ Today* 2015;35(2):310-314.
7. Janiszewski GH. The nursing shortage in the United States of America: an integrative review of the literature. *J Adv Nurs* 2003;43(4):335-350.
8. Anderson DJ, Chan E, Dresner P, *et al*. Nursing and Midwifery Services Strategic Directions, 2011-2015. *World Health Organization* 2010.

- 1  
2  
3  
4 9. Chao MC, Jou RC, Liao CC, *et al.* Workplace stress, job satisfaction, job performance, and  
5  
6 turnover intention of health care workers in rural Taiwan. *Asia Pac J Public Health* 2015;  
7  
8 27:NP1827-NP1836.  
9
- 10  
11 10. March JG, Simon HA. *Organizations*. New York: Wiley, 1958.
- 12  
13 11. Mobley WH, Griffeth RW, Hand HH, *et al.* Review and conceptual analysis of the employee  
14  
15 turnover process. *Psychol Bull* 1979;86:493-522.
- 16  
17 12. Bluedorn AC. A unified model of turnover from organizations. *Human Relations* 1982;35:135-  
18  
19 53.
- 20  
21 13. Sheridan JE, Abelson MA. Cusp catastrophe model of employee turnover. *Academy of*  
22  
23 *Management Journal* 1983;26:418-36.
- 24  
25 14. Lee TW, Mitchell TR. An alternative approach: the unfolding model of voluntary employee  
26  
27 turnover. *Academy of Management Review* 1994;1:51-89.
- 28  
29 15. Price JL. The development of a causal model of voluntary turnover. *Iowa State University Press:*  
30  
31 *Ames* 2000.
- 32  
33 16. Griffeth RW, Hom PW, Gaertner S. A meta-analysis of antecedents and correlates of employee  
34  
35 turnover: update, moderator tests, and research implications for the next millennium. *Journal of*  
36  
37 *Management* 2000;26(3):463-488.
- 38  
39 17. Shi L, Zhang D, Zhou C, *et al.* A cross-sectional study on the prevalence and associated risk  
40  
41 factors for workplace violence against Chinese nurses. *BMJ open* 2017;7(6):e013105.
- 42  
43 18. Utriainen K, Kyngäs H. Hospital nurses' job satisfaction: a literature review. *J Nurs Manag*  
44  
45 2009;17:1002-1010.
- 46  
47 19. Maslach C, Jackson SE. The measurement of experienced burnout. *Journal of Organizational*  
48  
49  
50  
51  
52  
53  
54  
55  
56

- 1  
2  
3  
4  
5  
6  
7  
8  
9  
10  
11  
12  
13  
14  
15  
16  
17  
18  
19  
20  
21  
22  
23  
24  
25  
26  
27  
28  
29  
30  
31  
32  
33  
34  
35  
36  
37  
38  
39  
40  
41  
42  
43  
44  
45  
46  
47  
48  
49  
50  
51  
52  
53  
54  
55  
56  
57  
58  
59  
60
- Behavior* 1981;2(2):99-113.
20. Rhoades L, Eisenberger R. Perceived organizational support: A review of the literature. *Journal of Applied Psychology* 2002;87(4):698-714.
21. Kim JK, Kim MJ. A Review of Research on Hospital Nurses' Turnover Intention. *Journal of Korean Academy of Nursing Administration* 2011;17(4):538.
22. Ramoo V, Abdullah KL, Piaw CY. The relationship between job satisfaction and intention to leave current employment among registered nurses in a teaching hospital. *J Clin Nurs* 2013; 22(21-22):3141-3152.
23. Yoon GS, Kim SY. Influences of Job Stress and Burnout on Turnover Intention of Nurses. *J Korean Acad Nurs Admin* 2010;16(4):507-516.
24. Coomber B, Barriball KL. Impact of job satisfaction components on intent to leave and turnover for hospital-based nurses: A review of the research literature. *Int J Nurs Stud* 2007;44(2):297-314.
25. Aiken LH, Sermeus W, Van den Heede K, *et al.* Patient safety, satisfaction, and quality of hospital care: cross sectional surveys of nurses and patients in 12 countries in Europe and the United States. *BMJ* 2012;344:e1717.
26. Li L, Hu H, Zhou H, *et al.* Work stress, work motivation and their effects on job satisfaction in community health workers: a cross-sectional survey in China. *BMJ Open* 2014;4(6):e004897.
27. Choi SH, Lee H. Workplace violence against nurses in Korea and its impact on professional quality of life and turnover intention. *J Nurs Manage* 2017;1-11.
28. Labrague LJ, Mcentro cc Etitte DM, Gloe D, *et al.* Organizational politics, nurses' stress, burnout levels, turnover intention and job satisfaction. *Int Nurs Rev* 2017;64(1):109.
29. Oyeleye O, Hanson P, O'Connor N, *et al.* Relationship of workplace incivility, stress, and

- 1  
2  
3 burnout on nurses' turnover intentions and psychological empowerment. *J Nurs Admin* 2013;  
4  
5  
6 43(10):536-542.  
7
- 8 30. Seo, Min S, Kim, *et al.* Effect of Workplace Bullying, Job Satisfaction and Self-Esteem on  
9  
10 Turnover Intention in Clinical Nurses. *Journal of the Korean Society for Wellness*  
11  
12 2017;12(2):105-115.  
13  
14
- 15 31. Mcdowell SS. Client-Inflicted Workplace Violence, Burnout, Job Satisfaction, and Turnover  
16  
17 Intention: A Comparative Analysis Between Institution-Based and Home-Based Direct Care  
18  
19 Paraprofessionals. *Dissertations & Theses - Gradworks* 2015;208.  
20  
21  
22
- 23 32. Olsen E, Bjaalid G, Mikkelsen A. Work climate and the mediating role of workplace bullying  
24  
25 related to job performance, job satisfaction, and work ability: A study among hospital nurses. *J*  
26  
27 *Adv Nurs* 2017.  
28  
29
- 30 33. Tarja H, Anne K, Marianna V, *et al.* The prospective effects of workplace violence on physicians'  
31  
32 job satisfaction and turnover intentions: the buffering effect of job control. *BMC Health Serv*  
33  
34 *Res* 2014;14(1):1-8.  
35  
36  
37
- 38 34. Christensen MP. Relationships between workplace violence, burnout, and intent to leave in  
39  
40 emergency department nurses. *Dissertations & Theses-Gradworks* 2014;21(21):984-90.  
41  
42
- 43 35. Kim JI, Kim TS. Violence episodes and turnover among clinical nurses. *Journal of Korean*  
44  
45 *Academy of Nursing Administration* 2004;10(4):427-436.  
46  
47
- 48 36. Tnay E, Othman AEA, Siong HC, *et al.* The Influences of Job Satisfaction and Organizational  
49  
50 Commitment on Turnover Intention. *Procedia Social and Behavioral Sciences* 2013;97(2):201-  
51  
52 208.  
53  
54
- 55 37. Islam T, Latif I, Ali G. The relationship between perceived organizational support and turnover  
56  
57

- intention: mediating role of affective commitment and job satisfaction. *Research Journal of Applied Sciences Engineering & Technology* 2014;8(24):2422-2425.
38. Samad S, Yasmin S, Yusuf M. The Role of Organizational Commitment in Mediating the Relationship between Job Satisfaction and Turnover Intention. *European Journal of Social Sciences* 2012;30(2):135-137.
39. Yücel I. Examining the Relationships among Job Satisfaction, Organizational Commitment, and Turnover Intention: An Empirical Study. *International Journal of Business & Management* 2012;7(20):1-15.
40. Shimizu T, Feng Q, Nagata S. Relationship between turnover and burnout among Japanese hospital nurses. *J Occup Health* 2005;47(4):334.
41. Abou Hashish E A. Relationship between ethical work climate and nurses' perception of organizational support, commitment, job satisfaction and turnover intent. *Nurs Ethics* 2015;1-16.
42. Dawley D, Houghton JD, Bucklew NS. Perceived organizational support and turnover intention: the mediating effects of personal sacrifice and job fit. *Journal of Social Psychology* 2010;150(3):238-257.
43. Tumwesigye G. The relationship between perceived organizational support and turnover intentions in a developing country: The mediating role of organizational commitment. *African Journal of Business Management* 2010;4(6):942-952.
44. Zhang Y, Wu J, Fang Z, *et al.* Newly graduated nurses' intention to leave in their first year of practice in Shanghai: A longitudinal study. *Nurs Outlook* 2017;65(2):202-209.



- 1  
2  
3  
4 45. Sun FF, Xu CP. Job stress and its relationship with quality of life and turnover intention of ICU  
5  
6 nurses in general hospital. *Shandong University* 2016.  
7  
8  
9 46. Lei W, Hong S, Xin G, *et al.* Correlation research between nurses' status of career planning and  
10  
11 job satisfaction, turnover intention. *Chin J Mod Nurs* 2015;21(31):3721-3723.  
12  
13 47. Zhang HF, Liu YH, Yang Y, *et al.* The influencing factors of nurses' turnover tendency. *Chinese*  
14  
15 *Journal of Nursing* 2015;50(2):155-160.  
16  
17  
18 48. Hongmei YI, Lanxian YU, Tang J, *et al.* Relationship between psychological capital, work  
19  
20 engagement and turnover intention among primary nurses in Traditional Chinese Medicine  
21  
22 hospitals. *Chinese Nursing Management* 2015.  
23  
24  
25 49. Li L, Ai H, Gao L, *et al.* Moderating effects of coping on work stress and job performance for  
26  
27 nurses in tertiary hospitals: a cross-sectional survey in China. *BMC Health Serv Res* 2017;  
28  
29 17(1):401.  
30  
31  
32  
33 50. ILO/ICN/WHO/PSI. Framework Guidelines for Addressing Workplace Violence in the Health  
34  
35 Sector. Geneva: ILO/ICN/WHO/PSI Joint Programme on Workplace Violence in the Health  
36  
37 Sector; 2002.  
38  
39  
40 51. Richardsen AM, Martinussen M. Factorial validity and consistency of the MBI-GS across  
41  
42 occupational groups in Norway. *International Journal of Stress Management* 2005;  
43  
44 12(3):289-297.  
45  
46  
47 52. Lin Y, Jing-Xiang MA, Chen WQ, *et al.* Relationship between Perception of Job Characteristics  
48  
49 and Job Satisfaction of Pediatric Nurses. *Journal of Nursing* 2013.  
50  
51  
52 53. Chen ZX, Aryee S, Lee C. Test of a mediation model of perceived organizational support.  
53  
54  
55 *Journal of Vocational Behavior* 2005;66(3):457-470.  
56  
57

- 1  
2  
3  
4 54. Lee G, Lee D. A study on the relationships among role conflict, organizational commitment and  
5  
6 intent to quit matrix organizational structure: using employees from industrial technology  
7  
8 research institute as example. *Graduate School of management, National Chiao Tung*  
9  
10 *University* 2000.  
11  
12  
13 55. Li YX, Zhang K, Zhao GX. Confirmatory factor analysis of job burnout. *Psychological*  
14  
15 *Exploration (in China)* 2005;4:70-74.  
16  
17  
18 56. Li CP, Shi K. The influence of distributive justice and procedural justice on Job Burnout. *Acta*  
19  
20 *Psychologica Sinica* 2003;35(5):677-684.  
21  
22  
23 57. Hirschfeld RR. Does Revising the Intrinsic and Extrinsic Subscales of the Minnesota Satisfaction  
24  
25 Questionnaire Short Form Make a Difference? *Educational & Psychological Measurement*  
26  
27 2000;60(60):255-270.  
28  
29  
30 58. Tiruneh BT, Biftu BB, Tumebo AA, *et al.* Prevalence of workplace violence in Northwest  
31  
32 Ethiopia: a multivariate analysis. *BMC Nurs* 2016;15:1-6.  
33  
34  
35 59. Franz S, Zeh A, Schablon A, *et al.* Aggression and violence against health care workers in  
36  
37 Germany-a cross sectional retrospective survey. *BMC Health Serv Res* 2010;10:51.  
38  
39  
40 60. Arnetz J, Hamblin L, Ager J, *et al.* Using the Hazard Risk Matrix to identify hospital  
41  
42 workplaces at risk for violence. *Apha Meeting and Exposition* 2014;1276-1284.  
43  
44  
45 61. Gu St, Huang QM, Chen ZHQ, *et al.* Relationship between job satisfaction and turnover  
46  
47 intention among physicians from three grade hospitals. *Chinese Journal of Hospital*  
48  
49 *Administration* 2006;9:586-589.  
50  
51  
52 62. Almalki MJ, Gerry FG, Michele C. The relationship between quality of work life and turnover  
53  
54 intention of primary health care nurses in Saudi Arabia. *BMC Health Serv Res* 2012;12(1):314.  
55  
56

- 1  
2  
3  
4 63. Settoon RP, Bennett N, Liden RC. Social exchange in organizations: Perceived organizational  
5  
6 support, leader-member exchange, and employee reciprocity. *Social Science Electronic*  
7  
8 *Publishing* 2014;81(3):219-227.  
9  
10  
11 64. Hobfoll SE. The influence of culture, community, and the nested-self in the stress process:  
12  
13 Advancing Conservation of Resources theory. *Applied Psychology* 2001; 50(3):337-421.  
14  
15  
16 65. Yom YH. Analysis of burnout and job satisfaction among nurses based on the Job  
17  
18 Demand-Resource Model. *J Koren Acad Nurs* 2013;43(1):114-122.  
19  
20  
21 66. Siegrist J, Starke D, Chandola T, *et al.* The measurement of effort-reward imbalance at work:  
22  
23 European comparisons. *Soc Sci Med* 2004;58(8):1483-1499.  
24  
25  
26  
27

28 **FIGURE LEGEND: Figure 1. The final model in this study. (CFI = 0.956, GFI = 0.924, IFI =**  
29 **0.942, NFI=0.931, RMR = 0.050, RMSEA = 0.053, TLI = 0.926)**

30  
31 Note: CFI, comparative fit index; GFI, goodness of fit index; IFI, incremental fit index; NFI, normed  
32  
33 fit index; RMR, root mean square residual; RMSEA, root mean square error of approximation; TLI,  
34  
35 Tucker–Lewis incremental fit.  
36  
37  
38  
39  
40  
41  
42  
43  
44  
45  
46  
47  
48  
49  
50  
51  
52  
53  
54  
55  
56  
57  
58  
59  
60

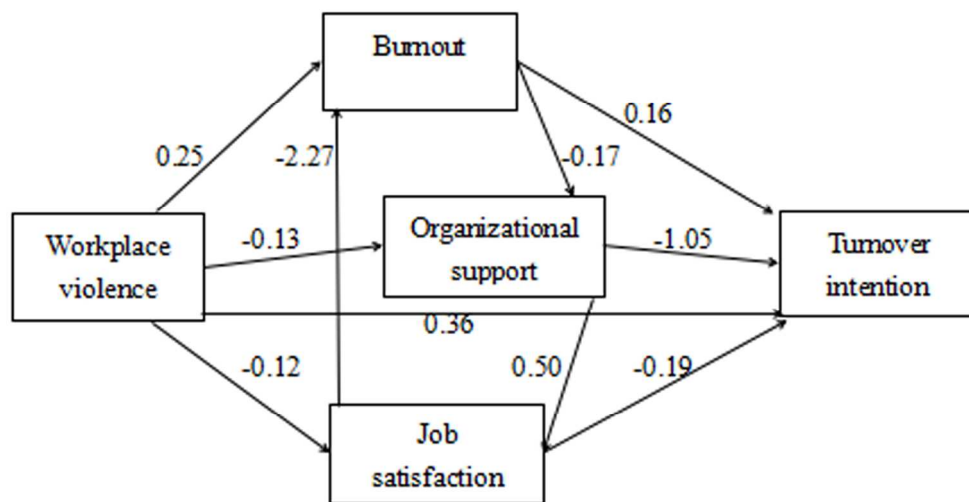

Figure 1. The final model in this study. (CFI = 0.956, GFI = 0.924, IFI = 0.942, NFI=0.931, RMR = 0,050, RMSEA = 0.053, TLI = 0.926)

Note: CFI, comparative fit index; GFI, goodness of fit index; IFI, incremental fit index; NFI, normed fit index; RMR, root mean square residual; RMSEA, root mean square error of approximation; TLI, Tucker-Lewis incremental fit.

117x61mm (300 x 300 DPI)

STROBE 2007 (v4) Statement—Checklist of items that should be included in reports of *cross-sectional studies*

| Section/Topic                | Item # | Recommendation                                                                                                                                                                       | Reported on page #          |
|------------------------------|--------|--------------------------------------------------------------------------------------------------------------------------------------------------------------------------------------|-----------------------------|
| Title and abstract           | 1      | (a) Indicate the study's design with a commonly used term in the title or the abstract                                                                                               | Page 3, line 4-9            |
|                              |        | (b) Provide in the abstract an informative and balanced summary of what was done and what was found                                                                                  | p.4, line 4-18              |
| <b>Introduction</b>          |        |                                                                                                                                                                                      |                             |
| Background/rationale         | 2      | Explain the scientific background and rationale for the investigation being reported                                                                                                 | P. 5; p. 6; p. 7, line 4-49 |
| Objectives                   | 3      | State specific objectives, including any prespecified hypotheses                                                                                                                     | P. 8, line15-33             |
| <b>Methods</b>               |        |                                                                                                                                                                                      |                             |
| Study design                 | 4      | Present key elements of study design early in the paper                                                                                                                              | P. 8, line38-55;            |
| Setting                      | 5      | Describe the setting, locations, and relevant dates, including periods of recruitment, exposure, follow-up, and data collection                                                      | P. 9, line 21-48            |
| Participants                 | 6      | (a) Give the eligibility criteria, and the sources and methods of selection of participants                                                                                          | p.8, 40-56                  |
| Variables                    | 7      | Clearly define all outcomes, exposures, predictors, potential confounders, and effect modifiers. Give diagnostic criteria, if applicable                                             | P. 10, line 4-21            |
| Data sources/<br>measurement | 8*     | For each variable of interest, give sources of data and details of methods of assessment (measurement). Describe comparability of assessment methods if there is more than one group | P. 10; p.11; p.12           |

1  
2  
3  
4  
5  
6  
7  
8  
9  
10  
11  
12  
13  
14  
15  
16  
17  
18  
19  
20  
21  
22  
23  
24  
25  
26  
27  
28  
29  
30  
31  
32  
33  
34  
35  
36  
37  
38  
39  
40  
41  
42  
43  
44  
45  
46  
47

|                        |     |                                                                                                                                                                                                   |                                      |
|------------------------|-----|---------------------------------------------------------------------------------------------------------------------------------------------------------------------------------------------------|--------------------------------------|
| Bias                   | 9   | Describe any efforts to address potential sources of bias                                                                                                                                         | P.13, line13-18                      |
| Study size             | 10  | Explain how the study size was arrived at                                                                                                                                                         | P. 9, line 48-56                     |
| Quantitative variables | 11  | Explain how quantitative variables were handled in the analyses. If applicable, describe which groupings were chosen and why                                                                      | p. 13, line24-26                     |
| Statistical methods    | 12  | (a) Describe all statistical methods, including those used to control for confounding                                                                                                             | P. 13, line13-55                     |
|                        |     | (b) Describe any methods used to examine subgroups and interactions                                                                                                                               | P. 13, line 16-19                    |
|                        |     | (c) Explain how missing data were addressed                                                                                                                                                       | P. 13, line 19-35                    |
|                        |     | (d) If applicable, describe analytical methods taking account of sampling strategy                                                                                                                | P. 13, line 4-16                     |
|                        |     | (e) Describe any sensitivity analyses                                                                                                                                                             | P. 13, line 36-40                    |
| <b>Results</b>         |     |                                                                                                                                                                                                   |                                      |
| Participants           | 13* | (a) Report numbers of individuals at each stage of study—eg numbers potentially eligible, examined for eligibility, confirmed eligible, included in the study, completing follow-up, and analysed | P. 9,line 22-48;                     |
|                        |     | (b) Give reasons for non-participation at each stage                                                                                                                                              | P. 9, line 39-48                     |
|                        |     | (c) Consider use of a flow diagram                                                                                                                                                                | No                                   |
| Descriptive data       | 14* | (a) Give characteristics of study participants (eg demographic, clinical, social) and information on exposures and potential confounders                                                          | P. 14,line 37-57;<br>P. 15,line 2-36 |
|                        |     | (b) Indicate number of participants with missing data for each variable of interest                                                                                                               | P.9, line 36                         |
| Outcome data           | 15* | Report numbers of outcome events or summary measures                                                                                                                                              | P. 15; P. 16; P. 17;<br>P. 18;P. 19  |

|                                                                      |                          |    |                                                                                                                                                                                                              |                                                       |
|----------------------------------------------------------------------|--------------------------|----|--------------------------------------------------------------------------------------------------------------------------------------------------------------------------------------------------------------|-------------------------------------------------------|
| 1<br>2<br>3<br>4<br>5<br>6<br>7                                      | Main results             | 16 | (a) Give unadjusted estimates and, if applicable, confounder-adjusted estimates and their precision (eg, 95% confidence interval). Make clear which confounders were adjusted for and why they were included | P. 17, ;P. 18                                         |
| 8<br>9                                                               |                          |    | (b) Report category boundaries when continuous variables were categorized                                                                                                                                    | P. 15, line 2-35                                      |
| 10<br>11                                                             |                          |    | (c) If relevant, consider translating estimates of relative risk into absolute risk for a meaningful time period                                                                                             | P. 19, p.21                                           |
| 12<br>13<br>14<br>15                                                 | Other analyses           | 17 | Report other analyses done—eg analyses of subgroups and interactions, and sensitivity analyses                                                                                                               | P. 20, line 4-27;                                     |
| 16<br>17                                                             | <b>Discussion</b>        |    |                                                                                                                                                                                                              |                                                       |
| 18<br>19<br>20<br>21                                                 | Key results              | 18 | Summarise key results with reference to study objectives                                                                                                                                                     | P. 21; p. 22;<br>P. 23; p24; p25                      |
| 22<br>23<br>24                                                       | Limitations              | 19 | Discuss limitations of the study, taking into account sources of potential bias or imprecision. Discuss both direction and magnitude of any potential bias                                                   | P. 26, Line 36-53                                     |
| 25<br>26<br>27<br>28<br>29                                           | Interpretation           | 20 | Give a cautious overall interpretation of results considering objectives, limitations, multiplicity of analyses, results from similar studies, and other relevant evidence                                   | P. 19, line 33-57;<br>p.21; p. 22;<br>P. 24, line4-22 |
| 30<br>31<br>32<br>33                                                 | Generalisability         | 21 | Discuss the generalisability (external validity) of the study results                                                                                                                                        | P. 23, line 29-42;<br>P. 25, line 3-57;               |
| 34<br>35                                                             | <b>Other information</b> |    |                                                                                                                                                                                                              |                                                       |
| 36<br>37<br>38<br>39<br>40<br>41<br>42<br>43<br>44<br>45<br>46<br>47 | Funding                  | 22 | Give the source of funding and the role of the funders for the present study and, if applicable, for the original study on which the present article is based                                                | P. 27, line 40-45                                     |

1  
2  
3  
4  
5  
6  
7  
8  
9  
10  
11  
12  
13  
14  
15  
16  
17  
18  
19  
20  
21  
22  
23  
24  
25  
26  
27  
28  
29  
30  
31  
32  
33  
34  
35  
36  
37  
38  
39  
40  
41  
42  
43  
44  
45  
46  
47

\*Give information separately for cases and controls in case-control studies and, if applicable, for exposed and unexposed groups in cohort and cross-sectional studies.

**Note:** An Explanation and Elaboration article discusses each checklist item and gives methodological background and published examples of transparent reporting. The STROBE checklist is best used in conjunction with this article (freely available on the Web sites of PLoS Medicine at <http://www.plosmedicine.org/>, Annals of Internal Medicine at <http://www.annals.org/>, and Epidemiology at <http://www.epidem.com/>). Information on the STROBE Initiative is available at [www.strobe-statement.org](http://www.strobe-statement.org).

For peer review only



# BMJ Open

## Workplace violence, job satisfaction, burnout, perceived organizational support and their effects on turnover intention among Chinese nurses in tertiary hospitals: a cross-sectional study

|                                 |                                                                                                                                                                                                                                                                                                                                                                                                                                                                                                                                                                                                                                                                                                                                                                                                                                                                                                                                                                                                                                                                                                                                                                                                                                                                                                                                                                                                                                                 |
|---------------------------------|-------------------------------------------------------------------------------------------------------------------------------------------------------------------------------------------------------------------------------------------------------------------------------------------------------------------------------------------------------------------------------------------------------------------------------------------------------------------------------------------------------------------------------------------------------------------------------------------------------------------------------------------------------------------------------------------------------------------------------------------------------------------------------------------------------------------------------------------------------------------------------------------------------------------------------------------------------------------------------------------------------------------------------------------------------------------------------------------------------------------------------------------------------------------------------------------------------------------------------------------------------------------------------------------------------------------------------------------------------------------------------------------------------------------------------------------------|
| Journal:                        | <i>BMJ Open</i>                                                                                                                                                                                                                                                                                                                                                                                                                                                                                                                                                                                                                                                                                                                                                                                                                                                                                                                                                                                                                                                                                                                                                                                                                                                                                                                                                                                                                                 |
| Manuscript ID                   | bmjopen-2017-019525.R3                                                                                                                                                                                                                                                                                                                                                                                                                                                                                                                                                                                                                                                                                                                                                                                                                                                                                                                                                                                                                                                                                                                                                                                                                                                                                                                                                                                                                          |
| Article Type:                   | Research                                                                                                                                                                                                                                                                                                                                                                                                                                                                                                                                                                                                                                                                                                                                                                                                                                                                                                                                                                                                                                                                                                                                                                                                                                                                                                                                                                                                                                        |
| Date Submitted by the Author:   | 13-Mar-2018                                                                                                                                                                                                                                                                                                                                                                                                                                                                                                                                                                                                                                                                                                                                                                                                                                                                                                                                                                                                                                                                                                                                                                                                                                                                                                                                                                                                                                     |
| Complete List of Authors:       | Liu, Wenhui; Harbin Medical University School of Public Health, Department of Health Management<br>Zhao, Shihong; The Second Affiliated Hospital of Harbin Medical University, Department of Neurosurgery<br>Shi, Lei; School of Public Health, Harbin Medical University, Department of Health Management<br>Zhang, Zhong; School of Public Health, Harbin Medical University, Department of Medical Education<br>Liu, Xinyan; Harbin Medical University, Department of Medical Education, School of Public Health<br>Li, Li; School of Public Health, Harbin Medical University, Department of Health Management<br>Duan, Xiaojian; School of Public Health, Harbin Medical University, Department of Health Management<br>Li, Guoqiang; Harbin Medical University, Department of Health Management, School of Public Health<br>Lou, Fengge; School of Public Health, Qiqihar Medical University, Department of Public Health Research<br>Jia, Xiaoli; Chinese Hospital Association, Department of Autonomous Protection<br>Fan, Lihua; Harbin Medical University, Department of Health Management, School of Public Health; School of Public Health, Harbin Medical University, Department of Medical Education<br>Sun, Tao; Harbin Medical University School of Public Health,<br>Ni, Xin; National Center for Children's Health, Beijing Children's Hospital affiliated to Capital Medical University, Department of the Hospital Director |
| <b>Primary Subject Heading</b>: | Health policy                                                                                                                                                                                                                                                                                                                                                                                                                                                                                                                                                                                                                                                                                                                                                                                                                                                                                                                                                                                                                                                                                                                                                                                                                                                                                                                                                                                                                                   |
| Secondary Subject Heading:      | Health policy, Health services research, Nursing, Medical management                                                                                                                                                                                                                                                                                                                                                                                                                                                                                                                                                                                                                                                                                                                                                                                                                                                                                                                                                                                                                                                                                                                                                                                                                                                                                                                                                                            |
| Keywords:                       | Workplace violence, job satisfaction, burnout, organizational support, turnover intention, nurses                                                                                                                                                                                                                                                                                                                                                                                                                                                                                                                                                                                                                                                                                                                                                                                                                                                                                                                                                                                                                                                                                                                                                                                                                                                                                                                                               |
|                                 |                                                                                                                                                                                                                                                                                                                                                                                                                                                                                                                                                                                                                                                                                                                                                                                                                                                                                                                                                                                                                                                                                                                                                                                                                                                                                                                                                                                                                                                 |

1  
2  
3  
4  
5  
6  
7  
8  
9  
10  
11  
12  
13  
14  
15  
16  
17  
18  
19  
20  
21  
22  
23  
24  
25  
26  
27  
28  
29  
30  
31  
32  
33  
34  
35  
36  
37  
38  
39  
40  
41  
42  
43  
44  
45  
46  
47  
48  
49  
50  
51  
52  
53  
54  
55  
56  
57  
58  
59  
60

SCHOLARONE™  
Manuscripts

For peer review only

1  
2  
3  
4 **Workplace violence, job satisfaction, burnout, perceived organizational support and**  
5  
6 **their effects on turnover intention among Chinese nurses in tertiary hospitals: a**  
7  
8 **cross-sectional study**  
9

10  
11  
12  
13 Wenhui Liu,<sup>1\*</sup> Shihong Zhao,<sup>1,2\*</sup> Lei Shi,<sup>1\*</sup> Zhong Zhang,<sup>3</sup> Xinyan Liu,<sup>3</sup> Li Li,<sup>1</sup> Xiaojian Duan,<sup>1</sup>

14  
15  
16 Guoqiang Li,<sup>1</sup> Fengge Lou,<sup>4</sup> Xiaoli Jia,<sup>5</sup> Lihua Fan,<sup>1,3</sup> Tao Sun,<sup>1,3</sup> Xin Ni<sup>6</sup>

17  
18  
19  
20 \*WL, SZ and LS contributed equally to this work.

21  
22  
23 **Correspondence to:** Lihua Fan, School of Public Health, Harbin Medical University, No.157 Baojian  
24 Road, Nangang District, Harbin 150081, China; E-mail: [lihuafan@126.com](mailto:lihuafan@126.com); Tao Sun, School of Public  
25 Health, Harbin Medical University, No.157 Baojian Road, Nangang District, Harbin 150081, China;  
26 E-mail: [hydsuntao@126.com](mailto:hydsuntao@126.com); Xin Ni, No.56 Nanlishi Road, Xicheng District, Beijing 100045, China;  
27 E-mail: [nixin@bch.com.cn](mailto:nixin@bch.com.cn)  
28  
29  
30  
31  
32  
33

34 <sup>1</sup> Department of Health Management, School of Public Health, Harbin Medical University, Harbin,  
35 Heilongjiang, China

36  
37  
38 <sup>2</sup> Department of Neurosurgery, The Second Affiliated Hospital of Harbin Medical University, Harbin,  
39 Heilongjiang, China

40  
41  
42 <sup>3</sup> Department of Medical Education, School of Public Health, Harbin Medical University, Harbin,  
43 Heilongjiang, China

44  
45  
46 <sup>4</sup> Department of Public Health Research, School of Public Health, Qiqihar Medical University, Qiqihar,  
47 Heilongjiang, China

48  
49 <sup>5</sup> Department of Autonomous Protection, Chinese Hospital Association, Beijing, China

50  
51 <sup>6</sup> Department of the Hospital Director, National Center for Children's Health, Beijing Children's Hospital  
52 affiliated to Capital Medical University, Beijing, China  
53  
54  
55  
56  
57  
58  
59  
60

## Abstract

### Objective

Our aim was to assess the relationship between workplace violence, job satisfaction, burnout, organizational support, and turnover intention, and explore factors associated with turnover intention among nurses in Chinese tertiary hospitals.

### Methods

The purposive sampling method was used to collect data from August 2016 through January 2017. A total of 1761 nurses from 9 public tertiary hospitals in 4 provinces (municipalities) located in eastern (Beijing), central (Heilongjiang, Anhui), and western (Shaanxi) of China completed the questionnaires (effective response rate = 85.20%). A cross-sectional study was conducted using the Workplace Violence Scale, Chinese Maslach Burnout Inventory General Survey, Minnesota Job Satisfaction Questionnaire Revised Short Version, Perceived Organizational Support–Simplified Version Scale, and Turnover Intention Scale.

### Results

A total of 1216 of 1706 (69.1%) participants had high turnover intention. During the previous 12 months, the prevalence of physical violence and psychological violence toward nurses was 9.60% and 59.64%, respectively. As expected, the level of turnover intention was negatively correlated with participants' scores on job satisfaction ( $r = -0.367$ ,  $P < 0.001$ ) and perceived organizational support ( $r = -0.379$ ,  $P < 0.001$ ), respectively. Burnout was positively associated with turnover intention ( $r = 0.444$ ,  $P < 0.001$ ). Workplace violence was positively associated with turnover intention ( $\beta = 0.035$ ,  $P < 0.001$ ) in linear regression analysis. The total effect ( $\beta = 0.53$ ) of workplace violence on turnover intention comprised its direct effect ( $\beta = 0.36$ ), and its indirect effect ( $\beta = 0.17$ ).

## Conclusions

Perceived organizational support served as a mediator between workplace violence, job satisfaction, burnout, and turnover intention, and it had a significant negative impact on turnover intention. Therefore, nursing managers should understand the importance of the organization's support and establish a reasonable incentive system to decrease turnover intention.

## Strengths and limitations of this study

- A variety of statistical methods (descriptive analysis, Pearson correlation analysis, linear regression analysis, and structural equation model) were employed to investigate the relationship between independent variables and turnover intention.
- The benefits of using the both linear regression and structural equation model are the ability to understand the relationship between variables more clearly and intuitively and to better master the role of organizational support in the relationship between other variables and turnover intention.
- The retrospective approach to collecting data using self-reports of workplace violence might have led to recall and report bias.
- The results of purposive sampling were greatly influenced due to the preconceptions of the researchers. Therefore, the researchers need to clearly understand the basic characteristics of the population under study.

## INTRODUCTION

A nursing shortage is occurring worldwide and is arousing great concern.<sup>1</sup> The European Commission reported that 590,000 nurses would be shortage by the end of 2020.<sup>2</sup> In the United States, by the end of 2020, the nursing shortage will reach 340,000 nurses.<sup>3</sup> In 2001–2002, the results of the Health Resources Report for the Western Pacific Region concerning the present situation, shortages, and future trends within the world of nursing showed that the ratio of physicians to nurses in Hongkong, Japan, Thailand, Germany, and the United Kingdom was more than 1:4, and that the ratio of physicians to nurses in Finland, Norway, and Canada was over 1:6.<sup>4</sup> Without a doubt, an inadequate supply of nurses has been a long-existing problem in China. The most recognized cause of nursing shortage seems to be nurses leaves the nursing profession.<sup>5-6</sup> Many nurses tend to leave the nursing profession, and this is regarded as a global political concern.<sup>7</sup>

Turnover intention is defined as the possibility that employees will leave a job within a certain period.<sup>8</sup> The first study on turnover used the participant determination model proposed by March and Simon in 1958.<sup>9</sup> Following on from that study, standardized models, for example, the decision-making process model, the employee-withdrawal behavior model, and the intermediate chain extension model, have been constructed, using the peak mutation model, the unfolding model, and the loss motivation model.<sup>10-14</sup> Among these theoretical models and studies, turnover intention has been considered to be one of the best factors to predict turnover behavior, and has shown significant explanatory power.<sup>15</sup> Therefore, turnover intention has been the focus of this study.

Workplace violence can be divided into physical violence (including hitting, shooting, kicking, slapping, pushing, biting, pinching, wounding using sharp objects, and sexual assault and rape) and psychological violence (including verbal abuse, threats and sexual harassment).<sup>16</sup> Job satisfaction

1  
2  
3 represents the extent to which personnel's demands and desires are met within the workplace.<sup>17</sup>

4  
5  
6 Burnout is a syndrome involving emotional exhaustion and depersonalization and one where personal  
7  
8 accomplishments are reduced, resulting in continuous work stress that has not been effectively  
9  
10 handled.<sup>18</sup> Perceived organizational support refers to the overall perception and beliefs of employees  
11  
12 about how organizations view their contributions and care about their interests.<sup>19</sup>

13  
14  
15  
16 In Kim's review, it was reported that the mean score for turnover intention among Korean nurses  
17  
18 was between 2.40 and 3.85.<sup>20</sup> About 40% of the registered nurses in a teaching hospital in Malaysia  
19  
20 were reported to have a turnover intention, and the results indicated that age, work experience, nursing  
21  
22 education, and overall job satisfaction significantly influence an intention to leave.<sup>21</sup> A survey was  
23  
24 conducted in 4 general hospitals in Seoul, and the findings showed that factors influencing turnover  
25  
26 intention involve the organizational system, depersonalization, the physical environment, work role,  
27  
28 and the organizational climate.<sup>22</sup> A review of the research literature revealed that factors related to the  
29  
30 work environment were the most important in respect of nurses' turnover intentions.<sup>23</sup> A study has been  
31  
32 conducted among nurses in 1,105 general acute care hospitals in Europe and the United States, and  
33  
34 showed that the rates of nurse burnout ranged from 10% to 78%, with the job dissatisfaction rate  
35  
36 ranging from 11% to 56% and the intention to leave rate ranging from 14% to 49%.<sup>24</sup>

37  
38  
39 However, turnover intention is usually affected through a variety of factors, for example, work  
40  
41 stress,<sup>8 25</sup> workplace violence,<sup>26</sup> job satisfaction,<sup>27</sup> burnout,<sup>27</sup> perceived organizational support,<sup>28</sup>  
42  
43 organizational commitment,<sup>28</sup> among others.

44  
45  
46  
47  
48  
49  
50 Workplace violence is a widely reported phenomenon among nurses in medical settings, and it  
51  
52 influences the turnover intention of nurses.<sup>29</sup> A study indicated that turnover intention was positively  
53  
54 associated with exposure types of violence.<sup>26</sup> McDowell found workplace violence to be significantly  
55  
56

1  
2  
3 related to burnout ( $r = 0.56, P < 0.01$ ) and turnover intention ( $r = 0.24, P < 0.01$ ) for all direct care  
4  
5 paraprofessionals.<sup>30</sup> The previous results determined that a statistically significant relationship existed  
6  
7 between turnover intention and workplace violence.<sup>31 32</sup> Therefore, workplace violence is one of the  
8  
9 influential factors in turnover intention.<sup>33 34</sup>  
10  
11

12  
13 Job satisfaction has been considered as a major contributory factor to intending to stay in a job,  
14  
15 in previous studies.<sup>23 25 35</sup> In contrast to this viewpoint, previous studies have also shown that job  
16  
17 satisfaction mainly affects turnover intention in respect of organizational commitment.<sup>36 37</sup> Furthermore,  
18  
19 a third view has showed that two considerations, namely having demands and desires met and  
20  
21 organizational commitment, exist simultaneously regarding job satisfaction and turnover intention.<sup>38</sup>  
22  
23

24  
25 Moreover, substantial evidence has indicated that employees with high levels of burnout are  
26  
27 more prone to turnover intention.<sup>32 39</sup> Some studies have reported that perceived organizational support  
28  
29 is a predictor of turnover intention.<sup>36 38 40 41</sup> One study has indicated that perceived organizational  
30  
31 support is negatively associated with turnover intention.<sup>42</sup>  
32  
33

34  
35 In China, a study from Shanghai indicated that 22.5% of nurses expressed their intention to leave  
36  
37 the emergency department within the following year.<sup>43</sup> The mean score for turnover intention of ICU  
38  
39 nurses was between 1.95 and 2.92 in Shandong.<sup>44</sup> A survey of turnover intention among 10 tertiary  
40  
41 hospitals' nurses in Beijing showed that 16.5% of nurses may leave the current work unit in the  
42  
43 following year.<sup>45</sup> An investigation in Tianjin showed that work support had a negative influence on  
44  
45 turnover intention.<sup>46</sup> Previous results reflected a significant correlation between psychological capital,  
46  
47 work engagement, and turnover intention among primary nurses.<sup>47</sup> Substantial studies have mainly  
48  
49 investigated the relationship among job stress, job satisfaction, job engagement, organizational support  
50  
51 and turnover intention among Chinese nurses in one province.<sup>5 44-48</sup> Therefore, the researchers selected  
52  
53  
54  
55  
56  
57  
58  
59  
60



1  
2  
3 nurses from tertiary hospitals in several provinces and further verified the relationship between  
4  
5 workplace violence frequency and turnover intention in this study. The novelty of this study was the  
6  
7 inclusion of organizational support and the use of both linear regression and the structural equation  
8  
9 model (SEM).  
10  
11

12  
13 Based on the above evidence, researchers proposed the present study with the following  
14  
15 hypotheses: (1) workplace violence, job satisfaction, burnout and organizational support had different  
16  
17 effects on turnover intention; (2) workplace violence had a significant impact on job satisfaction and  
18  
19 burnout; (3) organizational support served as a moderator between workplace violence and turnover  
20  
21 intention; and (4) organizational support served as a moderator between job satisfaction and burnout.  
22  
23

24  
25 The present study aims to examine the relationship between workplace violence, job satisfaction,  
26  
27 burnout, organizational support and turnover intention, and explore factors associated with turnover  
28  
29 intention among nurses in Chinese tertiary hospitals.  
30  
31  
32  
33  
34

## 35 **METHODS**

### 36 **Participants and sampling**

37  
38 A cross-sectional study of nurses was conducted from August 2016 through January 2017 in eastern  
39  
40 (Beijing), central (Heilongjiang, Anhui), and western (Shaanxi) of China. A total of nine public tertiary  
41  
42 hospitals in four provinces (municipalities) were selected using a purposive sampling method. The total  
43  
44 number of nurses in 9 hospitals (the hospitals were similar in size, department setting, and number of  
45  
46 nurses) is about 18,900; a total of 2,067 samples were extracted , with these nurses accounting for  
47  
48 10.9% of the total nurses. On average, 225 nurses from each hospital were extracted (in the actual  
49  
50 sampling process, the sample size of each hospital was slightly different, but it was roughly 225  
51  
52  
53  
54  
55  
56  
57  
58  
59  
60

1  
2  
3 people). All investigators were subject to unified training before starting the investigation and could act  
4  
5 as investigators when qualified. Permission to conduct the study was acquired from the managers, and  
6  
7 the medical dispute resolution and human resources departments of the hospitals concerned. An  
8  
9 anonymous, self-administered questionnaire was used to conduct face-to-face surveys.  
10  
11 Paper-and-pencil questionnaires were filled out by each participant. Investigators (who were not unit  
12  
13 supervisors) conducted the surveys, and they were responsible for explaining the purpose of the study  
14  
15 and reminding participants of the matters to pay attention to in filling out the questionnaire. The two  
16  
17 public hospitals in Harbin (the Fourth Affiliated Hospital of Harbin Medical University and the  
18  
19 principal hospital of Harbin) were selected as the locations for our pre-study before the formal  
20  
21 investigation (200 questionnaires were distributed and returned, and these data were excluded in the  
22  
23 formal survey data). The investigators and hospital coordinators distributed and took back the  
24  
25 questionnaires immediately from the participants. A total of 2,067 questionnaires were distributed to  
26  
27 nurses, all of which were returned. However, 306 questionnaires were missing data or blank, which left  
28  
29 1,761 valid questionnaires (effective response rate = 85.20%). The following conditions were selected  
30  
31 as the inclusion criteria for this study: (1) having a practicing nurse certificate; (2) having at least one  
32  
33 year of clinical nursing experience; (3) being still engaged in clinical nursing work during the  
34  
35 investigation; and (4) voluntary participation without prejudice to the participants' work. The exclusion  
36  
37 criteria for this study were rehire after retirement nurses, refresher nurses, and nurses who had not  
38  
39 passed the probation period.  
40  
41  
42  
43  
44  
45  
46  
47  
48

## 49 **Questionnaire**

### 50 *Demographic characteristics*

51  
52 Demographic information on the nurses was collected, including sex, age, marital status, educational  
53  
54  
55  
56

1  
2  
3 background, professional qualifications, employment form, department, years of experience, and daily  
4  
5 working hours. Age was categorized as  $\leq 30$ , 31–50, and  $\geq 51$  years old. Marital status was categorized  
6  
7 as married and single/divorced/widowed. Educational background was classified as junior college or  
8  
9 below, undergraduate, and master's degree or above. Professional qualifications were categorized as  
10  
11 primary title, intermediate title, and senior title. Employment form was categorized as long-term  
12  
13 employee and temporary employee. Department was classified as emergency department, internal  
14  
15 medicine, surgery, obstetrics and gynecology, pediatrics, and other. Work experience was divided into 4  
16  
17 categories:  $\leq 4$ , 5–10, 11–20, and  $\geq 21$  years. Daily working time was categorized as  $\leq 8$ , 8–10, 10–12,  
18  
19 and  $\geq 12$  hours.  
20  
21  
22  
23  
24

### 25 ***Workplace Violence Scale***

26  
27 The Workplace Violence Scale developed by the International Labour Office, the International Council  
28  
29 of Nurses, the World Health Organization, and Public Services International Joint Program on  
30  
31 Workplace Violence in the Health Sector in 2003 was used to measure workplace violence.<sup>49</sup> The scale  
32  
33 used in this study consists of 2 dimensions (physical violence and psychological violence) and has 9  
34  
35 items that were adopted from these scales. Each item is scored on a 4-point scale reflecting  
36  
37 respondents' frequency of exposure to workplace violence (0 = 0 times, 1 = 1 time, 2 = 2–3 times, and  
38  
39 3 =  $\geq 4$  times). The total possible score ranges from 0 to 27, with a higher total score indicating a  
40  
41 higher frequency of exposure to workplace violence. In the present study, Cronbach's  $\alpha$  for the  
42  
43 Workplace Violence Scale was 0.860.  
44  
45  
46  
47  
48

### 49 ***Burnout***

50  
51 Burnout was assessed using the Chinese Maslach Burnout Inventory General Survey (CMBI-GS) in  
52  
53 the present study, with a total of 15 items, developed by Li YX, and proven to be valid.<sup>50-52</sup> The  
54  
55  
56  
57

1  
2  
3 CMBI-GS is categorized into 3 subscales reflecting job burnout: emotional exhaustion,  
4  
5  
6  
7  
8  
9  
10  
11  
12  
13  
14  
15  
16  
17  
18  
19  
20  
21  
22  
23  
24  
25  
26  
27  
28  
29  
30  
31  
32  
33  
34  
35  
36  
37  
38  
39  
40  
41  
42  
43  
44  
45  
46  
47  
48  
49  
50  
51  
52  
53  
54  
55  
56  
57  
58  
59  
60

CMBI-GS is categorized into 3 subscales reflecting job burnout: emotional exhaustion, depersonalization, and reduced personal accomplishment. The response options for each item on the CMBI-GS are rated from 0 (never) to 6 (daily), based on the frequency of occurrence of the specific work feelings of the respondent. The score of the 3 subscales is equal to the average of the sum of items for each of the subscales. The total possible score is calculated through adding the scores for 3 subscales, and it ranges from 0 to 18 points, with a higher score indicating a higher level of burnout. In terms of the average score of all items, a score less than 8.5 points indicates lower job burnout, a score of 8.5–14.2 points indicates that burnout is serious, and burnout is extremely serious when the score is greater than 14.2 points. In this study, Cronbach's  $\alpha$  for the CMBI-GS was 0.873. The internal consistency coefficients were 0.834, 0.826, 0.806, and 0.812, for emotional exhaustion, depersonalization, and reduced personal accomplishment, respectively.

### ***Job satisfaction***

The Minnesota Job Satisfaction Questionnaire Revised Short Version (MJSQ-RSV) was used in this study to assess participants' satisfaction with their job.<sup>53 54</sup> The MJSQ-RSV consists of 20 items, including 12 items measuring intrinsic satisfaction and 8 items measuring extrinsic satisfaction. Each item is rated on a 5-point Likert scale (1 = strongly unsatisfied, 2 = unsatisfied, 3 = uncertain, 4 = satisfied, and 5 = strongly satisfied). Intrinsic satisfaction refers to the degree of satisfaction with the factors involved in the job content. Extrinsic satisfaction refers to the degree of satisfaction of the individual in terms of current job rewards, promotion, and leadership style. The higher the participant's self-rating, the higher their satisfaction with the job. The present study revealed that Cronbach's  $\alpha$  for the MJSQ-RSV was 0.882, and for the two subscales it was 0.872 (intrinsic satisfaction) and 0.896 (extrinsic satisfaction).

### ***Perceived organizational support scale***

Perceived organizational support was measured using the Perceived Organizational Support–Simplified Version Scale (POS–SVS). Previous studies have found the POS–SVS to have high reliability and validity as a measure of perceived organizational support.<sup>36 41 55</sup> It consists of nine self–report items, which comprise two reverse questions (even if employees try to do the best job they can, the work unit doesn't notice it; the work unit rarely cares about employees). The other 7 items mainly indicate that work unit cares about the well–being and job satisfaction of employees and pays attention to the work goals and values and employees' opinions; employees can get help when they encounter difficulties; and the unit will be proud of what employees have achieved. Each item is rated on a 5–point Likert scale, and ranged from 1 (extremely inconsistent) to 5 (extremely consistent). The total possible score is calculated through adding the scores for all items, and it ranges from 9 to 45 points, with a higher score indicating a higher organizational support. In this study, Cronbach's  $\alpha$  for the POS–SVS was 0.890.

### ***Turnover intention scale***

The Turnover Intention Scale, which has been used to measure turnover intention among nurses was used in the present study. The turnover intention scale was developed by Lee and Lee,<sup>56</sup> and has been widely used in many studies.<sup>8 45 46</sup> This 6–item scale is divided into 3 dimensions: the possibility of an employee quitting his/her present job, the motivation for employees to find other jobs, and the possibility of employees having access to external work. Each item is scored on a 4–point scale reflecting participants' intention to leave (1 = never, 2 = seldom, 3 = occasionally, and 4 = often). The total possible score is counted through adding the scores for all items, and it ranges from 6 to 24 points, with a higher score indicating a stronger intention to leave. The extent of turnover intention is divided

1  
2  
3 into 4 levels according to the different total average score of turnover intention. A total average score  $\leq$   
4  
5  
6 1 indicates that turnover intention is particularly low, less low when it is from 1 to 2, higher when it is  
7  
8 from 2 to 3, and exceptionally high when it is greater than 3. In the present study, Cronbach's  $\alpha$  for the  
9  
10 Turnover Intention Scale was 0.862.

### 13 **Data Analysis**

14  
15 EpiData version 3.1 was used to establish the study's database. Missing data or poor-quality  
16  
17 questionnaires were eliminated. To ensure accuracy, two trained personnel entered the data after all the  
18  
19 surveys were completed. IBM SPSS V.19.0 was used for the data analysis in this study. Descriptive  
20  
21 statistics, including numbers (n), percentages (%), means, and standard deviations (SD) were calculated  
22  
23 for the demographic variables. We used one-way analysis of variance (ANOVA) or independent  
24  
25 sample t-tests to compare group differences concerning the measurements of the continuous variables.  
26  
27 Pearson's correlations were used to examine correlations among the continuous variables. Linear  
28  
29 regression analysis was used to examine the associations of the demographic variables and workplace  
30  
31 violence, job satisfaction, burnout, perceived organizational support, and turnover intention variables.  
32  
33 Statistics, including F values,  $R^2$ ,  $R^2$ -changes ( $\Delta R^2$ ), standardized regression coefficients ( $\beta$ ), and  
34  
35 P-values for each step in the regression model were reported. All study variables were tested for  
36  
37 multicollinearity. A P-value  $< 0.05$  was considered statistically significant.

38  
39  
40 Path analysis was used to examine the relationship among the five variables, including workplace  
41  
42 violence, job satisfaction, burnout, perceived organizational support, and turnover intention. A SEM for  
43  
44 path analysis was constructed using the AMOS 17.0 program to analyze the effect of workplace  
45  
46 violence on job satisfaction, burnout, perceived organizational support, and turnover intention. The  
47  
48 model was considered to have a good fit when all path coefficients were significant at the level of 0.05;  
49  
50  
51  
52  
53  
54  
55  
56  
57  
58  
59  
60

$\chi^2/df$ , was below 5; the standardized root mean square residual (SRMR) was below 0.08; the root mean square error of approximation (RMSEA) was below 0.08; the root mean square residual (RMR) was below 0.10; as well as the goodness of fit index (GFI), the normed fit index (NFI), Tucker–Lewis incremental fit (TLI) and comparative fit index (CFI) being  $\geq 0.90$ .

### **STROBE Statement**

The STROBE (Strengthening the Reporting of Observational Studies in Epidemiology) guidelines are followed in this study.

### **Patient and Public Involvement Statement**

There are no patients or public participation in this study.

### **Ethical Considerations**

Ethical approval to conduct this study was granted by the Research Ethics Committee of Harbin Medical University, and informed consent was obtained from each hospital and the nurses involved in the investigation. All participants gave their informed consent before the survey; they were assured that their personal information would be kept confidential.

## **RESULTS**

### **Demographic Characteristics of the Participants**

The demographic characteristics of the respondents are shown in Table 1.

**Table 1. Demographic characteristics of participants (N=1761).**

| <b>Demographic variables</b> | <b>n</b> | <b>%</b> |
|------------------------------|----------|----------|
| <b>Gender</b>                |          |          |
| Male                         | 60       | 3.4      |
| Female                       | 1701     | 96.6     |
| <b>Age group (years)</b>     |          |          |
| $\leq 30$                    | 899      | 51.1     |
| 31-50                        | 793      | 45.0     |

|                                    |      |      |
|------------------------------------|------|------|
| ≥ 51                               | 69   | 3.9  |
| <b>Level of education</b>          |      |      |
| Below undergraduate                | 715  | 40.6 |
| Undergraduate                      | 1020 | 57.9 |
| Master's degree or above           | 26   | 1.5  |
| <b>Marital status</b>              |      |      |
| Married                            | 1128 | 64.1 |
| Single/ divorced/ widowed          | 633  | 35.9 |
| <b>Professional qualifications</b> |      |      |
| Primary title                      | 1161 | 65.9 |
| Intermediate title                 | 528  | 30.0 |
| Senior title                       | 72   | 4.1  |
| <b>Employment form</b>             |      |      |
| Long-term employee                 | 693  | 39.4 |
| Temporary employee                 | 1068 | 60.6 |
| <b>Department</b>                  |      |      |
| Emergency Department               | 299  | 17.0 |
| Internal Medicine                  | 559  | 31.7 |
| Surgery                            | 543  | 30.8 |
| Obstetrics and Gynecology          | 93   | 5.3  |
| Pediatrics                         | 101  | 5.7  |
| ENT*                               | 82   | 4.7  |
| Other                              | 84   | 4.8  |
| <b>Years of experience</b>         |      |      |
| ≤4                                 | 529  | 30.0 |
| 5-10                               | 619  | 35.2 |
| 11-20                              | 346  | 19.6 |
| ≥21                                | 267  | 15.2 |
| <b>Daily working hours</b>         |      |      |
| ≤ 8                                | 113  | 6.4  |
| 8-10                               | 1485 | 84.3 |
| 10-12                              | 126  | 7.2  |
| ≥ 12                               | 37   | 2.1  |

\* ENT stand for eyes, nose, throat.

#### Prevalence of Workplace Violence in the Preceding 12 Months

During the previous 12 months, the prevalence of physical violence and psychological violence toward nurses was 9.60% (169/1761) and 59.64% (1111/1761), respectively. In the past year, respondents reported an exposure frequency of workplace violence at less than or equal to 3, accounting for 65.9% of all incidents. The respondents reported that the patients' relatives were the main perpetrators (71.2%,



n = 797), followed by the patients (25.4%, n = 284).

### **The Difference Between Participants' Characteristics and the Multiple Variables Score**

Table 2 shows the descriptive association between respondents' characteristics and the burnout, job satisfaction, workplace violence, perceived organizational support, and turnover intention scores. There was a significant difference in the score of turnover intention among characteristics involving age group, educational level, different professional titles, employment form, department, years of experience and daily working hours for nurses in the tertiary hospitals.

### **Pearson correlations between different measurement variables**

Table 3 shows the correlations among the respondents' turnover intention and scores on workplace violence, burnout, job satisfaction, and perceived organizational support. As expected, the level of turnover intention was positively correlated with respondents' scores on workplace violence ( $r = 0.122$ ,  $P < 0.001$ ). Burnout was positively associated with turnover intention ( $r = 0.444$ ,  $P < 0.001$ ). The level of turnover intention was negatively correlated with participants' scores on job satisfaction ( $r = -0.367$ ,  $P < 0.001$ ) and perceived organizational support ( $r = -0.379$ ,  $P < 0.001$ ), respectively.

### **Linear Regression Analysis and Path Analysis of Factors Related to Turnover Intention**

The predicting factors of turnover intention are presented in Table 4. Demographic variables that were significantly related to turnover intention were used as control variables. Demographic variables alone explained less than 3% of the overall variance in turnover intention. As shown in Block 2, workplace violence was positively associated with turnover intention ( $\beta = 0.034$ ,  $P < 0.001$ ). It explained another 2% of the overall variance in turnover intention. In Block 3, with the addition of organizational support to the model, the explained variance jumped to 13%, meaning that it was this factor that explained most of the variance. Extrinsic satisfaction added another 3%, while emotional exhaustion and

**Table 2. Burnout, job satisfaction, workplace violence, perceived organizational support and turnover intention according to general characteristics.**

| Characteristics           | Burnout     | Job satisfaction | Workplace violence | Perceived organizational support | Turnover intention |
|---------------------------|-------------|------------------|--------------------|----------------------------------|--------------------|
|                           | M ± SD      | M ± SD           | M ± SD             | M ± SD                           | M ± SD             |
| <b>Gender</b>             |             |                  |                    |                                  |                    |
| Male                      | 6.23 ± 3.34 | 3.54 ± 0.55      | 3.15 ± 3.92        | 3.27 ± 0.57                      | 2.30 ± 0.71        |
| Female                    | 6.53 ± 3.08 | 3.52 ± 0.54      | 2.11 ± 2.60        | 3.10 ± 0.64                      | 2.40 ± 0.60        |
| F/t                       | -0.757      | 0.256            | 8.931**            | 1.991*                           | -1.263             |
| <b>Age group (years)</b>  |             |                  |                    |                                  |                    |
| ≤ 30                      | 6.58 ± 3.03 | 3.54 ± 0.54      | 1.81 ± 2.38        | 3.13 ± 0.64                      | 2.44 ± 0.61        |
| 31-50                     | 6.53 ± 3.16 | 3.50 ± 0.55      | 2.36 ± 2.73        | 3.07 ± 0.65                      | 2.39 ± 0.60        |
| ≥ 51                      | 5.80 ± 3.07 | 3.55 ± 0.52      | 3.97 ± 4.09        | 3.14 ± 0.57                      | 2.04 ± 0.56        |
| F/t                       | 2.040       | 1.672            | 26.537**           | 1.986                            | 14.144**           |
| <b>Level of education</b> |             |                  |                    |                                  |                    |
| Below undergraduate       | 6.62 ± 3.01 | 3.52 ± 0.54      | 1.96 ± 2.45        | 3.11 ± 0.61                      | 2.38 ± 0.63        |
| Undergraduate             | 6.48 ± 3.13 | 3.53 ± 0.55      | 2.26 ± 2.77        | 3.10 ± 0.65                      | 2.42 ± 0.58        |
| Master's degree or above  | 5.54 ± 3.40 | 3.58 ± 0.54      | 2.58 ± 3.76        | 3.27 ± 0.78                      | 2.08 ± 0.61        |
| F/t                       | 1.737       | 0.202            | 3.161*             | 0.888                            | 4.468*             |
| <b>Marital status</b>     |             |                  |                    |                                  |                    |
| Married                   | 6.45 ± 3.12 | 3.52 ± 0.54      | 2.25 ± 2.69        | 3.10 ± 0.65                      | 2.38 ± 0.60        |
| Single/ divorced/ widowed | 6.65 ± 3.03 | 3.53 ± 0.56      | 1.96 ± 2.61        | 3.12 ± 0.63                      | 2.43 ± 0.61        |
| F/t                       | -1.304      | -0.203           | 4.789*             | -0.843                           | -1.658             |
| <b>Professional title</b> |             |                  |                    |                                  |                    |
| Primary title             | 6.67 ± 3.04 | 3.53 ± 0.54      | 1.90 ± 2.38        | 3.11 ± 0.65                      | 2.45 ± 0.60        |
| Intermediate title        | 6.42 ± 3.17 | 3.49 ± 0.56      | 2.57 ± 3.05        | 3.07 ± 0.62                      | 2.31 ± 0.61        |
| Senior title              | 4.87 ± 2.77 | 3.70 ± 0.50      | 2.86 ± 3.34        | 3.25 ± 0.68                      | 2.17 ± 0.59        |
| F/t                       | 12.077**    | 4.781**          | 14.412**           | 2.735                            | 15.543**           |

|                            |             |             |             |             |             |
|----------------------------|-------------|-------------|-------------|-------------|-------------|
| <b>Employment form</b>     |             |             |             |             |             |
| Long-term employee         | 6.71 ± 3.30 | 3.48 ± 0.57 | 2.46 ± 2.80 | 3.05 ± 0.65 | 2.32 ± 0.60 |
| Temporary employee         | 6.40 ± 2.94 | 3.55 ± 0.52 | 1.93 ± 2.55 | 3.14 ± 0.63 | 2.45 ± 0.61 |
| <b>F/t</b>                 | 2.025*      | -2.460*     | 16.717**    | -2.779**    | -4.377**    |
| <b>Department</b>          |             |             |             |             |             |
| Emergency Department       | 6.51 ± 3.21 | 3.51 ± 0.60 |             | 3.12 ± 0.70 | 2.37 ± 0.63 |
| Internal Medicine          | 6.40 ± 3.06 | 3.55 ± 0.55 | 1.90 ± 2.38 | 3.15 ± 0.64 | 2.38 ± 0.60 |
| Surgery                    | 6.73 ± 3.05 | 3.50 ± 0.54 | 2.00 ± 2.47 | 3.05 ± 0.63 | 2.45 ± 0.59 |
| Obstetrics and Gynecology  | 6.19 ± 2.71 | 3.54 ± 0.50 | 2.65 ± 3.31 | 3.13 ± 0.58 | 2.44 ± 0.56 |
| Pediatrics                 | 7.09 ± 3.23 | 3.47 ± 0.51 | 2.40 ± 2.76 | 3.08 ± 0.64 | 2.35 ± 0.67 |
| ENT                        | 5.87 ± 3.20 | 3.56 ± 0.48 | 1.74 ± 2.31 | 3.12 ± 0.62 | 2.25 ± 0.54 |
| Other                      | 6.36 ± 3.13 | 3.55 ± 0.55 | 2.58 ± 3.29 | 3.11 ± 0.57 | 2.32 ± 0.66 |
| <b>F/t</b>                 | 1.938       | 0.639       | 3.905*      | 1.211       | 2.234*      |
| <b>Years of experience</b> |             |             |             |             |             |
| ≤4                         | 6.26 ± 2.78 | 3.60 ± 0.51 | 1.70 ± 2.56 | 3.21 ± 0.58 | 2.37 ± 0.57 |
| 5-10                       | 6.88 ± 3.18 | 3.49 ± 0.55 | 2.22 ± 2.65 | 3.06 ± 0.67 | 2.49 ± 0.63 |
| 11-20                      | 6.75 ± 3.10 | 3.45 ± 0.58 | 2.28 ± 2.54 | 3.04 ± 0.67 | 2.46 ± 0.59 |
| ≥21                        | 5.94 ± 3.33 | 3.53 ± 0.53 | 2.66 ± 2.92 | 3.08 ± 0.65 | 2.18 ± 0.58 |
| <b>F/t</b>                 | 7.859**     | 6.249**     | 8.745**     | 6.690**     | 18.233**    |
| <b>Daily working hours</b> |             |             |             |             |             |
| ≤ 8                        | 6.08 ± 3.01 | 3.65 ± 0.51 | 2.20 ± 2.96 | 3.25 ± 0.69 | 2.24 ± 0.59 |
| 8-10                       | 6.53 ± 3.09 | 3.52 ± 0.55 | 2.09 ± 2.55 | 3.10 ± 0.64 | 2.41 ± 0.60 |
| 10-12                      | 6.73 ± 2.95 | 3.45 ± 0.49 | 2.06 ± 2.78 | 3.05 ± 0.57 | 2.42 ± 0.64 |
| ≥ 12                       | 7.11 ± 3.71 | 3.49 ± 0.58 | 4.14 ± 4.58 | 3.10 ± 0.62 | 2.37 ± 0.68 |
| <b>F/t</b>                 | 1.415       | 3.096*      | 7.195**     | 2.229       | 2.826*      |

\* P < 0.05, \*\* P < 0.01

1  
2  
3  
4  
5  
6  
7  
8  
9  
10  
11  
12  
13  
14  
15  
16  
17  
18  
19  
20  
21  
22  
23  
24  
25  
26  
27  
28  
29  
30  
31  
32  
33  
34  
35  
36  
37  
38  
39  
40  
41  
42  
43  
44  
45  
46  
47

**Table 3. Pearson correlations among workplace violence, burnout, job satisfaction, perceived organizational support and turnover intention.**

| Variables                                  | 1        | 2        | 3        | 4        | 5        | 6        | 7       | 8       | 9       | 10 |
|--------------------------------------------|----------|----------|----------|----------|----------|----------|---------|---------|---------|----|
| <b>1. Turnover intention</b>               | 1        |          |          |          |          |          |         |         |         |    |
| <b>2. Workplace violence</b>               | 0.122**  | 1        |          |          |          |          |         |         |         |    |
| <b>3. Burnout</b>                          | 0.444**  | 0.206**  | 1        |          |          |          |         |         |         |    |
| <b>4. Emotional exhaustion</b>             | 0.418**  | 0.213**  | 0.792**  | 1        |          |          |         |         |         |    |
| <b>5. Depersonalization</b>                | 0.460**  | 0.220**  | 0.846**  | 0.754**  | 1        |          |         |         |         |    |
| <b>6. Reduced Personal Accomplishment</b>  | 0.102**  | 0.025    | 0.545**  | 0.017    | 0.116**  | 1        |         |         |         |    |
| <b>7. Perceived organizational support</b> | -0.379** | -0.172** | -0.527** | -0.445** | -0.495** | -0.216** | 1       |         |         |    |
| <b>8. Job satisfaction</b>                 | -0.367** | -0.188** | -0.562** | -0.478** | -0.524** | -0.231** | 0.675** | 1       |         |    |
| <b>9. Intrinsic satisfaction</b>           | -0.330** | -0.171** | -0.532** | -0.441** | -0.493** | -0.232*  | 0.626** | 0.946** | 1       |    |
| <b>10. Extrinsic satisfaction</b>          | -0.390** | -0.176** | -0.505** | -0.456** | -0.476** | -0.178** | 0.673** | 0.900** | 0.795** | 1  |

\* P<0.05, \*\* P<0.01

**Table 4. Predicting factors of turnover intention.**

| Variables                       | Block 1 ( $\beta$ ) | Block 2 ( $\beta$ ) | Block 3 ( $\beta$ ) | Block 4 ( $\beta$ ) | Block 5 ( $\beta$ ) |
|---------------------------------|---------------------|---------------------|---------------------|---------------------|---------------------|
| Age group                       | -0.055              | -0.076*             | -0.055              | -0.055              | -0.051              |
| Level of education              | 0.028               | 0.022               | 0.028               | 0.025               | 0.026               |
| Professional qualifications     | 0.120**             | 0.128**             | 0.098**             | 0.095**             | 0.044               |
| Employment form                 | 0.081*              | 0.087*              | 0.108**             | 0.098**             | 0.146**             |
| Department                      | 0.008               | 0.011               | 0.010               | 0.011               | 0.007               |
| Years of experience             | 0.034               | 0.038               | 0.014               | 0.006               | 0.001               |
| Daily working hours             | 0.056               | 0.046               | 0.030               | 0.012               | 0.009               |
| Workplace violence              |                     | 0.034**             | 0.019**             | 0.016**             | 0.005               |
| Organizational support          |                     |                     | -0.039**            | -0.022**            | -0.012**            |
| Intrinsic satisfaction          |                     |                     |                     | 0.001               | 0.008*              |
| Extrinsic satisfaction          |                     |                     |                     | -0.037**            | -0.030**            |
| Emotional exhaustion            |                     |                     |                     |                     | 0.051**             |
| Depersonalization               |                     |                     |                     |                     | 0.113**             |
| Reduced Personal Accomplishment |                     |                     |                     |                     | 0.004               |
| <i>F</i>                        | 6.374**             | 10.553**            | 41.686**            | 41.863**            | 51.582**            |
| <i>R</i> <sup>2</sup>           | 0.025               | 0.046               | 0.176               | 0.208               | 0.293               |
| $\Delta R^2$                    | 0.025**             | 0.021**             | 0.130**             | 0.032**             | 0.085**             |

\*  $P < 0.05$ , \*\*  $P < 0.01$

depersonalization contributed nearly 9%. Furthermore, it should be noted that professional qualifications were significant in every step except in the final step, when burnout was added to the model. It was interesting that employment form was significant throughout.

Path analysis using the SEM was performed, which is shown in Figure 1. workplace violence had a negative effect on job satisfaction, which was mediated through perceived organizational support. The total effect ( $\beta = -0.19$ ) of workplace violence on job satisfaction was comprised of not only its direct effect ( $\beta = -0.12$ ), but also its indirect effect ( $\beta = -0.07 = -0.13 \times 0.50$ ), mediated through perceived organizational support. The total effect ( $\beta = 0.53$ ) of workplace violence on turnover intention comprised its direct effect ( $\beta = 0.36$ ), and its indirect effect ( $\beta = 0.17 = (-0.12) \times 0.19 + (-0.13) \times (-1.05) + 0.25 \times (-0.17) \times (-1.05) + (-0.13) \times 0.50 \times (-0.19)$ ). Job satisfaction was negatively associated with burnout. On the other hand, job burnout was positively related to turnover intention.

1  
2  
3 The squared multiple correlations value was 0.432, which implies that the built SEM explained 43.2%  
4  
5  
6 of the total variance of turnover intention.  
7  
8  
9

## 10 **DISCUSSION**

11  
12 Although different measurement tools for turnover intention were used in different studies, the average  
13  
14 scores and percentages of perceived high turnover intention have been used as a reference for  
15  
16 measuring potential turnover behavior.<sup>57</sup> The total mean score of overall perception of turnover  
17  
18 intention is greater than 2 points, which means that the turnover intention of nurses is high. Based on  
19  
20 this standard, 545 participants had a low turnover intention, but 1216 (69.1%) participants had a high  
21  
22 turnover intention. Meanwhile, a total of 291 of the 1216 nurses (23.9%) with a higher turnover  
23  
24 intention tended to want to leave more strongly (mean score of turnover intention > 3). The Chinese  
25  
26 nurses intending to leave their current profession was higher than in Malaysia,<sup>21</sup> America,<sup>24</sup> Finland,<sup>24</sup>  
27  
28 and Greece.<sup>24</sup> The reason for this phenomenon may be attributed to two aspects. On the one hand,  
29  
30 nursing is a professional, intellectual and practical specialty. With the increase in social demand for  
31  
32 nurses, nurses have certain advantages in obtaining employment. They can more readily find jobs,  
33  
34 which increases the likelihood of nurses leaving their current jobs. On the other hand, the contradiction  
35  
36 between the low social status of nurses and patient expectations is becoming a prominent problem in  
37  
38 China's medical environment, which is leading to a crisis of confidence. It is worth noting that  
39  
40 historical reasons have led to low status and poor professional recognition of Chinese nurses. However,  
41  
42 patients place high demands on the level of health services provided by nurses. This significant contrast  
43  
44 between expectations and reality can easily lead to nurses' resignations. Based on the present study,  
45  
46 more attention need to be paid to nurses in China to reduce their turnover intention.  
47  
48  
49  
50  
51  
52  
53  
54  
55  
56

1  
2  
3  
4 According to linear regression analysis, Block 1 showed that professional qualifications and  
5  
6 employment form are two important demographic variables that affect nurses' turnover intention,  
7  
8 which is different from the findings of Almalki *et al.*'s study.<sup>58</sup> The results of single factor analysis  
9  
10 indicated that nurses with lower-level professional qualifications had a higher turnover intention, and  
11  
12 full-time employed nurses had a lower turnover intention than temporarily employed nurses. This may  
13  
14 be attributed to nurses with low professional qualifications being generally in first-line clinical work,  
15  
16 facing a heavy workload and finding it difficult to cope with the patients or their relatives. They are  
17  
18 confronted with an imbalance between pay and return, as well as social ignorance of their role, which  
19  
20 affects their work enthusiasm, and thereby increasing the possibility of leaving. In addition, the  
21  
22 temporarily employed nurses' income is unstable and these nurses do not have a strong sense of  
23  
24 belonging to the hospital, so a turnover intention possibility is stronger.  
25  
26  
27  
28  
29

30  
31 In the linear regression analysis, Block 2 showed that workplace violence is one of the significant  
32  
33 predictors of turnover intention, which was consistent with earlier findings.<sup>30-34</sup> Workplace violence is a  
34  
35 particularly shocking event within our model. Workplace violence not only causes physical and  
36  
37 psychological harm to nurses<sup>59</sup> but also aggravates nurses' stress and reluctance to work,<sup>16</sup> resulting in  
38  
39 an increase in turnover intention. Meanwhile, workplace violence can provoke in nurses a sense of  
40  
41 extreme insecurity and reduced self-value which may directly lead to turnover intention. The results of  
42  
43 linear regression analysis also demonstrated that emotional exhaustion and depersonalization had a  
44  
45 positive significant influence on turnover intention, and they explained 9% of the overall variance in  
46  
47 turnover intention. In short, our findings showed that job burnout is positively related to turnover  
48  
49 intention, which is similar to previous results.<sup>21 27 29 38</sup> Clinical nurses often undertake overloaded work,  
50  
51 and especially young nurses who have just started work, have relatively insufficient clinical technical  
52  
53  
54  
55  
56  
57  
58  
59  
60

1  
2  
3 ability and effective communication skills. When their behavior is different from the expectations of  
4  
5 doctors/administrators/patients, the doctor/ manager's criticism and patient's dissatisfaction will reduce  
6  
7 their work enthusiasm and easily lead to emotional exhaustion, and causing turnover intention. Another  
8  
9 noteworthy result of our study was that job satisfaction was found to be negatively related to turnover  
10  
11 intention in the SEM and Pearson correlation analysis, similar to previous results.<sup>8 10 23 25</sup> Therefore,  
12  
13 hospitals should pay greater attention to the working conditions and health status of nurses and increase  
14  
15 their job satisfaction and sense of organizational belonging to reduce their turnover intention.  
16  
17  
18  
19

20  
21 Organizational support explained 13% of the overall variance in turnover intention regarding the  
22  
23 results of the linear regression, and it was the most significant predictor of turnover intention. The  
24  
25 results of the SEM also showed that organizational support has a direct or indirect effect on turnover  
26  
27 intention. These results suggested that organizational support makes the greatest contribution to the  
28  
29 model of turnover intention, which were similar to previous findings.<sup>36 37</sup> The psychological mechanism  
30  
31 embodied in the perceived organizational support is the social exchange between employees and  
32  
33 organizations.<sup>60</sup> From the view of social exchange, the exchange consciousness of employees  
34  
35 concerning perceived organizational support depends entirely on the level of that organizational  
36  
37 support. The fundamental reason employees are willing to stay in an organization is that they feel the  
38  
39 contributions of employees to the organization are equal or fair in respect of what they receive in return  
40  
41 from the relevant organization. As knowledge workers, nurses generally have higher achievement  
42  
43 motivation, because they hope to achieve and get social recognition value. When a nurse thinks that  
44  
45 hospitals and departments must pay attention to his or her contributions and are concerned about their  
46  
47 personal interests and occupation development, this will reduce turnover intention and will lead to a  
48  
49 higher organizational commitment and work ability.  
50  
51  
52  
53  
54  
55  
56  
57  
58  
59  
60



1  
2  
3  
4           Synthesizing the results of the linear regression analysis and SEM showed that perceived  
5  
6 organizational support played a mediating role in the relationships between workplace violence,  
7  
8 burnout, and job satisfaction on turnover intention. This result is a flash point in our study. After  
9  
10 workplace violence has occurred, hospitals need to provide care and support to nurses as far as possible  
11  
12 to reduce the harm of violence inflicted on them, which, in turn, is likely to increase their emotional  
13  
14 commitment to the hospital, and reduce the possibility of leaving. The hospital can set up a  
15  
16 psychological decompression room, regularly conduct psychological counseling for nurses through a  
17  
18 psychologist, and conduct emotional management well.<sup>16</sup> Hospitals can also provide a series of  
19  
20 organizational support to reduce effect of low job satisfaction and high burnout of nurses on the  
21  
22 turnover intention. First, strengthen communication, understand the needs of nurses, and take targeted  
23  
24 organizational support measures so that nurses can really appreciate the hospitals' support; second, pay  
25  
26 attention to the work of nurses, provide necessary work resources and condition support for them, pay  
27  
28 attention to the problems faced by nurses and try their best to provide help to alleviate nurses'  
29  
30 emotional exhaustion and reduce the degree of depersonalization; and finally, pay attention to the  
31  
32 welfare of nurses, implement reasonable salaries and performance incentive system, pay attention to  
33  
34 the interests of nurses in decision-making, and at the same time, pay attention to the professional  
35  
36 development of nurses, and provide more development platforms for nurses so that they can find their  
37  
38 own value and personal accomplishment in the process of career development. In brief, the more  
39  
40 comprehensive the support provided by the organization, the less likely the nurses are to have bad  
41  
42 emotions.  
43  
44  
45  
46  
47  
48  
49  
50

51  
52           In conclusion, the hospital should provide active support measures, including: giving respect,  
53  
54 welfare support, and practical support; effectively conveying the support of upper management;  
55  
56

1  
2  
3 ensuring a relationship of trust and support between employees and their immediate supervisors;  
4  
5 emphasizing procedural justice in the organization; and creating a supportive organizational climate.<sup>19</sup>  
6  
7  
8 These measures are likely to encourage nurses to stay in their present position, and improve their job  
9  
10 satisfaction and reduce their job burnout, thus reducing their turnover rate.<sup>36 42</sup>  
11  
12

13 The SEM results also clearly stated that organizational support serves as a mediator between job  
14  
15 satisfaction and burnout. This means that organizational support (paying attention to nurses' feelings  
16  
17 and salary benefits) can relieve nurses' job burnout to some extent and then improve their satisfaction  
18  
19 with various systems and policies of the organization. As a reward for the organization, nurses will also  
20  
21 enhance their commitment and loyalty to the organization and will improve their efforts to work.  
22  
23  
24

25 The present study has several limitations. First, researchers collected data concerning whether  
26  
27 nurses had experienced workplace violence in the last 12 months, so there may be recall bias in the  
28  
29 results. Second, it was not known whether those returning incomplete questionnaires differed in any  
30  
31 significant way from those who completed them. Third, purposive sampling results are greatly  
32  
33 influenced due to the preconceptions of researchers. To the extent that subjective judgment may be  
34  
35 biased, this can readily lead to sampling bias and cannot provide complete confidence in the results of  
36  
37 the overall investigation. Thus, the researchers involved clearly understand the basic characteristics of  
38  
39 the population under investigation, so that the selected samples can be representative and typical.  
40  
41  
42  
43  
44  
45  
46

## 47 **CONCLUSIONS**

48  
49 Perceived organizational support served as a mediator between workplace violence, job satisfaction,  
50  
51 burnout and turnover intention, and it has a significant negative impact on turnover intention. Therefore,  
52  
53 nursing managers should understand the organization's support and establish a reasonable incentive  
54  
55  
56

1  
2  
3  
4 system to decrease turnover intention.

## 5 6 **Acknowledgments**

7  
8 The authors thank all the nurses, managers and Chinese Hospital Association for their assistance and  
9  
10 support for this project.  
11

## 12 13 **Author Contributions**

14  
15 LF, TS and XN designed the study. WL, LS, ZZ, XL, XJ, and LL collected data. WL, SZ, LS, XD, GL,  
16  
17 LL and FL analysed the data. WL, SZ and LS drafted the manuscript. WL, LF, TS and XN revised the  
18  
19 manuscript.  
20  
21

## 22 23 **Funding**

24  
25 This study was funded by the National Natural Science Foundation of China (NSFC), grant number  
26  
27 71473063.  
28  
29

30  
31 **Competing interests** None declared.  
32

33  
34  
35 **Data sharing statement** No additional data are available.  
36  
37

## 38 39 **REFERENCES**

- 40  
41  
42 1. Nardi DA, Gyrko CC. The Global Nursing Faculty Shortage: Status and Solutions for Change. *J*  
43  
44 *Nurs Scholarship* 2013;45(3):317-26.  
45  
46  
47 2. Sermeus W, Bruyneel L. Investing in Europe's health workforce of tomorrow: Scope for  
48  
49 innovation and collaboration. Summary report of the three Policy Dialogues. European  
50  
51 Observatory on Health Systems and Policies. *Effect of Growth Rate of Load on Strain Aging of*  
52  
53 *Soft Soil in Marsh* 2010;1995-2001.  
54  
55  
56  
57

- 1  
2  
3  
4 3. Auerbach D, Buerhaus P D. Better late than never: workforce supply implications of later entry  
5  
6 into nursing. *Health Affairs* 2007;26(1):178-185.
- 7  
8 4. Xiaoyan W. Analysis of the situation of nursing human resources in public hospitals. *The World*  
9  
10 *Clinical Medicine* 2016;10(4):247-248.
- 11  
12 5. You LM, Ke YY, Zheng J, *et al*. The development and issues of nursing education in China: a national  
13  
14 data analysis. *Nurse Educ Today* 2015;35(2):310-314.
- 15  
16 6. Janiszewski GH. The nursing shortage in the United States of America: an integrative review of the  
17  
18 literature. *J Adv Nurs* 2003;43(4):335-350.
- 19  
20 7. Anderson DJ, Chan E, Dresner P, *et al*. Nursing and Midwifery Services Strategic Directions, 2011-2015.  
21  
22 *World Health Organization* 2010.
- 23  
24 8. Chao MC, Jou RC, Liao CC, *et al*. Workplace stress, job satisfaction, job performance, and  
25  
26 turnover intention of health care workers in rural Taiwan. *Asia Pac J Public Health* 2015;  
27  
28 27:NP1827-NP1836.
- 29  
30 9. March JG, Simon HA. *Organizations*. New York: Wiley, 1958.
- 31  
32 10. Mobley WH, Griffeth RW, Hand HH, *et al*. Review and conceptual analysis of the employee  
33  
34 turnover process. *Psychol Bull* 1979;86:493-522.
- 35  
36 11. Bluedorn AC. A unified model of turnover from organizations. *Human Relations* 1982;35:135-  
37  
38 53.
- 39  
40 12. Sheridan JE, Abelson MA. Cusp catastrophe model of employee turnover. *Academy of*  
41  
42 *Management Journal* 1983;26:418-36.
- 43  
44 13. Lee TW, Mitchell TR. An alternative approach: the unfolding model of voluntary employee  
45  
46 turnover. *Academy of Management Review* 1994;1:51-89.
- 47  
48  
49  
50  
51  
52  
53  
54  
55  
56  
57  
58  
59  
60

- 1  
2  
3 14. Price JL. The development of a causal model of voluntary turnover. *Iowa State University Press:*  
4  
5  
6 *Ames* 2000.  
7
- 8 15. Griffeth RW, Hom PW, Gaertner S. A meta-analysis of antecedents and correlates of employee  
9  
10 turnover: update, moderator tests, and research implications for the next millennium. *Journal of*  
11  
12 *Management* 2000;26(3):463-488.  
13
- 14 16. Shi L, Zhang D, Zhou C, *et al.* A cross-sectional study on the prevalence and associated risk  
15  
16 factors for workplace violence against Chinese nurses. *BMJ open* 2017;7(6):e013105.  
17
- 18 17. Utriainen K, Kyngäs H. Hospital nurses' job satisfaction: a literature review. *J Nurs Manag*  
19  
20 2009;17:1002-1010.  
21
- 22 18. Maslach C, Jackson SE. The measurement of experienced burnout. *Journal of Organizational*  
23  
24 *Behavior* 1981;2(2):99-113.  
25
- 26 19. Rhoades L, Eisenberger R. Perceived organizational support: A review of the literature. *Journal*  
27  
28 *of Applied Psychology* 2002;87(4):698-714.  
29
- 30 20. Kim JK, Kim MJ. A Review of Research on Hospital Nurses' Turnover Intention. *Journal of*  
31  
32 *Korean Academy of Nursing Administration* 2011;17(4):538.  
33
- 34 21. Ramoo V, Abdullah KL, Piaw CY. The relationship between job satisfaction and intention to  
35  
36 leave current employment among registered nurses in a teaching hospital. *J Clin Nurs* 2013;  
37  
38 22(21-22):3141-3152.  
39
- 40 22. Yoon GS, Kim SY. Influences of Job Stress and Burnout on Turnover Intention of Nurses. *J*  
41  
42 *Korean Acad Nurs Admin* 2010;16(4):507-516.  
43
- 44 23. Coomber B, Barriball KL. Impact of job satisfaction components on intent to leave and turnover  
45  
46 for hospital-based nurses:A review of the research literature. *Int J Nurs Stud* 2007;44(2):297-314.  
47  
48  
49  
50  
51  
52  
53  
54  
55  
56

- 1  
2  
3  
4 24. Aiken LH, Sermeus W, Van den Heede K, *et al.* Patient safety, satisfaction, and quality of  
5  
6 hospital care: cross sectional surveys of nurses and patients in 12 countries in Europe and the  
7  
8 United States. *BMJ* 2012;344:e1717.  
9
- 10  
11 25. Li L, Hu H, Zhou H, *et al.* Work stress, work motivation and their effects on job satisfaction in  
12  
13 community health workers: a cross-sectional survey in China. *BMJ Open* 2014;4(6):e004897.  
14
- 15  
16 26. Choi SH, Lee H. Workplace violence against nurses in Korea and its impact on professional  
17  
18 quality of life and turnover intention. *J Nurs Manage* 2017;1-11.  
19
- 20  
21 27. Labrague LJ, Mcentro cc Etitte DM, Gloe D, *et al.* Organizational politics, nurses' stress, burnout  
22  
23 levels, turnover intention and job satisfaction. *Int Nurs Rev* 2017;64(1):109.  
24
- 25  
26 28. Oyeleye O, Hanson P, O'Connor N, *et al.* Relationship of workplace incivility, stress, and  
27  
28 burnout on nurses' turnover intentions and psychological empowerment. *J Nurs Admin* 2013;  
29  
30 43(10):536-542.  
31
- 32  
33 29. Seo, Min S, Kim, *et al.* Effect of Workplace Bullying, Job Satisfaction and Self-Esteem on  
34  
35 Turnover Intention in Clinical Nurses. *Journal of the Korean Society for Wellness*  
36  
37 2017;12(2):105-115.  
38
- 39  
40 30. Mcdowell SS. Client-Inflicted Workplace Violence, Burnout, Job Satisfaction, and Turnover  
41  
42 Intention: A Comparative Analysis Between Institution-Based and Home-Based Direct Care  
43  
44 Paraprofessionals. *Dissertations & Theses - Gradworks* 2015;208.  
45
- 46  
47 31. Olsen E, Bjaalid G, Mikkelsen A. Work climate and the mediating role of workplace bullying  
48  
49 related to job performance, job satisfaction, and work ability: A study among hospital nurses. *J*  
50  
51 *Adv Nurs* 2017.  
52
- 53  
54  
55 32. Tarja H, Anne K, Marianna V, *et al.* The prospective effects of workplace violence on physicians'  
56  
57

- 1  
2  
3  
4  
5  
6  
7  
8  
9  
10  
11  
12  
13  
14  
15  
16  
17  
18  
19  
20  
21  
22  
23  
24  
25  
26  
27  
28  
29  
30  
31  
32  
33  
34  
35  
36  
37  
38  
39  
40  
41  
42  
43  
44  
45  
46  
47  
48  
49  
50  
51  
52  
53  
54  
55  
56  
57  
58  
59  
60
- job satisfaction and turnover intentions: the buffering effect of job control. *BMC Health Serv Res* 2014;14(1):1-8.
33. Christensen MP. Relationships between workplace violence, burnout, and intent to leave in emergency department nurses. *Dissertations & Theses-Gradworks* 2014;21(21):984-90.
34. Kim JI, Kim TS. Violence episodes and turnover among clinical nurses. *Journal of Korean Academy of Nursing Administration* 2004;10(4):427-436.
35. Tnay E, Othman AEA, Siong HC, *et al*. The Influences of Job Satisfaction and Organizational Commitment on Turnover Intention. *Procedia Social and Behavioral Sciences* 2013;97(2):201-208.
36. Islam T, Latif I, Ali G. The relationship between perceived organizational support and turnover intention: mediating role of affective commitment and job satisfaction. *Research Journal of Applied Sciences Engineering & Technology* 2014;8(24):2422-2425.
37. Samad S, Yasmin S, Yusuf M. The Role of Organizational Commitment in Mediating the Relationship between Job Satisfaction and Turnover Intention. *European Journal of Social Sciences* 2012;30(2):135-137.
38. Yücel I. Examining the Relationships among Job Satisfaction, Organizational Commitment, and Turnover Intention: An Empirical Study. *International Journal of Business & Management* 2012;7(20):1-15.
39. Shimizu T, Feng Q, Nagata S. Relationship between turnover and burnout among Japanese hospital nurses. *J Occup Health* 2005;47(4):334.
40. Abou Hashish E A. Relationship between ethical work climate and nurses' perception of

- 1  
2  
3 organizational support, commitment, job satisfaction and turnover intent. *Nurs Ethics*  
4  
5  
6 2015;1-16.  
7
- 8 41. Dawley D, Houghton JD, Bucklew NS. Perceived organizational support and turnover intention:  
9  
10 the mediating effects of personal sacrifice and job fit. *Journal of Social Psychology* 2010;150(3):  
11  
12 238-257.  
13  
14
- 15 42. Tumwesigye G. The relationship between perceived organizational support and turnover  
16  
17 intentions in a developing country: The mediating role of organizational commitment. *African*  
18  
19 *Journal of Business Management* 2010;4(6):942-952.  
20  
21  
22
- 23 43. Zhang Y, Wu J, Fang Z, *et al.* Newly graduated nurses' intention to leave in their first year of  
24  
25 practice in Shanghai: A longitudinal study. *Nurs Outlook* 2017;65(2):202-209.  
26  
27
- 28 44. Sun FF, Xu CP. Job stress and its relationship with quality of life and turnover intention of ICU  
29  
30 nurses in general hospital. *Shandong University* 2016.  
31  
32
- 33 45. Lei W, Hong S, Xin G, *et al.* Correlation research between nurses' status of career planning and  
34  
35 job satisfaction, turnover intention. *Chin J Mod Nurs* 2015;21(31):3721-3723.  
36  
37
- 38 46. Zhang HF, Liu YH, Yang Y, *et al.* The influencing factors of nurses' turnover tendency. *Chinese*  
39  
40 *Journal of Nursing* 2015;50(2):155-160.  
41  
42
- 43 47. Hongmei YI, Lanxian YU, Tang J, *et al.* Relationship between psychological capital, work  
44  
45 engagement and turnover intention among primary nurses in Traditional Chinese Medicine  
46  
47 hospitals. *Chinese Nursing Management* 2015.  
48  
49
- 50 48. Li L, Ai H, Gao L, *et al.* Moderating effects of coping on work stress and job performance for  
51  
52 nurses in tertiary hospitals: a cross-sectional survey in China. *BMC Health Serv Res* 2017;  
53  
54 17(1):401.  
55  
56  
57  
58  
59  
60



- 1  
2  
3  
4 49. ILO/ICN/WHO/PSI. Framework Guidelines for Addressing Workplace Violence in the Health  
5  
6 Sector. Geneva: ILO/ICN/WHO/PSI Joint Programme on Workplace Violence in the Health  
7  
8 Sector; 2002.  
9
- 10  
11 50. Richardsen AM, Martinussen M. Factorial validity and consistency of the MBI-GS across  
12  
13 occupational groups in Norway. *International Journal of Stress Management* 2005;  
14  
15 12(3):289-297.  
16
- 17  
18 51. Li YX, Zhang K, Zhao GX. Confirmatory factor analysis of job burnout. *Psychological*  
19  
20 *Exploration (in China)* 2005;4:70-74.  
21
- 22  
23 52. Li CP, Shi K. The influence of distributive justice and procedural justice on Job Burnout. *Acta*  
24  
25 *Psychologica Sinica* 2003;35(5):677-684.  
26
- 27  
28 53. Lin Y, Jing-Xiang MA, Chen WQ, *et al.* Relationship between Perception of Job Characteristics  
29  
30 and Job Satisfaction of Pediatric Nurses. *Journal of Nursing* 2013.  
31
- 32  
33 54. Hirschfeld RR. Does Revising the Intrinsic and Extrinsic Subscales of the Minnesota Satisfaction  
34  
35 Questionnaire Short Form Make a Difference? *Educational & Psychological Measurement*  
36  
37 2000;60(60):255-270.  
38
- 39  
40 55. Chen ZX, Aryee S, Lee C. Test of a mediation model of perceived organizational support.  
41  
42 *Journal of Vocational Behavior* 2005;66(3):457-470.  
43
- 44  
45 56. Lee G, Lee D. A study on the relationships among role conflict, organizational commitment and  
46  
47 intent to quit matrix organizational structure: using employees from industrial technology  
48  
49 research institute as example. *Graduate School of management, National Chiao Tung*  
50  
51 *University* 2000.  
52
- 53  
54  
55 57. Gu St, Huang QM, Chen ZHQ, *et al.* Relationship between job satisfaction and turnover  
56  
57

- 1  
2  
3  
4  
5  
6  
7  
8  
9  
10  
11  
12  
13  
14  
15  
16  
17  
18  
19  
20  
21  
22  
23  
24  
25  
26  
27  
28  
29
- intention among physicians from three grade hospitals. *Chinese Journal of Hospital Administration* 2006;9:586-589.
58. Almalki MJ, Gerry FG, Michele C. The relationship between quality of work life and turnover intention of primary health care nurses in Saudi Arabia. *BMC Health Serv Res* 2012;12(1):314.
59. Shi L, Wang L, Jia X, *et al.* Prevalence and correlates of symptoms of post-traumatic stress disorder among Chinese healthcare workers exposed to physical violence: a cross-sectional study. *BMJ Open* 2017; 7(7):e016810.
60. Settoon RP, Bennett N, Liden RC. Social exchange in organizations: Perceived organizational support, leader-member exchange, and employee reciprocity. *Social Science Electronic Publishing* 2014;81(3):219-227.

30  
31  
32  
33

**FIGURE LEGEND: Figure 1. The final model in this study. (CFI = 0.956, GFI = 0.924, IFI = 0.942, NFI=0.931, RMR = 0.050, RMSEA = 0.053, TLI = 0.926)**

34  
35  
36  
37  
38  
39  
40  
41  
42  
43  
44  
45  
46  
47  
48  
49  
50  
51  
52  
53  
54  
55  
56  
57  
58  
59  
60

Note: CFI, comparative fit index; GFI, goodness of fit index; IFI, incremental fit index; NFI, normed fit index; RMR, root mean square residual; RMSEA, root mean square error of approximation; TLI, Tucker–Lewis incremental fit.

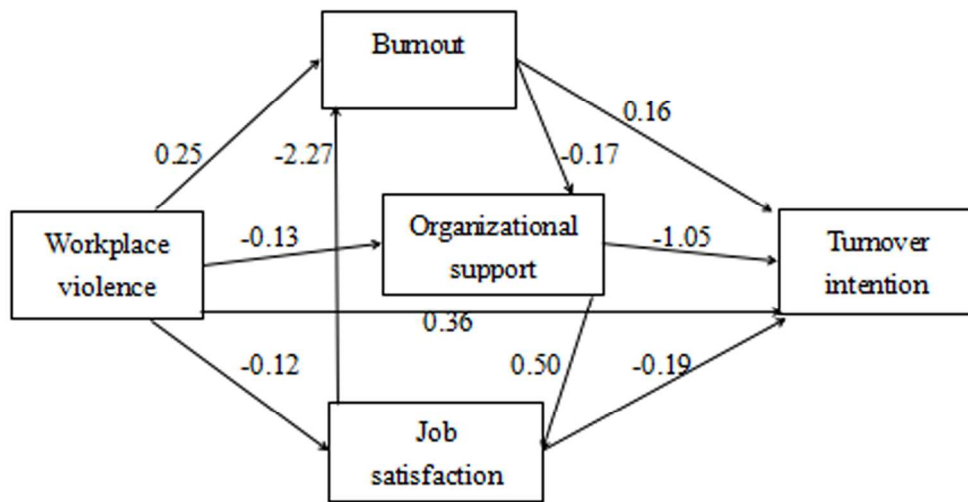

Figure 1. The final model in this study. (CFI = 0.956, GFI = 0.924, IFI = 0.942, NFI=0.931, RMR = 0,050, RMSEA = 0.053, TLI = 0.926)

Note: CFI, comparative fit index; GFI, goodness of fit index; IFI, incremental fit index; NFI, normed fit index; RMR, root mean square residual; RMSEA, root mean square error of approximation; TLI, Tucker-Lewis incremental fit.

117x61mm (300 x 300 DPI)

STROBE 2007 (v4) Statement—Checklist of items that should be included in reports of *cross-sectional studies*

| Section/Topic             | Item # | Recommendation                                                                                                                                                                       | Reported on page #          |
|---------------------------|--------|--------------------------------------------------------------------------------------------------------------------------------------------------------------------------------------|-----------------------------|
| Title and abstract        | 1      | (a) Indicate the study’s design with a commonly used term in the title or the abstract                                                                                               | Page 3, line 4-9            |
|                           |        | (b) Provide in the abstract an informative and balanced summary of what was done and what was found                                                                                  | p.4, line 4-18              |
| <b>Introduction</b>       |        |                                                                                                                                                                                      |                             |
| Background/rationale      | 2      | Explain the scientific background and rationale for the investigation being reported                                                                                                 | P. 5; p. 6; p. 7, line 4-49 |
| Objectives                | 3      | State specific objectives, including any prespecified hypotheses                                                                                                                     | P. 8, line15-33             |
| <b>Methods</b>            |        |                                                                                                                                                                                      |                             |
| Study design              | 4      | Present key elements of study design early in the paper                                                                                                                              | P. 8, line38-55;            |
| Setting                   | 5      | Describe the setting, locations, and relevant dates, including periods of recruitment, exposure, follow-up, and data collection                                                      | P. 9, line 21-48            |
| Participants              | 6      | (a) Give the eligibility criteria, and the sources and methods of selection of participants                                                                                          | p.8, 40-56                  |
| Variables                 | 7      | Clearly define all outcomes, exposures, predictors, potential confounders, and effect modifiers. Give diagnostic criteria, if applicable                                             | P. 10, line 4-21            |
| Data sources/ measurement | 8*     | For each variable of interest, give sources of data and details of methods of assessment (measurement). Describe comparability of assessment methods if there is more than one group | P. 10; p.11; p.12           |

|                        |     |                                                                                                                                                                                                   |                                      |
|------------------------|-----|---------------------------------------------------------------------------------------------------------------------------------------------------------------------------------------------------|--------------------------------------|
| Bias                   | 9   | Describe any efforts to address potential sources of bias                                                                                                                                         | P.13, line13-18                      |
| Study size             | 10  | Explain how the study size was arrived at                                                                                                                                                         | P. 9, line 48-56                     |
| Quantitative variables | 11  | Explain how quantitative variables were handled in the analyses. If applicable, describe which groupings were chosen and why                                                                      | p. 13, line24-26                     |
| Statistical methods    | 12  | (a) Describe all statistical methods, including those used to control for confounding                                                                                                             | P. 13, line13-55                     |
|                        |     | (b) Describe any methods used to examine subgroups and interactions                                                                                                                               | P. 13, line 16-19                    |
|                        |     | (c) Explain how missing data were addressed                                                                                                                                                       | P. 13, line 19-35                    |
|                        |     | (d) If applicable, describe analytical methods taking account of sampling strategy                                                                                                                | P. 13, line 4-16                     |
|                        |     | (e) Describe any sensitivity analyses                                                                                                                                                             | P. 13, line 36-40                    |
| <b>Results</b>         |     |                                                                                                                                                                                                   |                                      |
| Participants           | 13* | (a) Report numbers of individuals at each stage of study—eg numbers potentially eligible, examined for eligibility, confirmed eligible, included in the study, completing follow-up, and analysed | P. 9,line 22-48;                     |
|                        |     | (b) Give reasons for non-participation at each stage                                                                                                                                              | P. 9, line 39-48                     |
|                        |     | (c) Consider use of a flow diagram                                                                                                                                                                | No                                   |
| Descriptive data       | 14* | (a) Give characteristics of study participants (eg demographic, clinical, social) and information on exposures and potential confounders                                                          | P. 14,line 37-57;<br>P. 15,line 2-36 |
|                        |     | (b) Indicate number of participants with missing data for each variable of interest                                                                                                               | P.9, line 36                         |
| Outcome data           | 15* | Report numbers of outcome events or summary measures                                                                                                                                              | P. 15; P. 16; P. 17;<br>P. 18;P. 19  |

|    |                          |    |                                                                                                                                                                                                              |
|----|--------------------------|----|--------------------------------------------------------------------------------------------------------------------------------------------------------------------------------------------------------------|
| 1  |                          |    |                                                                                                                                                                                                              |
| 2  |                          |    |                                                                                                                                                                                                              |
| 3  |                          |    |                                                                                                                                                                                                              |
| 4  | Main results             | 16 | (a) Give unadjusted estimates and, if applicable, confounder-adjusted estimates and their precision (eg, 95% confidence interval). Make clear which confounders were adjusted for and why they were included |
| 5  |                          |    |                                                                                                                                                                                                              |
| 6  |                          |    |                                                                                                                                                                                                              |
| 7  |                          |    |                                                                                                                                                                                                              |
| 8  |                          |    | (b) Report category boundaries when continuous variables were categorized                                                                                                                                    |
| 9  |                          |    |                                                                                                                                                                                                              |
| 10 |                          |    | (c) If relevant, consider translating estimates of relative risk into absolute risk for a meaningful time period                                                                                             |
| 11 |                          |    |                                                                                                                                                                                                              |
| 12 | Other analyses           | 17 | Report other analyses done—eg analyses of subgroups and interactions, and sensitivity analyses                                                                                                               |
| 13 |                          |    |                                                                                                                                                                                                              |
| 14 |                          |    |                                                                                                                                                                                                              |
| 15 |                          |    |                                                                                                                                                                                                              |
| 16 | <b>Discussion</b>        |    |                                                                                                                                                                                                              |
| 17 |                          |    |                                                                                                                                                                                                              |
| 18 | Key results              | 18 | Summarise key results with reference to study objectives                                                                                                                                                     |
| 19 |                          |    |                                                                                                                                                                                                              |
| 20 |                          |    |                                                                                                                                                                                                              |
| 21 |                          |    |                                                                                                                                                                                                              |
| 22 | Limitations              | 19 | Discuss limitations of the study, taking into account sources of potential bias or imprecision. Discuss both direction and magnitude of any potential bias                                                   |
| 23 |                          |    |                                                                                                                                                                                                              |
| 24 |                          |    |                                                                                                                                                                                                              |
| 25 | Interpretation           | 20 | Give a cautious overall interpretation of results considering objectives, limitations, multiplicity of analyses, results from similar studies, and other relevant evidence                                   |
| 26 |                          |    |                                                                                                                                                                                                              |
| 27 |                          |    |                                                                                                                                                                                                              |
| 28 |                          |    |                                                                                                                                                                                                              |
| 29 | Generalisability         | 21 | Discuss the generalisability (external validity) of the study results                                                                                                                                        |
| 30 |                          |    |                                                                                                                                                                                                              |
| 31 |                          |    |                                                                                                                                                                                                              |
| 32 |                          |    |                                                                                                                                                                                                              |
| 33 | <b>Other information</b> |    |                                                                                                                                                                                                              |
| 34 |                          |    |                                                                                                                                                                                                              |
| 35 | Funding                  | 22 | Give the source of funding and the role of the funders for the present study and, if applicable, for the original study on which the present article is based                                                |
| 36 |                          |    |                                                                                                                                                                                                              |
| 37 |                          |    |                                                                                                                                                                                                              |
| 38 |                          |    |                                                                                                                                                                                                              |
| 39 |                          |    |                                                                                                                                                                                                              |
| 40 |                          |    |                                                                                                                                                                                                              |
| 41 |                          |    |                                                                                                                                                                                                              |
| 42 |                          |    |                                                                                                                                                                                                              |
| 43 |                          |    |                                                                                                                                                                                                              |
| 44 |                          |    |                                                                                                                                                                                                              |
| 45 |                          |    |                                                                                                                                                                                                              |
| 46 |                          |    |                                                                                                                                                                                                              |
| 47 |                          |    |                                                                                                                                                                                                              |

1  
2  
3  
4 \*Give information separately for cases and controls in case-control studies and, if applicable, for exposed and unexposed groups in cohort and cross-sectional studies.  
5  
6  
7

8 **Note:** An Explanation and Elaboration article discusses each checklist item and gives methodological background and published examples of transparent reporting. The STROBE  
9 checklist is best used in conjunction with this article (freely available on the Web sites of PLoS Medicine at <http://www.plosmedicine.org/>, Annals of Internal Medicine at  
10 <http://www.annals.org/>, and Epidemiology at <http://www.epidem.com/>). Information on the STROBE Initiative is available at [www.strobe-statement.org](http://www.strobe-statement.org).  
11  
12  
13  
14  
15  
16  
17  
18  
19  
20  
21  
22  
23  
24  
25  
26  
27  
28  
29  
30  
31  
32  
33  
34  
35  
36  
37  
38  
39  
40  
41  
42  
43  
44  
45  
46  
47

For peer review only
